# Supplementary material for: Meta-analysis of 208370 East Asians identifies 113 susceptibility loci for systemic lupus erythematosus
Source: HighWire-hosted journal article supplement (doi:10.1136/annrheumdis-2020-219209), 2020-12-03
Supplement: annrheumdis-2020-219209supp001_data_supplement.pdf [file annrheumdis-2020-219209supp001_data_supplement.pdf]

**SUPPLEMENTARY MATERIAL****SUPPLEMENTARY NOTE:**

- a. Members of the Japanese Research Committee on Idiopathic Osteonecrosis of the Femoral Head -----P2
- b. Acknowledgement -----P3
- c. Web resources -----P5

**SUPPLEMENTARY FIGURES:**

**Supplementary Figure 1:** Quantile-quantile (QQ) plot of the meta-analysis association *P* values for all variants (left) and the variants outside of known SLE loci (right). -----P6

**Supplementary Figure 2:** Regional association plots for the 113 SLE genomic loci. -----P7

**SUPPLEMENTARY TABLES:**

**Supplementary Table 1:** Characteristics of the eight studies used in this meta-analysis-----P28

**Supplementary Table 2:** Association results for the lead variants within the 113 genomic loci-----P29

**Supplementary Table 3:** Comparison of minor allele frequencies between East Asians and Europeans for the lead variants and their strong LD proxies within the 46 novel loci-----P33

**Supplementary Table 4:** LD between newly-identified and known missense variants at the same genes-----P35

**Supplementary Table 5:** Association results for the index variants of the 233 distinct signals within the 113 genomic loci-----P36

**Supplementary Table 6:** Putative causal variants with high posterior probability (PiP  $\geq 0.1$ ) or with highest PiP within 95% credible sets for 57 genomic loci-----P42

**Supplementary Table 7:** Genetic correlation between SLE and 98 complex diseases/traits in Biobank Japan-----P46

**a. Member of the Japanese Research Committee on Idiopathic Osteonecrosis of the Femoral Head**

Kohei Tomizuka<sup>1</sup>, Taisuke Seki<sup>2</sup>, Yoshiya Tanaka<sup>3</sup>, Toshikazu Kubo<sup>4</sup>, Ryo Hisada<sup>5</sup>, Tomokazu Yoshioka<sup>6</sup>, Mihoko Yamazaki<sup>7</sup>, Tamon Kabata<sup>8</sup>, Yoshiharu Amasaki<sup>9</sup>, Yoichi Ohta<sup>10</sup>, Takahiro Okawa<sup>11</sup>, Yohei Naito<sup>12</sup>, Ayumi Kaneuji<sup>13</sup>, Yuji Yasunaga<sup>14</sup>, Kenji Ohzono<sup>15</sup>

<sup>1</sup>Laboratory for Statistical and Translational Genetics Analysis, RIKEN Center for Integrative Medical Sciences

<sup>2</sup>Department of Orthopaedic Surgery, Nagoya University Graduate School of Medicine

<sup>3</sup>The First Department of Internal Medicine, University of Occupational and Environmental Health, School of Medicine

<sup>4</sup>Graduate School of Medical Science Kyoto Prefectural University of Medicine

<sup>5</sup>Obihiro Kosei Hospital

<sup>6</sup>Division of Regenerative Medicine for Musculoskeletal System, Faculty of Medicine, University of Tsukuba

<sup>7</sup>Kido Hospital

<sup>8</sup>Department of Orthopaedic Surgery, Graduate School of Medical Science, Kanazawa University

<sup>9</sup>Kuriyama Red Cross Hospital, Department of Rheumatology

<sup>10</sup>Department of Orthopaedic Surgery, Osaka City University Graduate School of Medicine

<sup>11</sup>Orthopedic and Joint Surgery Center, Kurume Univ. Medical Center

<sup>12</sup>Department of Orthopaedic Surgery, Mie University Graduate School of Medicine

<sup>13</sup>Department of Orthopaedic Surgery, Kanazawa Medical University

<sup>14</sup>Hiroshima Prefectural Rehabilitation Center

<sup>15</sup>Department of Orthopaedic Surgery, Amagasaki Chuo Hospital

## b. Acknowledgement

We appreciate the contribution of following colleagues in the Japanese Research Committee on Idiopathic Osteonecrosis of the Femoral Head.

Yasuharu Nakashima<sup>1</sup>, Hiroshi Kataoka<sup>2</sup>, Makoto Kondo<sup>2</sup>, Tsuyoshi Asano<sup>3</sup>, Tohru Irie<sup>3</sup>, Norimasa Iwasaki<sup>3</sup>, Tatsuya Atsumi<sup>4</sup>, Shunji Kishida<sup>5</sup>, Shigeo Hagiwara<sup>6</sup>, Yukihide Iwamoto<sup>7</sup>, Satoshi Ikemura<sup>7</sup>, Ryosuke Yamaguchi<sup>7</sup>, Kazuyuki Karasuyama<sup>7</sup>, Kazuhiko Sonoda<sup>7</sup>, Yusuke Kubo<sup>7</sup>, Takeshi Utsunomiya<sup>7</sup>, Hiroyuki Hatanaka<sup>7</sup>, Shuji Baba<sup>7</sup>, Koichiro Kawano<sup>7</sup>, Noriko Yamamoto<sup>7</sup>, Ichiei Narita<sup>8</sup>, Koichi Akashi<sup>9</sup>, Hiroshi Tsukamoto<sup>10</sup>, Yojiro Arinobu<sup>11</sup>, Mitsuteru Akahoshi<sup>12</sup>, Hiroki Mitoma<sup>11</sup>, Masahiro Ayano<sup>13</sup>, Atsushi Fujie<sup>14</sup>, Yoshiaki Toyama<sup>14</sup>, Atsushi Funayama<sup>14</sup>, Kunihiro Yamaoka<sup>15</sup>, Hironari Hanaoka<sup>16</sup>, Katsunori Ikari<sup>17</sup>, Hisashi Yamanaka<sup>17</sup>, Tetsuji Hosozawa<sup>17</sup>, Shigeki Momohara<sup>17</sup>, Fumio Sekiya<sup>18</sup>, Masakazu Matsushita<sup>18</sup>, Megumi Matsushashi<sup>19</sup>, Kazuhide Tanimura<sup>19</sup>, Takashi Sakai<sup>20</sup>, Wataru Ando<sup>21</sup>, Takashi Nishii<sup>21</sup>, Masaki Takao<sup>21</sup>, Ryosuke Nakanishi<sup>22</sup>, Yukiharu Hasegawa<sup>23</sup>, Kazuyoshi Saito<sup>24</sup>, Kazuhisa Nakano<sup>25</sup>, Tetsuya Sakamoto<sup>26</sup>, Keiichiro Ueshima<sup>27</sup>, Yoshitomo Kajino<sup>28</sup>, Tomomichi Kajino<sup>29</sup>, Hiroaki Nakamura<sup>30</sup>, Shigekazu Mizokawa<sup>30</sup>, Shinichiro Kume<sup>31</sup>, Akihiro Sudo<sup>32</sup>, Masahiro Hasegawa<sup>32</sup>, Toru Ichiseki<sup>33</sup>, Takuma Yamasaki<sup>34</sup>

<sup>1</sup>Department of Orthopaedic Surgery, Graduate School of Medical Sciences, Kyushu University

<sup>2</sup>Department of Rheumatology & Clinical Immunology, Sapporo City General Hospital

<sup>3</sup>Department of Orthopaedic Surgery, Faculty of Medicine and Graduate School of Medicine, Hokkaido University

<sup>4</sup>Department of Rheumatology, Endocrinology and Nephrology, Faculty of Medicine and Graduate School of Medicine, Hokkaido University

<sup>5</sup>Department of Orthopaedic Surgery, Seirei Sakura Citizen Hospital

<sup>6</sup>Department of Orthopaedic Surgery, Graduate School of Medicine, Chiba University

<sup>7</sup>Department of Orthopaedic Surgery, Graduate School of Medical Sciences, Kyushu University

<sup>8</sup>Division of Clinical Nephrology and Rheumatology, Kidney Research Center, Niigata University Graduate School of Medical and Dental Sciences.

<sup>9</sup>Faculty of Medical Sciences, Kyushu University

<sup>10</sup>Shin-Kokura Hospital

<sup>11</sup>Kyushu University Hospital

<sup>12</sup>Faculty of Medicine, Saga University

<sup>13</sup>Graduate School of Medical Sciences, Kyushu University

<sup>14</sup>Department of Orthopaedic Surgery, Keio University School of Medicine

<sup>15</sup>Department of Rheumatology and Infectious Diseases, Kitasato University School of Medicine

<sup>16</sup>Division of Rheumatology, Department of Internal Medicine, Keio University School of Medicine

<sup>17</sup>Institute of Rheumatology, Tokyo Women's Medical University, Tokyo, Japan

- <sup>18</sup>Department of Internal Medicine and Rheumatology, Juntendo University School of Medicine
- <sup>19</sup>Hokkaido Medical Center for Rheumatic Diseases
- <sup>20</sup>Department of Orthopaedic Surgery, Yamaguchi University Graduate School of Medicine
- <sup>21</sup>Department of Orthopaedic Medical Engineering, Osaka University Graduate School of Medicine
- <sup>22</sup>Department of Orthopaedic Surgery, Fujigaoka Hospital, Showa University School of Medicine
- <sup>23</sup>Department of Rehabilitation, Kansai University of Welfare Science, Osaka, Japan
- <sup>24</sup>Tobata General Hospital
- <sup>25</sup>The First Department of Internal Medicine, University of Occupational and Environmental Health, Japan
- <sup>26</sup>Department of Orthopaedic Surgery, Faculty of Medicine, Fukuoka
- <sup>27</sup>Kyoto interdisciplinary institute hospital of community medicine
- <sup>28</sup>Department of Orthopaedic Surgery, Graduate School of Medical Science, Kanazawa University
- <sup>29</sup>Tonan hospital, Department of orthopaedic surgery
- <sup>30</sup>Department of Orthopaedic Surgery, Osaka City University Graduate School of Medicine
- <sup>31</sup>Orthopedis and Joint Surgery Center, Kurume Univ. Medical Center
- <sup>32</sup>Department of Orthopaedic Surgery, Mie University Graduate School
- <sup>33</sup>Department of Orthopaedic Surgery, Kanazawa Medical University
- <sup>34</sup>Department of Orthopaedic Surgery, National Hospital Organization Kure Medical Center and Chugoku Cancer Center



### c. Web resources

The software used has been described in details in Online Methods section. Software and resources included:

Pre-phasing: SHAPEITv2/v2.3, [https://mathgen.stats.ox.ac.uk/genetics\\_software/shapeit](https://mathgen.stats.ox.ac.uk/genetics_software/shapeit)

Pre-phasing: Eagle v2, <https://data.broadinstitute.org/alkesgroup/Eagle/>

Imputation: minimac3/4, Michigan Imputation Server, <https://imputationserver.sph.umich.edu>

Imputation: IMPUTEv2/v4, <https://jmarchini.org/impute-4/>

Association: EPIACTSv3.3 (EMMAX), <https://github.com/statgen/EPIACTS>

Association: Plinkv1.9, <https://www.cog-genomics.org/plink/>

Association: SNPTTESTv2.5, [https://mathgen.stats.ox.ac.uk/genetics\\_software/snptest](https://mathgen.stats.ox.ac.uk/genetics_software/snptest)

Meta-analysis: metal, <https://genome.sph.umich.edu/wiki/METAL>

Conditional analysis: GCTAv1.9, <https://cnsgenomics.com/software/gcta/#Overview>

Bayesian statistical fine-mapping, FINEMAP v1.4, <http://www.christianbenner.com>

Visualization: LocusZoom, [https://genome.sph.umich.edu/wiki/LocusZoom\\_Standalone](https://genome.sph.umich.edu/wiki/LocusZoom_Standalone)

Heritability estimation: LDSC, <https://github.com/bulik/ldsc>

**Supplementary Figure 1 | Quantile-quantile (QQ) plots of the meta-analysis association  $P$  values for all variants (left) and the variants outside of known SLE loci (right).** X-axis is the minus  $\log_{10}$ -transformed expected  $P$  values while the y-axis is the minus  $\log_{10}$ -transformed observed  $P$  values in the meta-analysis. The genomic control inflation factor ( $\lambda_{gc}$ ) is shown in the top of each figure.

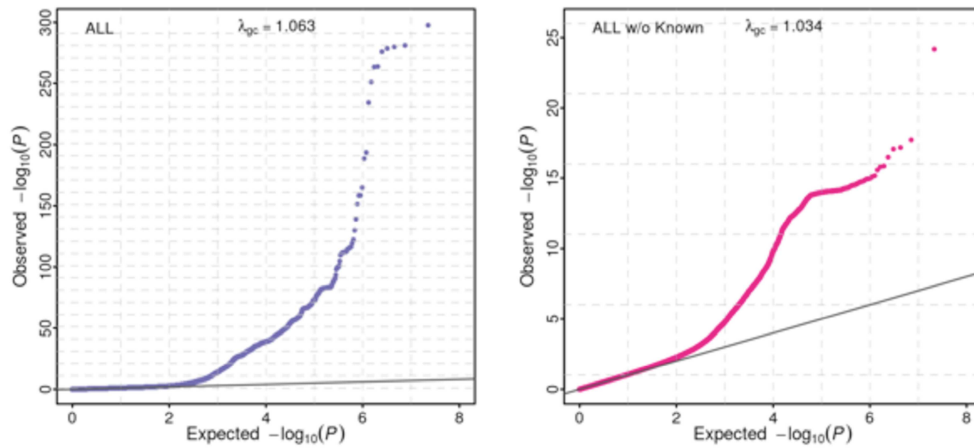

**Supplementary Figure 2 | Regional association plots for the 113 SLE genomic loci.** Each circle represents a variant that is plotted with its minus  $\log_{10}$ -transformed association  $P$  value and chromosomal position. Recombination rates are estimated from the International HapMap Project data, and gene annotations are taken from the hg19 UCSC Genome Browser. The SLE loci were numbered based on chromosomal position as from “region 1” to “region 113”. The first 85 loci (such as region 1, region 6, and region 7) display single lead variants as purple diamonds. The other non-lead variants were colored by  $r^2$  values with the lead variant (estimated from 7,021 unrelated Chinese controls). The following remaining 28 loci with multiple distinct association signals (such as region 2, region 3, and region 4) highlight variants associated with the first, second, third, and fourth distinct signals in red, blue, green, and purple, respectively. The lead variant for each distinct association signal were represented as diamond. For *HLA* (region 41) and 7q11.23 (region 50), we show regional plots using the most significant single variants.

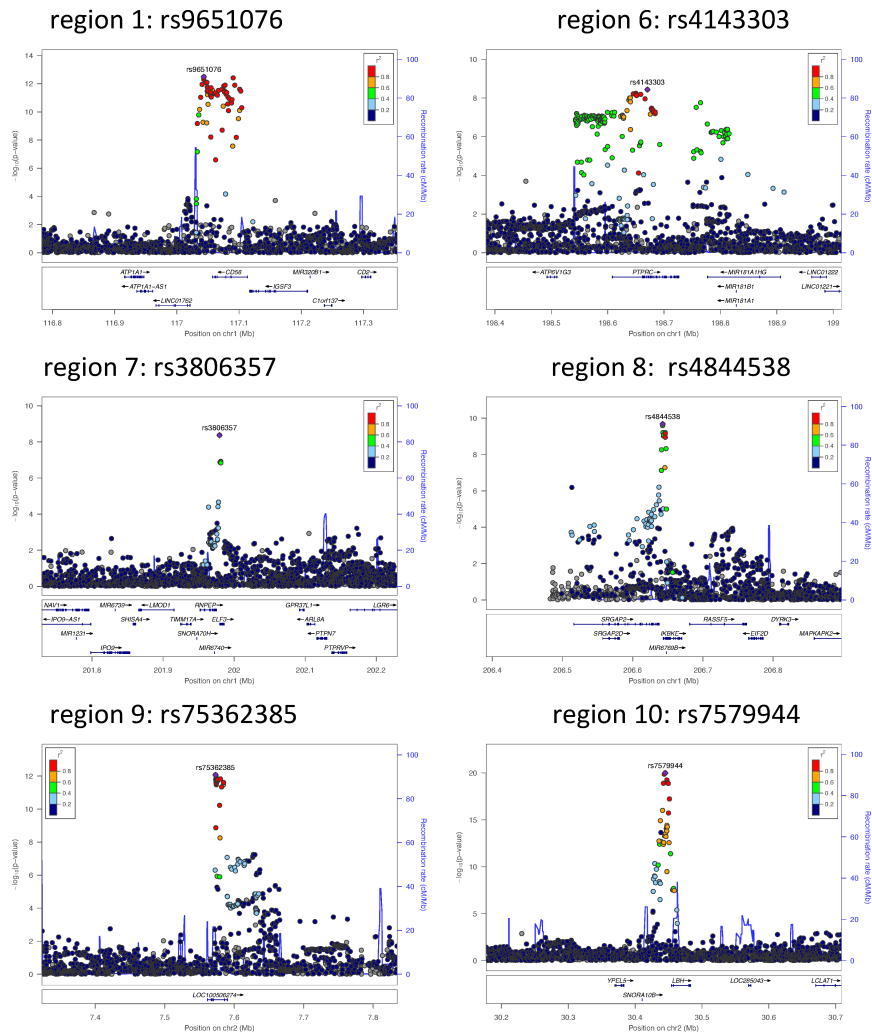

region 11: rs13385731

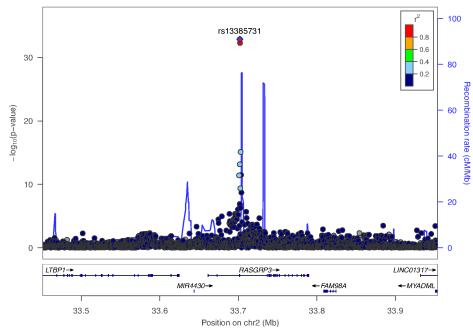

region 12: rs11126034

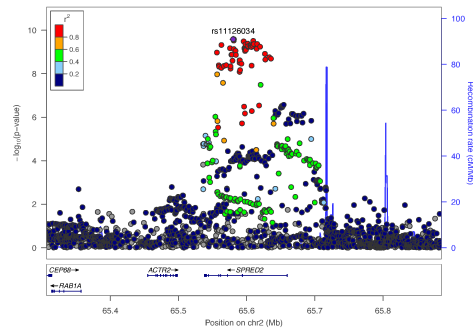

region 13: rs10207954

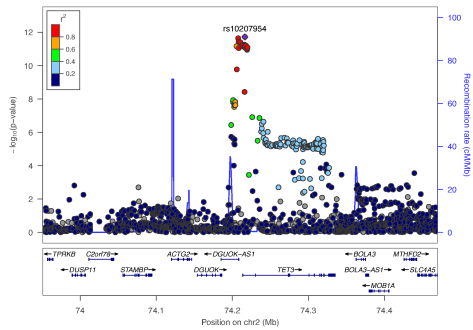

region 14: rs73954925

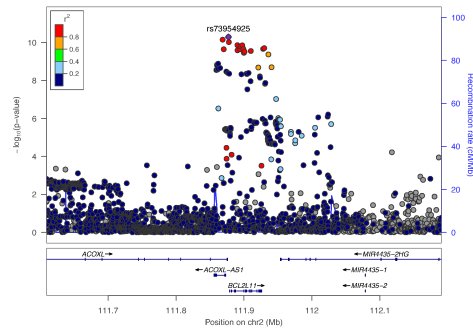

region 15: rs218174

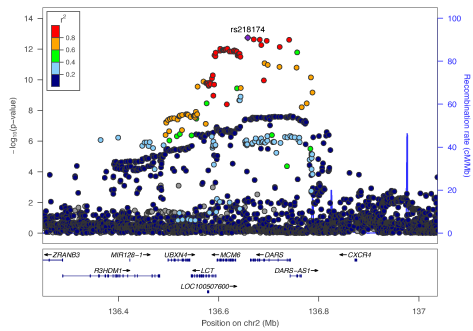

region 16: rs11679244

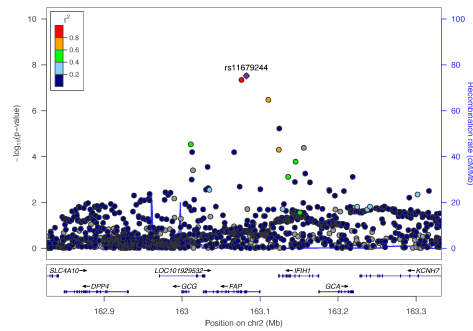

region 18: rs7572733

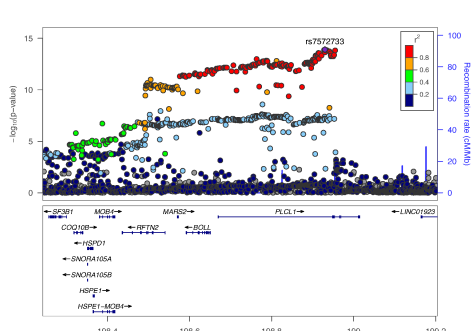

region 20: rs438613

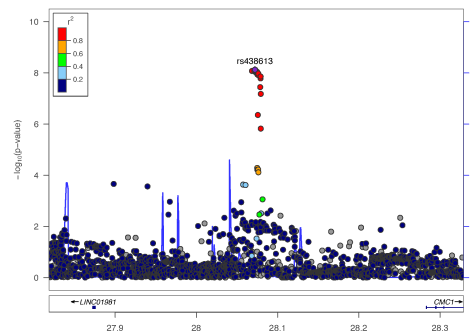

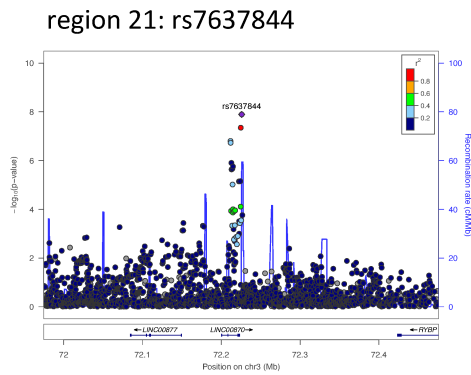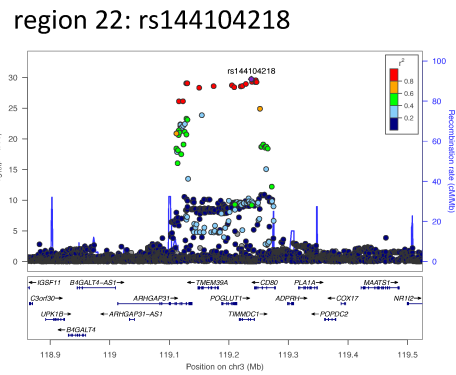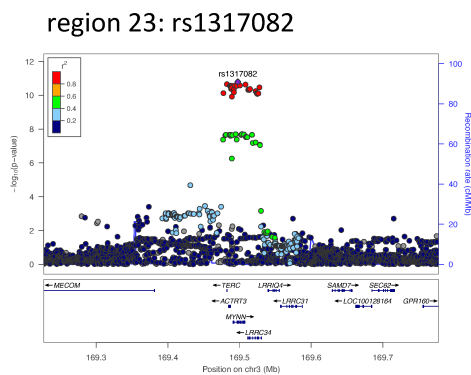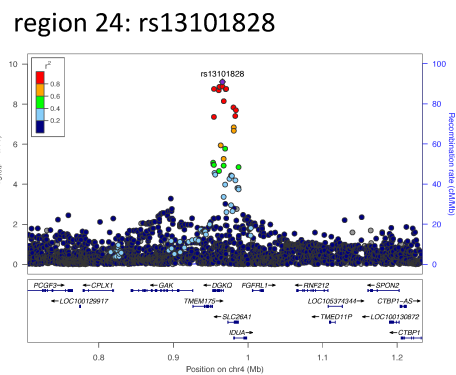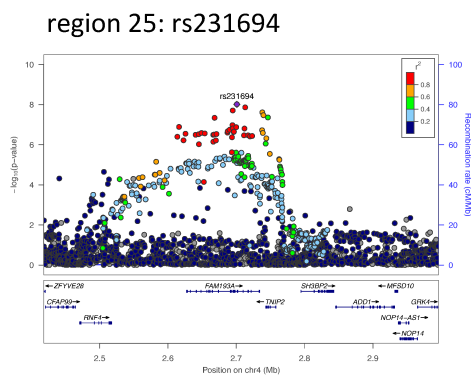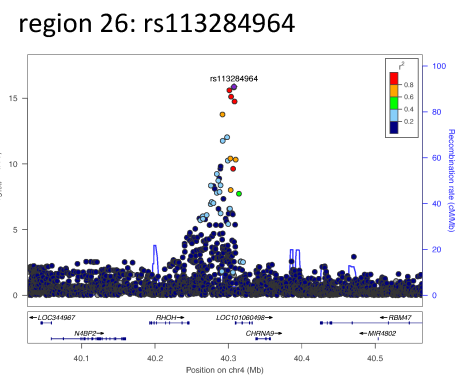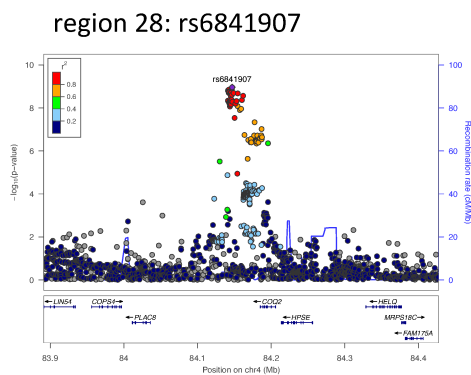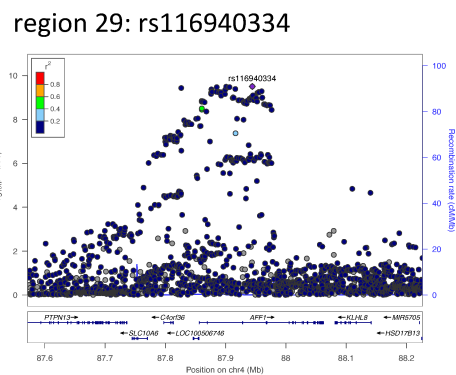

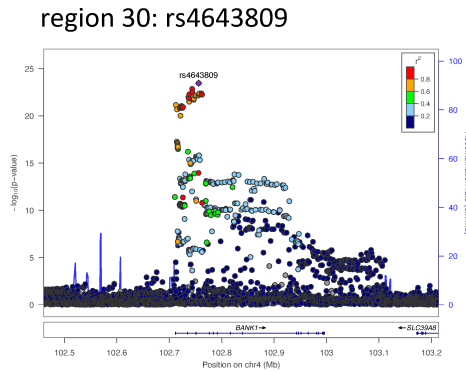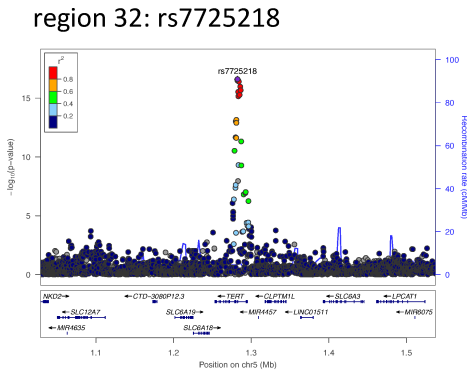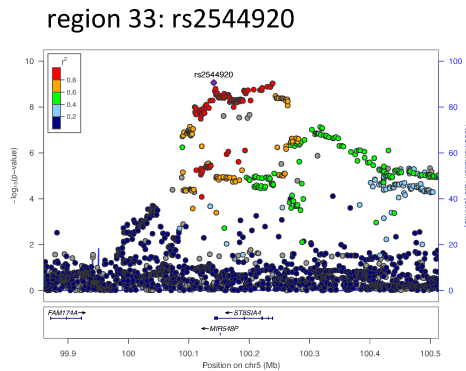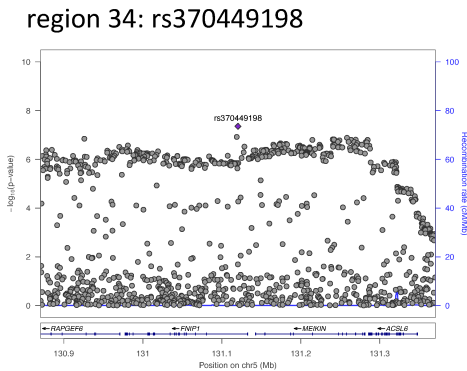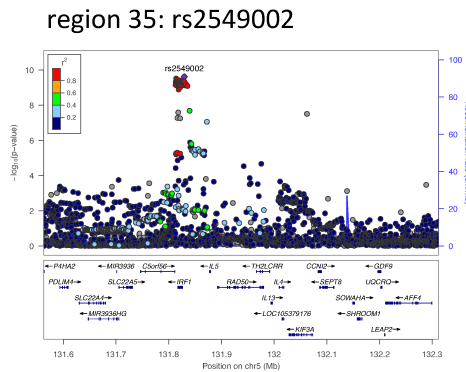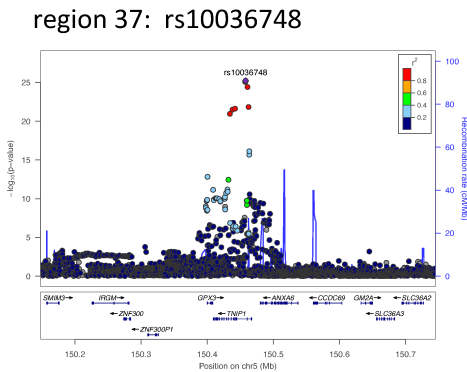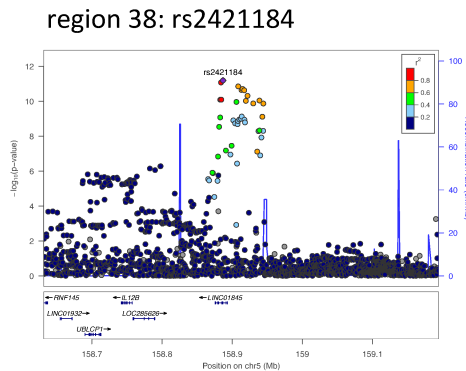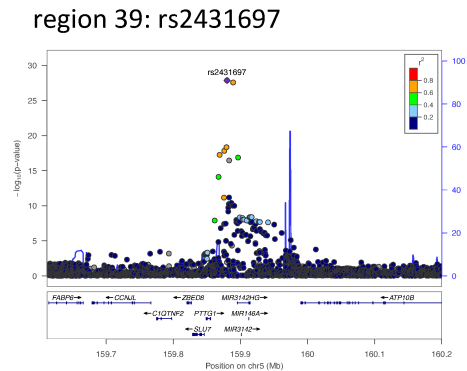

region 40: rs9503037

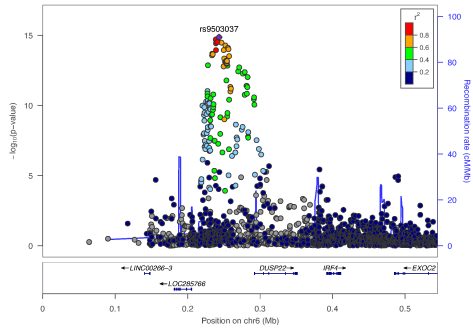

region 41: rs9268807

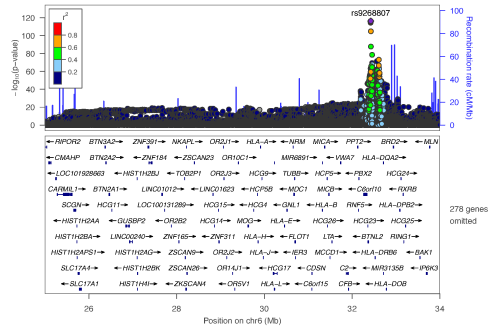

region 45: rs548234

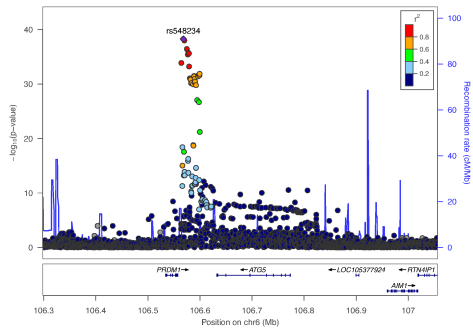

region 46: rs9488914

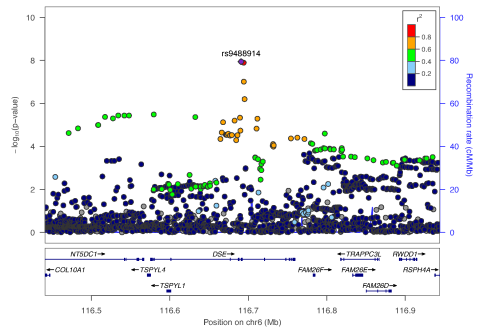

region 48: rs9322454

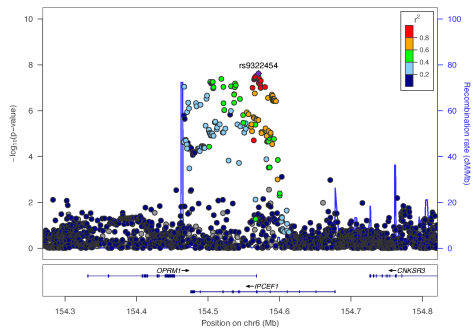

region 50: rs117026326

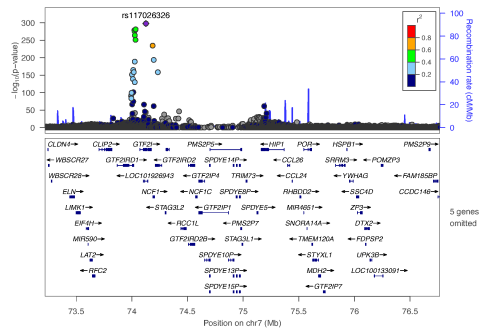

region 52: rs2736332

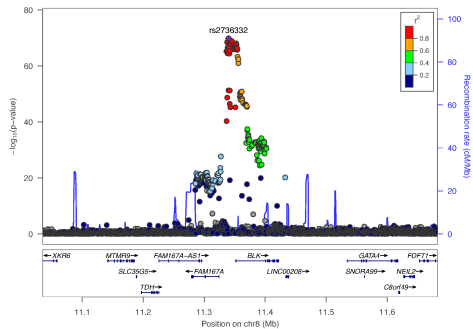

region 53: rs2272736

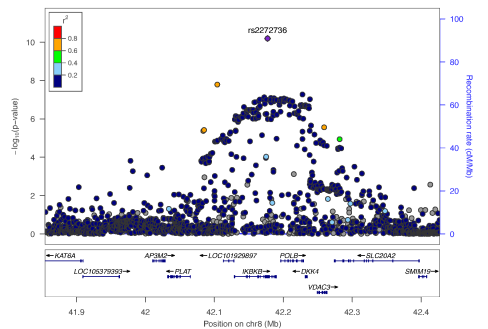

region 54: rs142937720

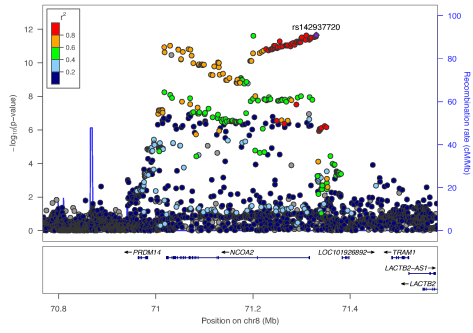

region 55: rs17374162

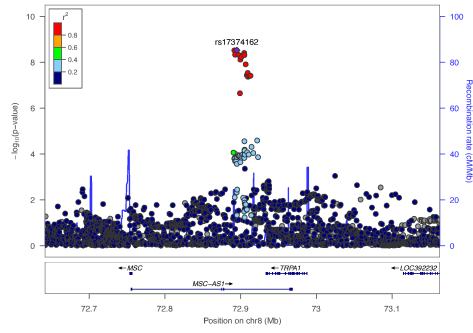

region 56: rs16902895

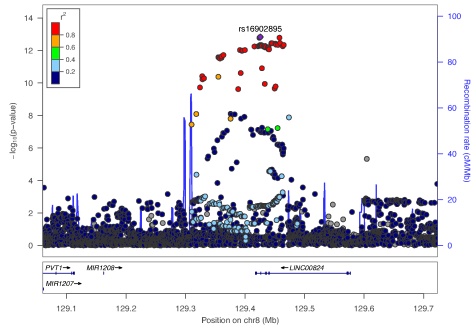

region 57: rs1887428

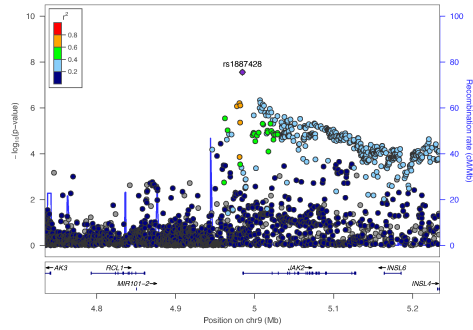

region 58: rs7858766

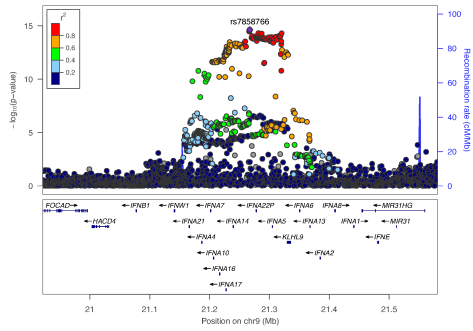

region 59: rs77448389

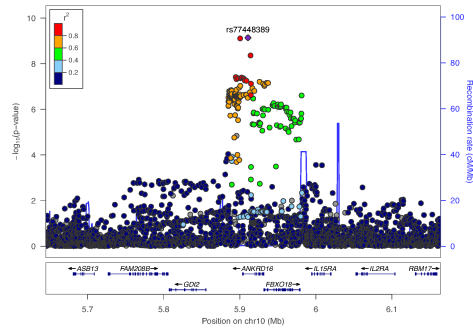

region 61: rs7902146

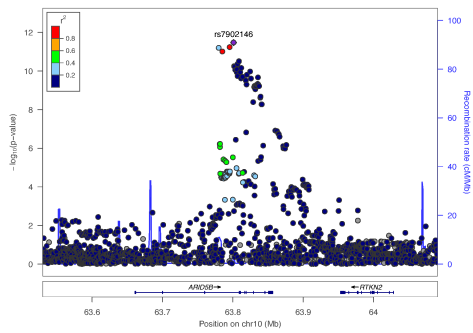

region 62: rs10995261

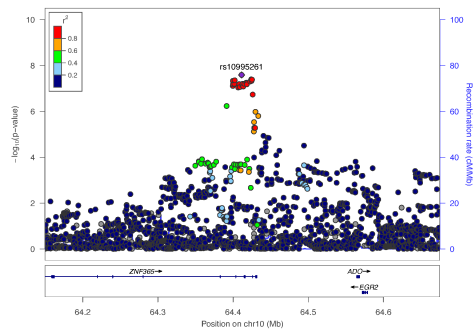



region 63: rs10823829

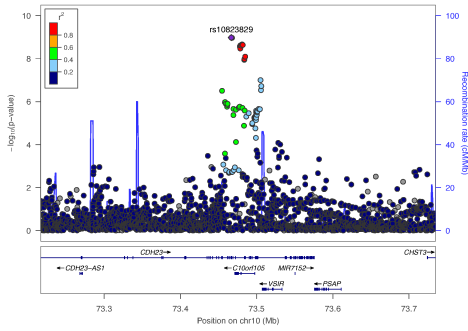

region 65: rs58164562

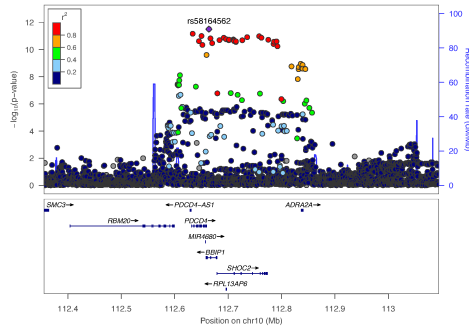

region 66: rs3750996

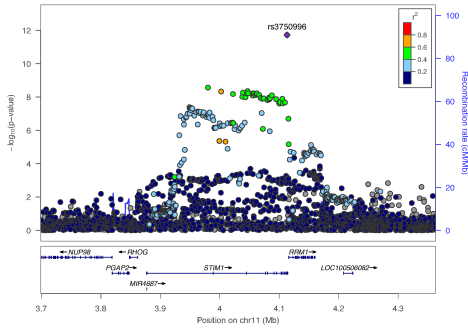

region 67: rs77885959

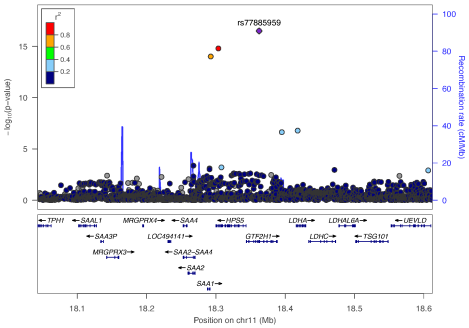

region 69: rs10896045

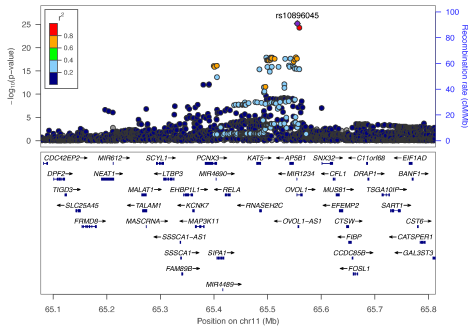

region 70: rs4930642

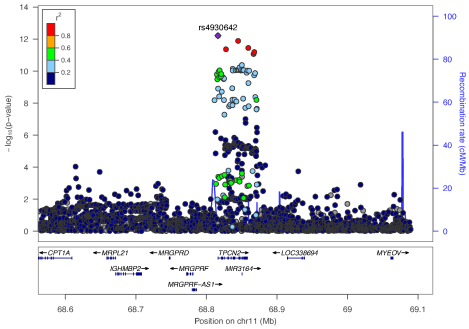

region 71: rs77971648

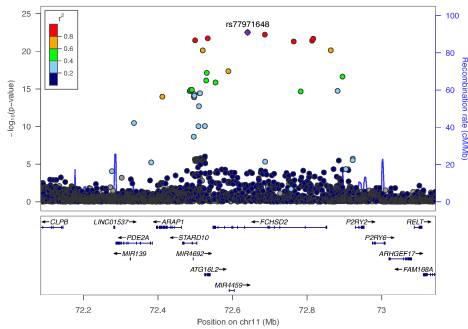

region 74: rs2540119

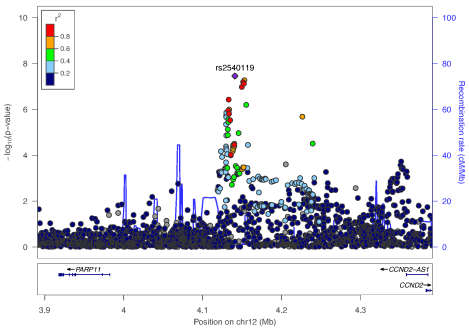

region 76: rs4622329

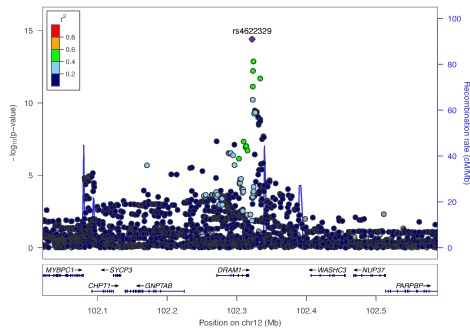

region 77: rs6539078

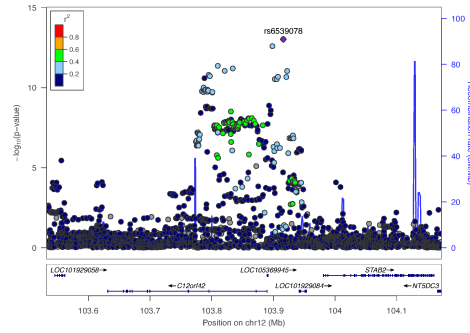

region 80: rs11059928

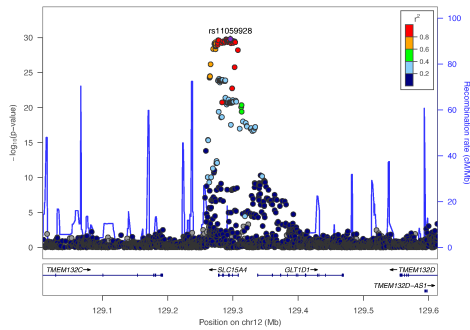

region 81: rs200521476

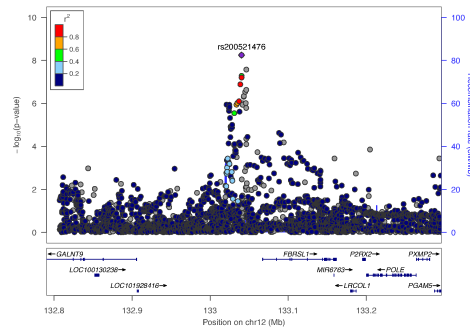

region 82: rs57141708

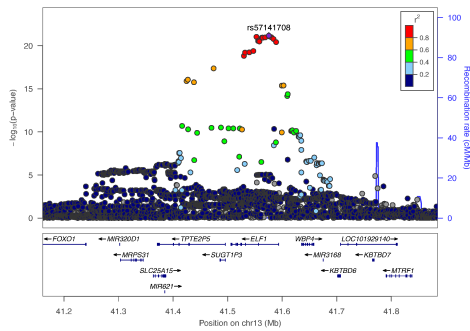

region 83: rs2819426

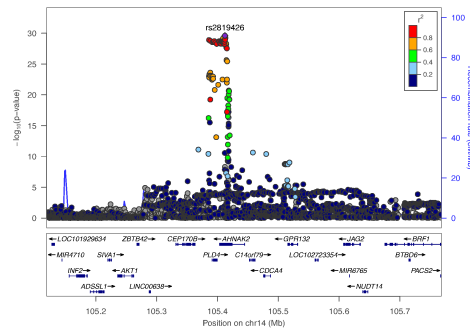

region 85: rs11553760

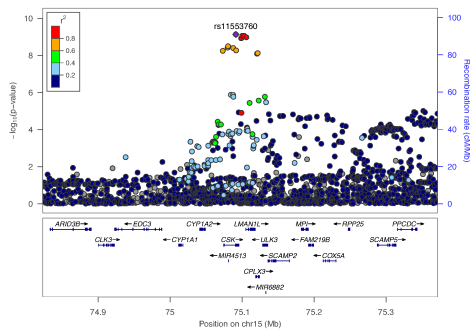

region 86: rs35985016

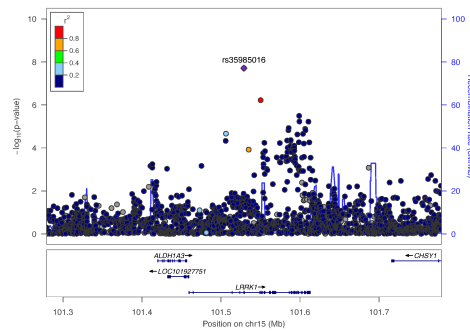

region 87: rs34361002

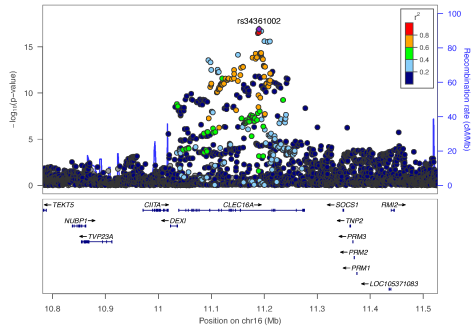

region 88: rs79401250

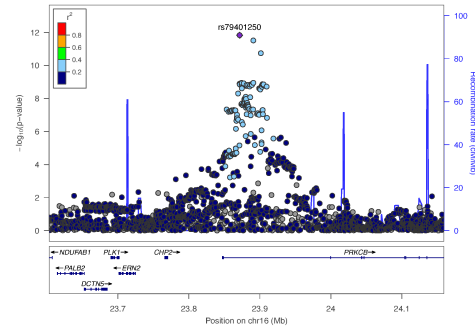

region 89: rs534645300

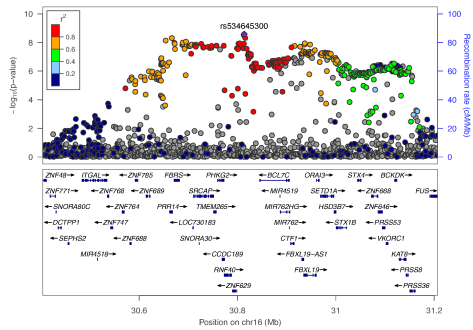

region 90: rs11288784

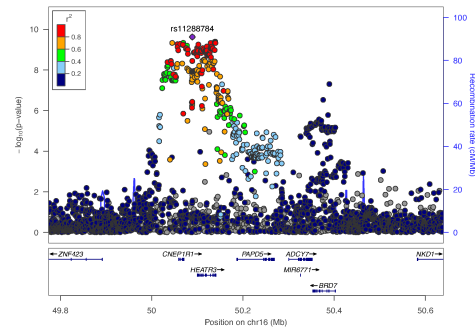

region 91: rs669763

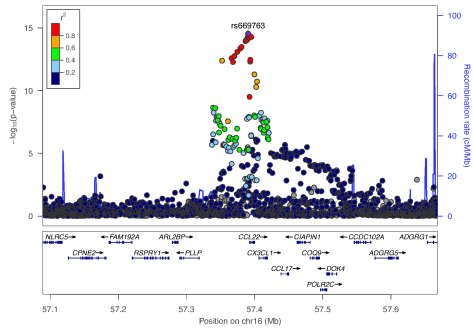

region 92: rs28410471

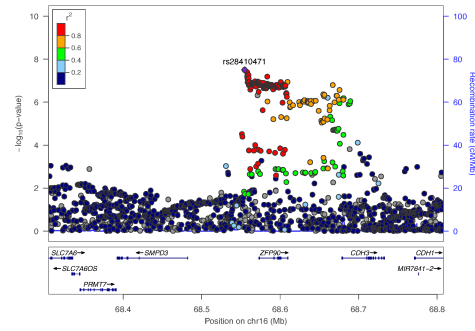

region 93: rs11376510

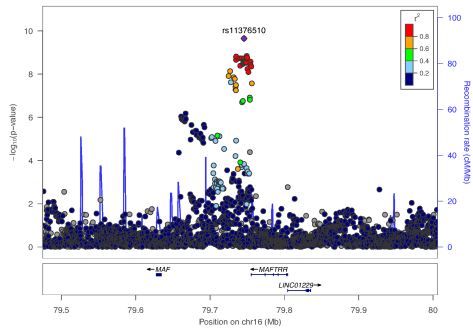

region 95: rs61759532

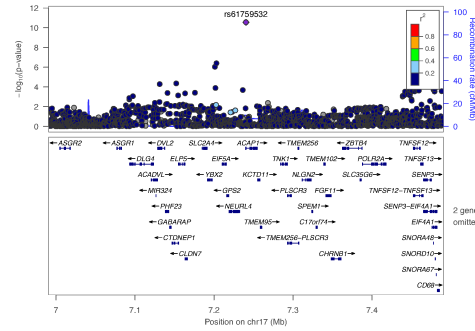

region 96: rs35966917

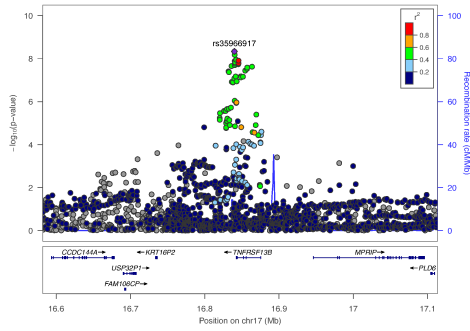

region 97: rs2671655

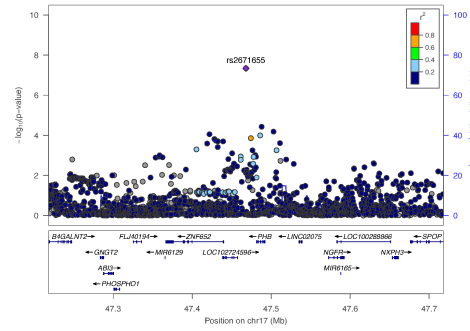

region 98: rs113417153

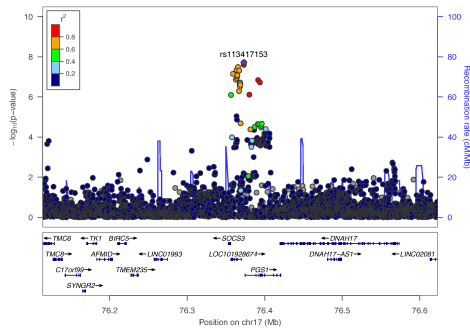

region 99: rs1788097

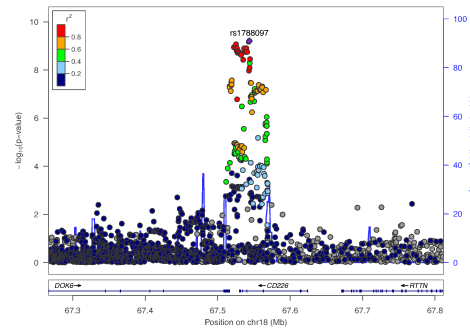

region 100: rs118075465

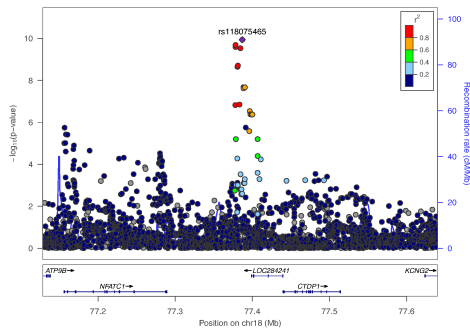

region 101: rs2238577

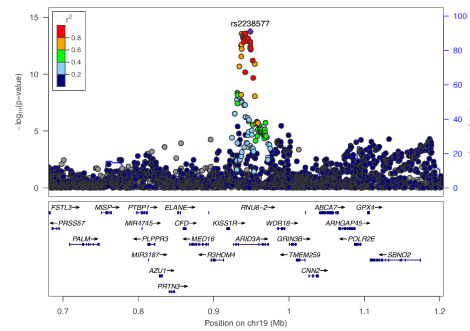

region 102: rs5826945

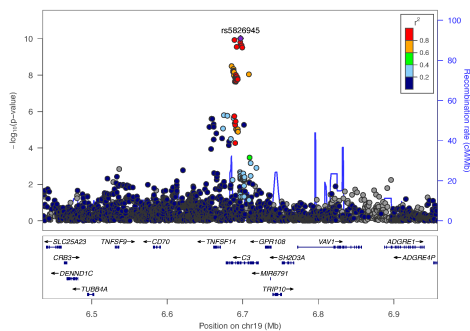

region 103: rs55882956

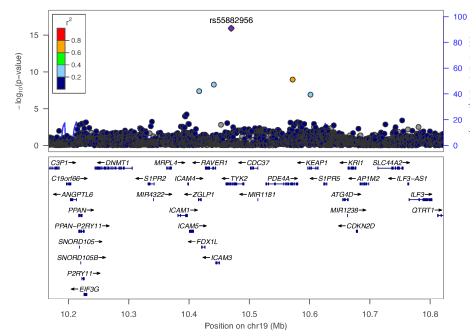



region 2: rs116785379 (1:157108159:G:C), rs112806509(1:157502015:AT:A), and rs2317230(1:157674997:G:T)

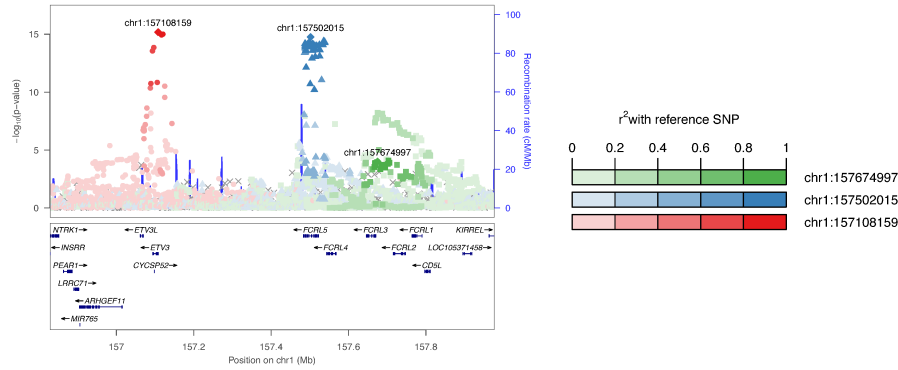

region 3: rs12120358(1:161444369:A:T), rs111994823(1:161470274:T:C), rs76107698(1:161569829:G:C), and rs75773410(1:161625798:A:G)

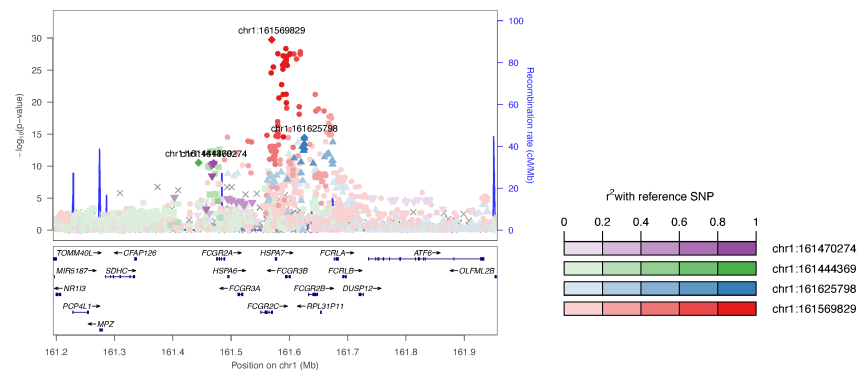

region 4: rs2205960 (1:173191475:G:T), rs117278480 (1:173210789:A:G), rs844646 (1:173216373:A:G), and rs2039982 (1:173359187:C:T)

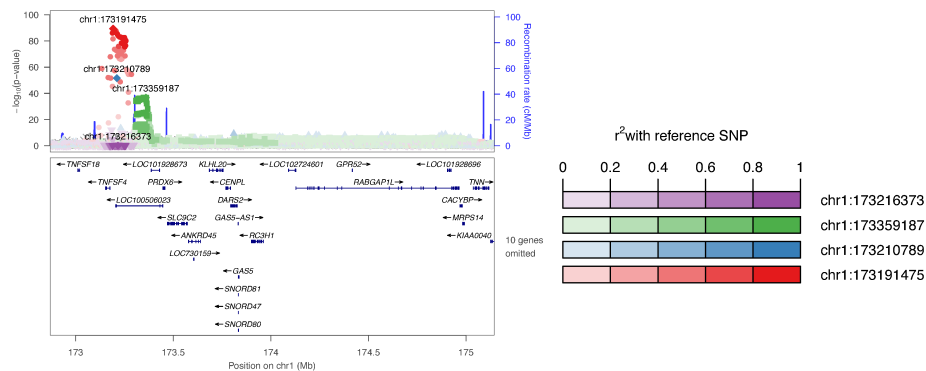

region 5: rs13306575 (1:183532437:G:A) and rs66977652 (1:183540215:TA:T)

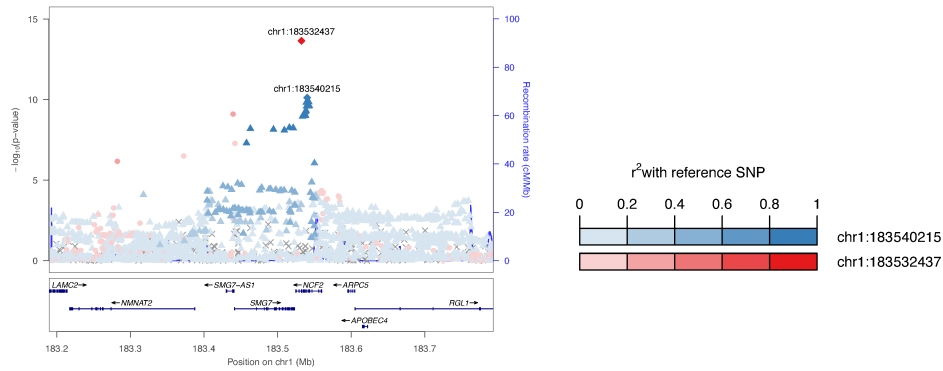

region 17: rs11889341 (2:191943742:C:T) and rs71030321 (2:191948986:T:TA)

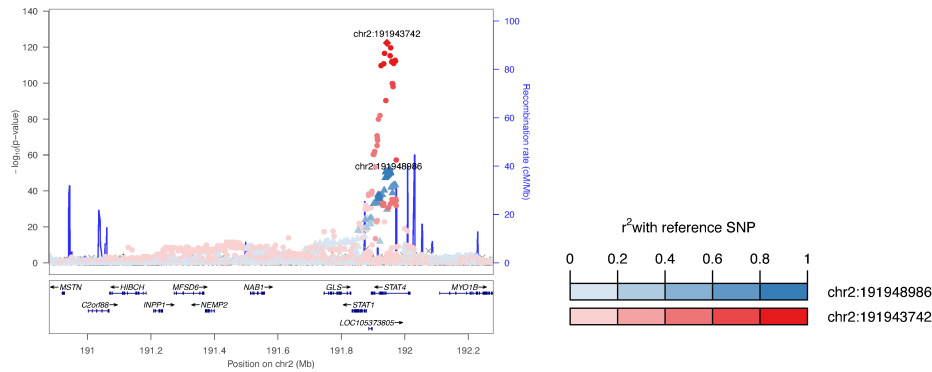

region 19: rs7565158 (2:213593970:G:T) and rs2371790 (2:213884666:A:G)

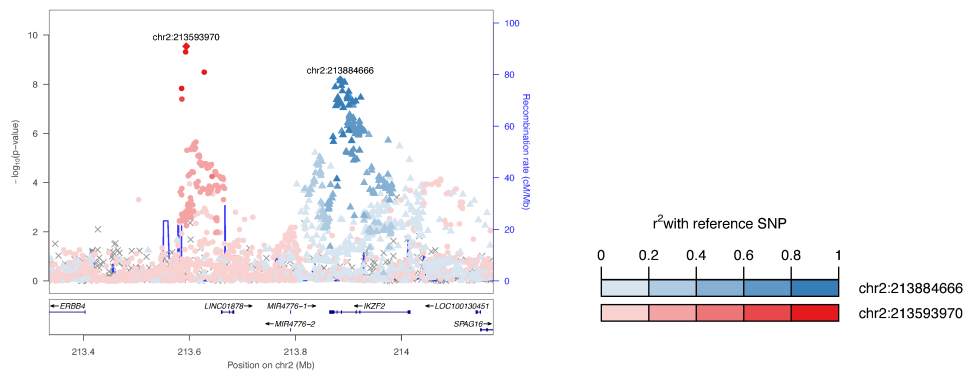

region 27: rs6533951 (4:79644279:A:G) and rs2867700 (4:81084349:A:G)

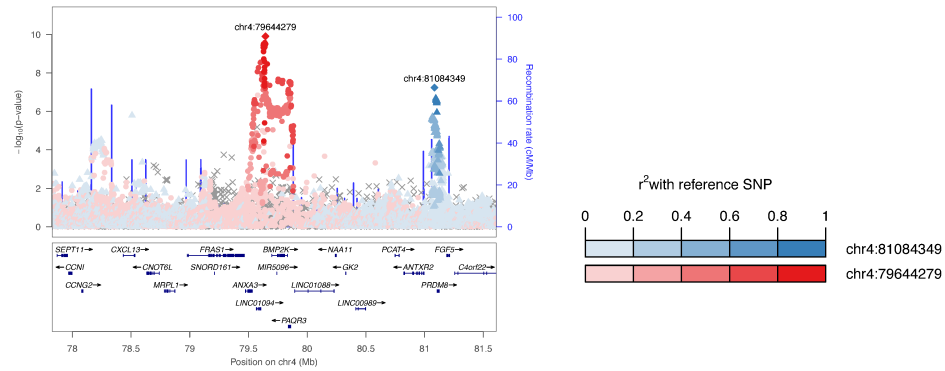

region 31: rs956237 (4:109046960:G:A) and rs57634688 (4:109111805:C:T)

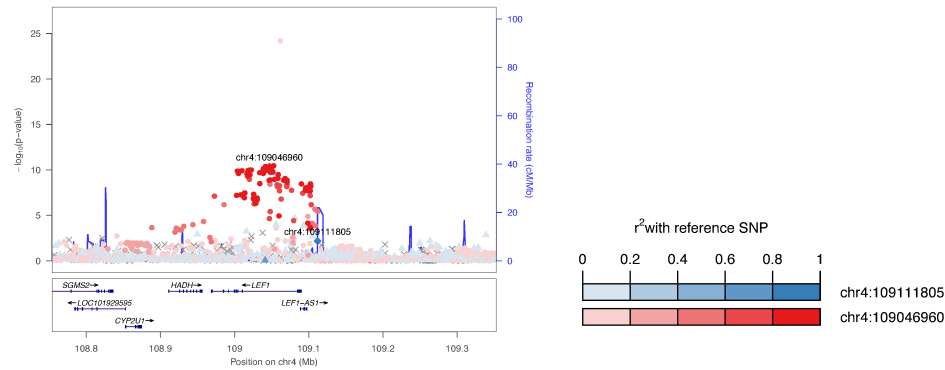

region 36: rs115267018 (5:133421109:G:C), rs6874758 (5:133429192:G:C), and rs138305363 (5:133714873:A:G)

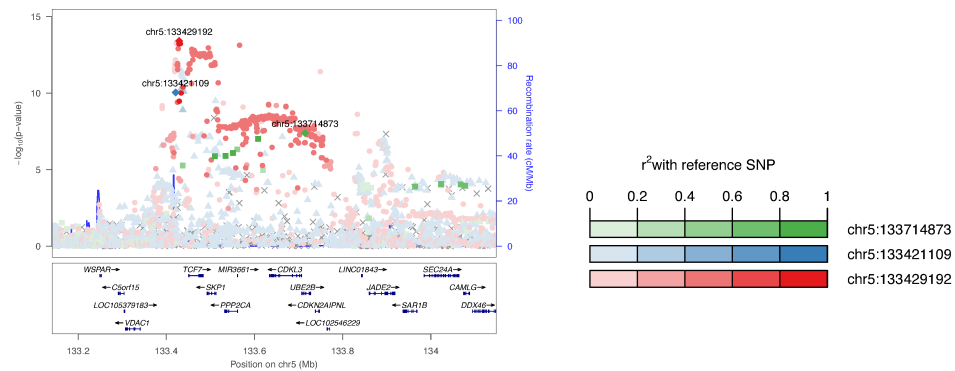



region 42: rs111658701 (6:34228565:T:C), rs6457796 (6:34828553:T:C), and rs10484578 (6:35246319:A:G)

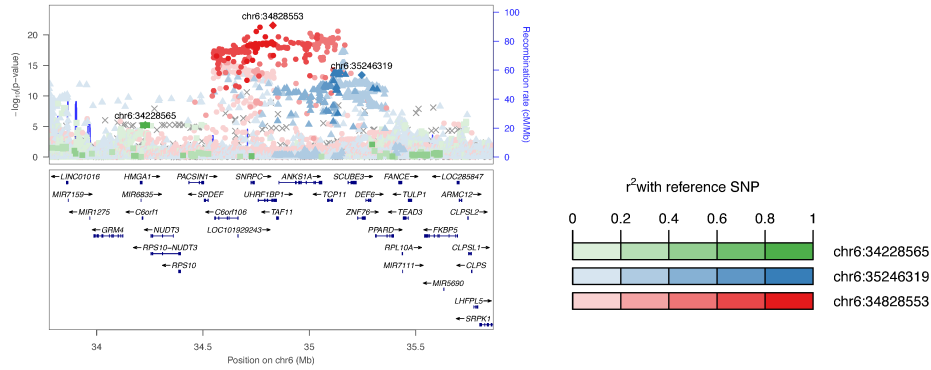

region 43: rs56285849 (6:36704293:T:C) and rs34868004 (6:36715031:C:CA)

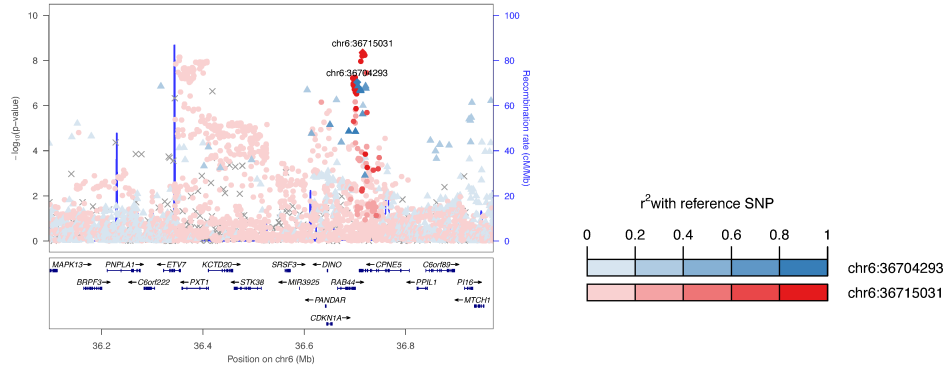

region 44: rs3857496 (6:90719164:T:C) and rs597325 (6:91002494:A:G)

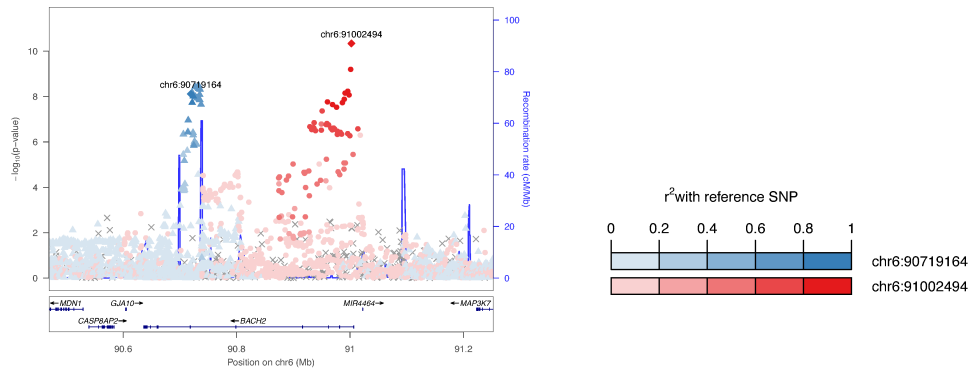

region 47: rs75163761 (6:138157489:C:T) and rs9494894 (6:138228520:T:C)

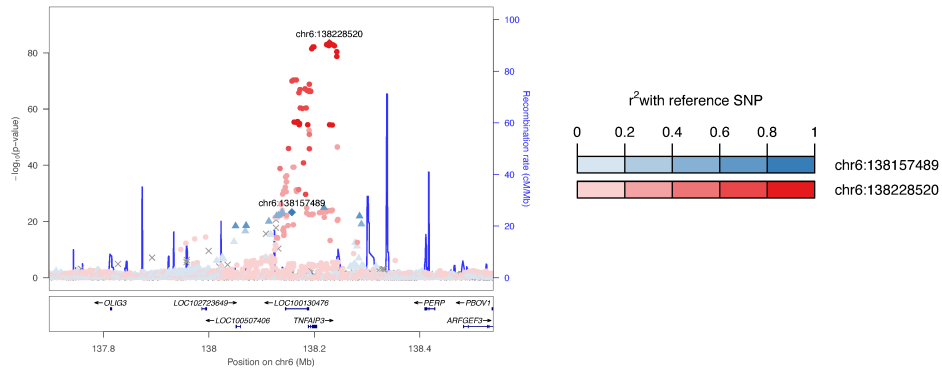

region 49: rs62447171 (7:50309890:G:A) and rs10239000 (7:50332196:A:G)

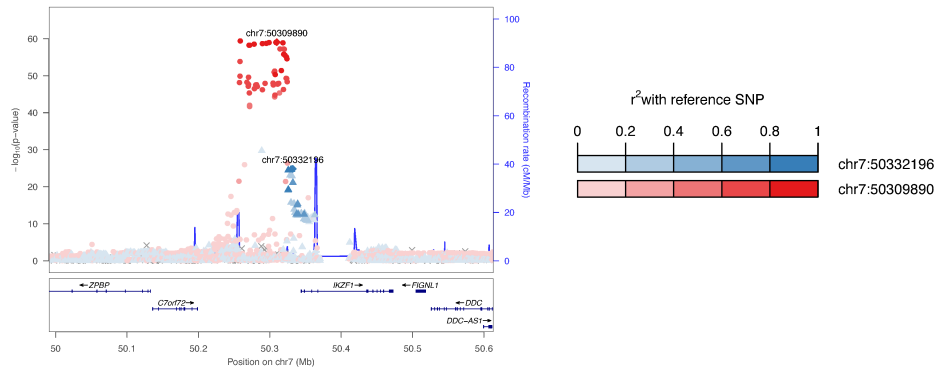

region 51: rs3757387 (7:128576086:T:C), rs41298401 (7:128578307:C:G), rs78724056 (7:128654051:G:T), and rs28364822 (7:128695982:T:A)

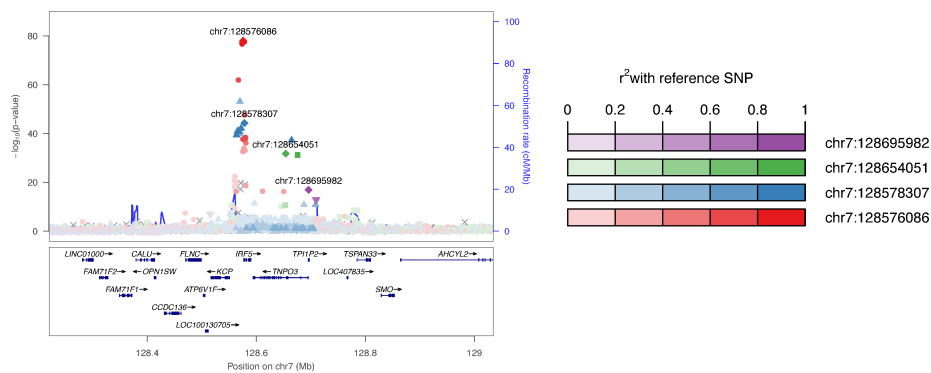

region 60: rs7072606 (10:49933974:T:C) and rs7097397 (10:50025396:G:A)

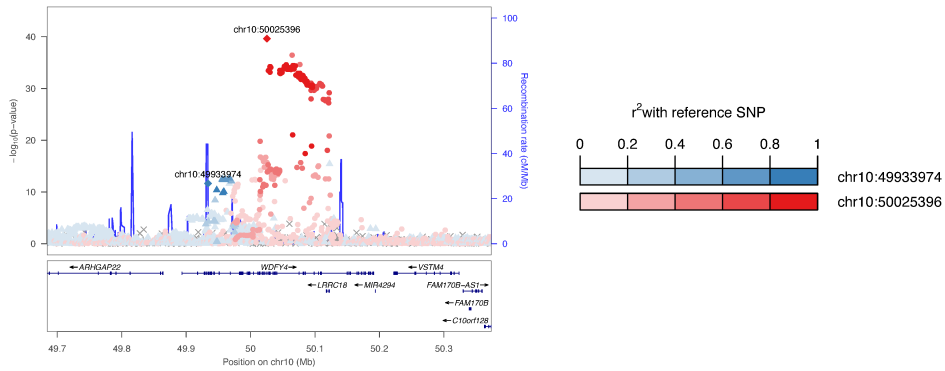

region 64: rs11599734 (10:103963397:C:G) and rs111447985 (10:105677911:C:A)

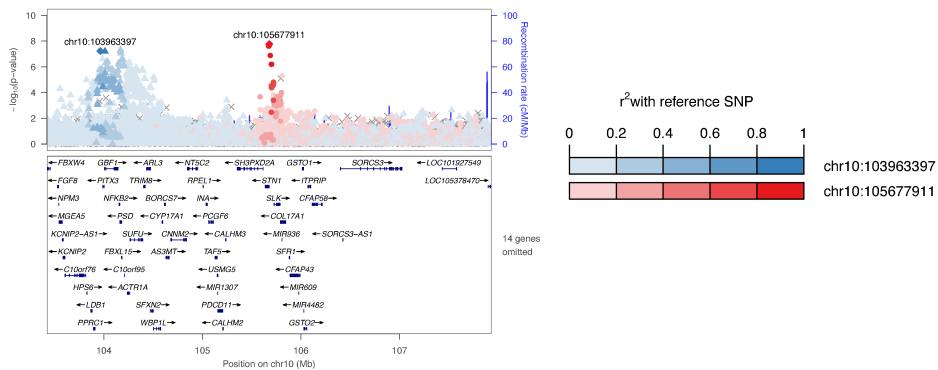

region 68: rs2732540 (11:35095486:A:G) and rs11032994 (11:35111157:G:A)

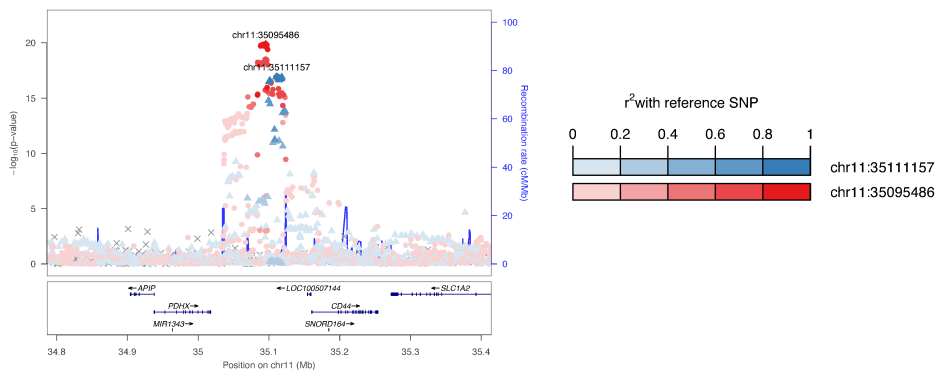

region 72: rs480958 (11:118577990:G:A) and rs4936441 (11:118725660:C:G)

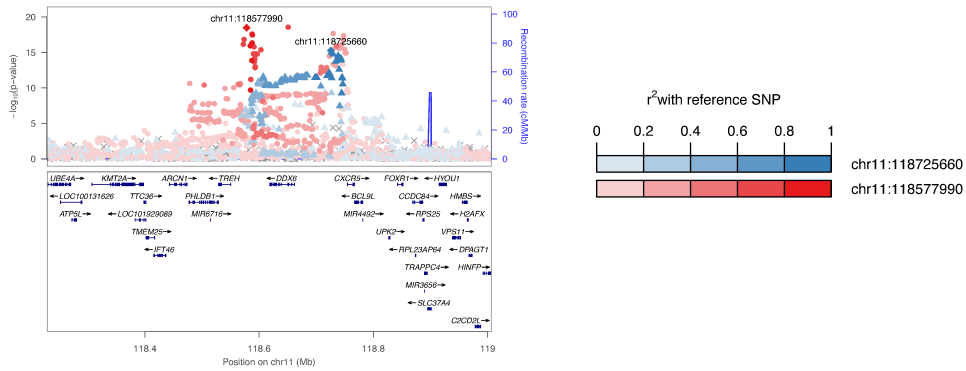

region 73: rs11501246 (11:128314424:A:G) and rs684150 (11:128594161:C:T)

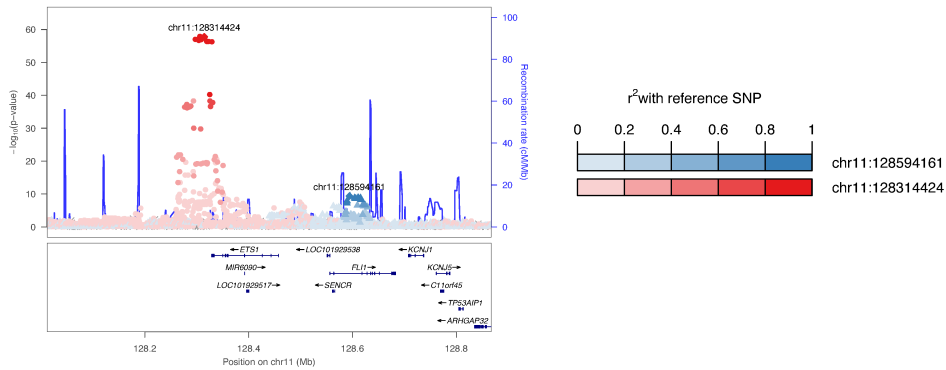

region 75: rs10845602 (12:12825237:A:G) and rs4251697 (12:12874462:G:A)

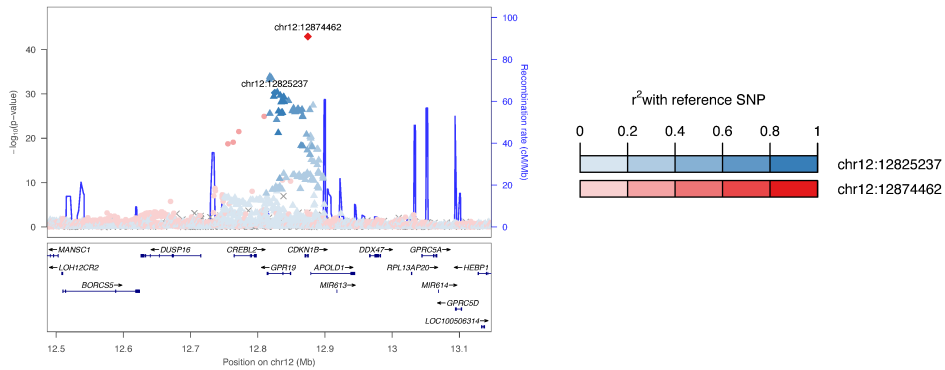

region 78: rs77465633 (12:111933545:C:A) and rs1131476 (12:113357209:G:A)

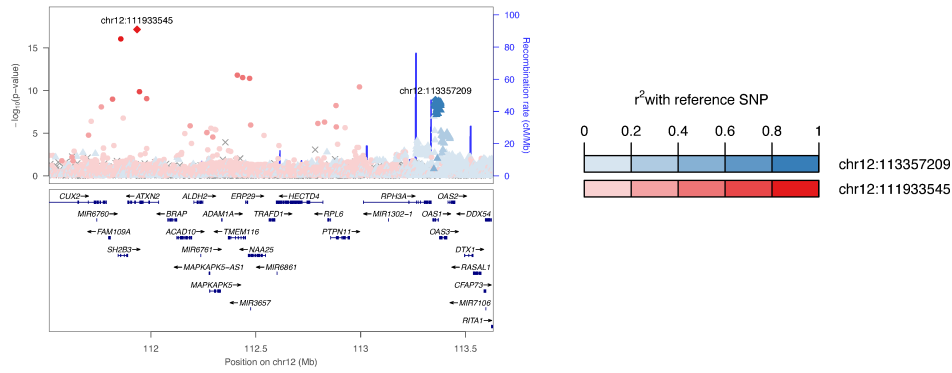

region 79: rs7139263 (12:118428976:G:A) and rs35743748 (12:121228629:C:CT)

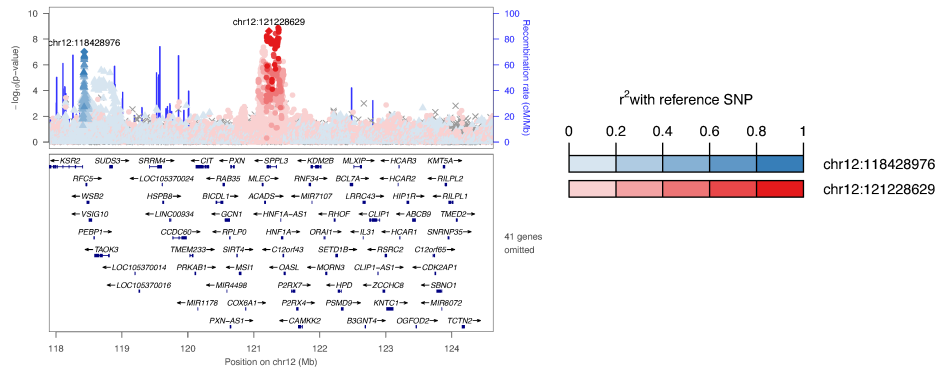

region 84: rs7170151 (15:38846678:C:T) and rs12900640 (15:38974548:A:C)

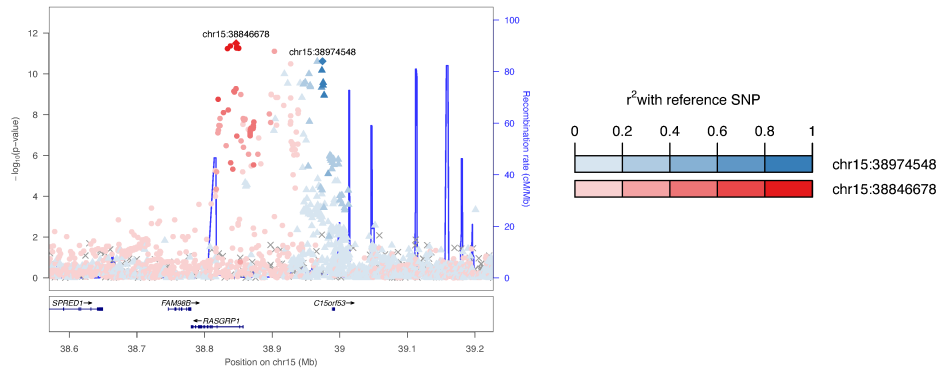

region 94: rs447632 (16:85967640:A:G) and rs11117432 (16:86019271:G:A)

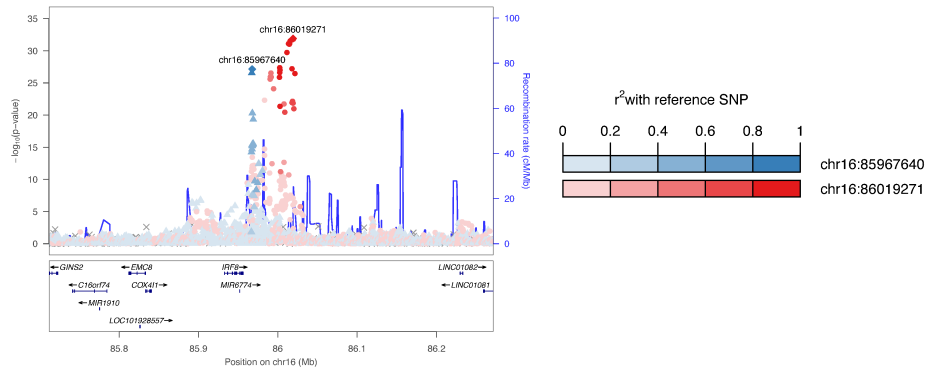

region 107: rs3794986 (19:52047314:G:T) and rs4801882 (19:52127053:G:A)

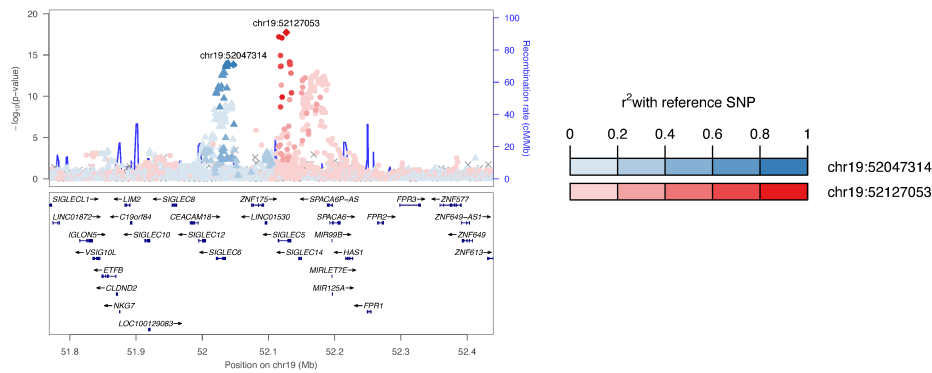

region 111: rs6641111 (X:12839790:C:G) and rs4830478 (X:12918288:G:A)

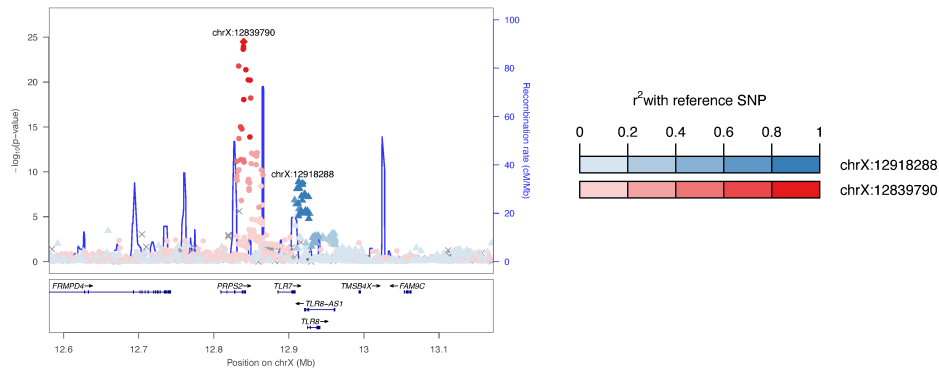

region 113: rs1059702 (X:153284192:A:G) and rs5945199 (X:153749857:G:A)

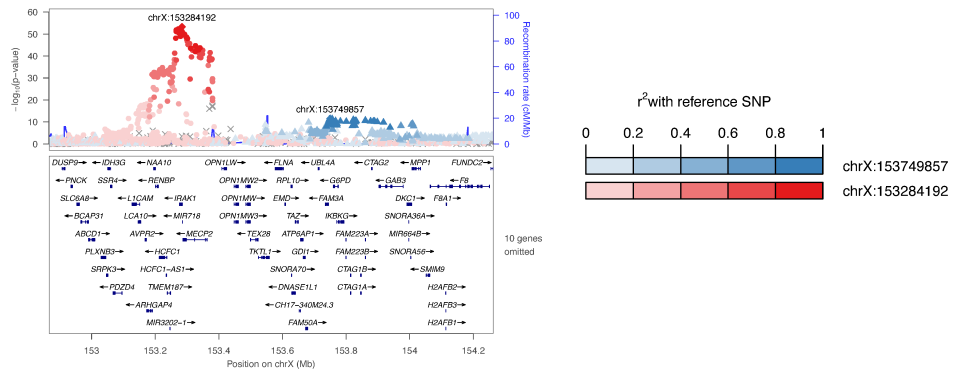

Supplementary Table 1 | Characteristics of the eight studies used in this meta-analysis

| Cohort             | Country     | Cases | Controls | Published      | SLE Criteria                            | Genotype Array                                                                                      | Pre-phasing | Genotype Imputation                       | Association Model            | Association Tool | Number of Variants | $\lambda_{gc}$ |
|--------------------|-------------|-------|----------|----------------|-----------------------------------------|-----------------------------------------------------------------------------------------------------|-------------|-------------------------------------------|------------------------------|------------------|--------------------|----------------|
| Hong Kong dataset1 | China       | 612   | 2193     | PMID: 27399966 | 1997ACR criteria                        | Illumina Human610-quad BeadChip                                                                     | SHAPEIT2    | IMPUTE2, 1KGP3                            | logistic                     | SNPTEST          | 9,786,691          | 1.029          |
|                    | Japan       | 1,177 | 140,256  | New            | diagnosed by collagen disease physician | IlluminaOmniExpressExome, IlluminaOmniExpress, IlluminaHumanExome                                   | Eagle2.4.1  | minimac4, 1KGP3+WGS(Japanese7k)           | logistic                     | PLINK2.0         | 10,049,723         | 1.044          |
| dataset2           | Japan       | 889   | 3,376    | PMID: 22291604 | 1997ACR criteria                        | Illumina HumanHap610-Quad Genotyping BeadChips control: Illumina HumanHap550v3 Genotyping BeadChips | Eagle2.4.1  | minimac4, 1KGP3+WGS(Japanese7k)           | logistic                     | PLINK2.0         | 9,945,421          | 1.029          |
| dataset3           | Japan       | 469   | 2,145    | PMID: 30679154 | 1997ACR criteria                        | Illumina Human Core Exome                                                                           | Eagle2.4.1  | minimac4, 1KGP3+WGS(Japanese7k)           | logistic                     | PLINK2.0         | 9,713,631          | 1.067          |
| KOR#1              | South Korea | 1877  | 32820    | New            | 1997ACR criteria                        | KoreanChip (Korean Biobank Array; Sci Rep. 2019;9(1):1382)                                          | Eagle2      | IMPUTE4, 1KGP phase3 + Korean WGS (n=397) | b.wald (cov: PC1 to 4 & sex) | EFACTS           | 10,934,114         | 1.046          |
| KOR#2              | South Korea | 358   | 4195     | PMID: 25533202 | 1997ACR criteria                        | Illumina 1M HumanOmni Array                                                                         | Eagle2      | IMPUTE4, 1KGP phase3 + Korean WGS (n=397) | b.wald (cov: PC1 to 4 & sex) | EFACTS           | 10,758,370         | 1.016          |
| CHN1               | China       | 1020  | 2917     | PMID: 19838193 | 1997ACR criteria                        | Illumina Human610-quad BeadChip                                                                     | Eagle2.4.1  | Michigan Imputation Server, 1KGP phase3   | EMMAX                        | EFACTS           | 8,842,696          | 0.981          |
| CHN2               | China       | 6975  | 7091     | New            | 1997ACR criteria                        | Infinium® Global Screening Array                                                                    | Eagle2.4.1  | Michigan Imputation Server, 1KGP phase3   | EMMAX                        | EFACTS           | 9,315,470          | 0.951          |

ACR: American College of Rheumatology. 1KGP3: 1000 Genomes Project phase 3; WGS: whole genome sequencing; Number of Variants: number of variants after filtering by minor allele frequency  $\geq 0.5\%$ ; RSQR or INFO: the genotype imputation quality scores in IMPUTE2/4 and Minimac4  $\geq 0.3$ ; HWE: Hardy-Weinberg Equilibrium  $p$ -values  $> 1 \times 10^{-6}$ ;  $\lambda_{gc}$ : genomic inflation factor calculated in each data set by removing genetic variants within known SLE loci.



Supplementary Table 2 | Association results for the lead variants within the 113 genomic loci

| Region | CHR | Position    | SNP         | EA | NEA   | EA F  | OR    | SE    | P         | I <sup>2</sup> | P <sub>het</sub> | N       | Nearest gene |
|--------|-----|-------------|-------------|----|-------|-------|-------|-------|-----------|----------------|------------------|---------|--------------|
| 1      | 1   | 117,043,302 | rs9651076   | A  | G     | 0.431 | 1.117 | 0.015 | 3.26E-13  | 10.7           | 3.47E-01         | 208,370 | CD58         |
| 2      | 1   | 157,108,159 | rs116785379 | C  | G     | 0.107 | 1.211 | 0.024 | 6.68E-16  | 43.7           | 1.14E-01         | 208,370 | ETV3         |
| 3      | 1   | 161,569,829 | rs76107698  | C  | G     | 0.254 | 0.788 | 0.021 | 1.85E-30  | 0.0            | 7.62E-01         | 208,370 | FCGR2C       |
| 4      | 1   | 173,191,475 | rs2205960   | T  | G     | 0.265 | 1.368 | 0.016 | 3.16E-90  | 75.9           | 9.16E-04         | 208,370 | LOC100506023 |
| 5      | 1   | 183,532,437 | rs13306575  | A  | G     | 0.047 | 1.311 | 0.035 | 2.28E-14  | 43.7           | 1.14E-01         | 208,370 | NCF2         |
| 6      | 1   | 198,670,469 | rs4143303   | A  | G     | 0.140 | 0.880 | 0.022 | 3.70E-09  | 36.1           | 1.66E-01         | 208,370 | PTPRC        |
| 7      | 1   | 201,979,455 | rs3806357   | A  | G     | 0.251 | 1.106 | 0.017 | 4.25E-09  | 0.0            | 6.72E-01         | 208,370 | ELF3         |
| 8      | 1   | 206,642,720 | rs4844538   | A  | T     | 0.713 | 1.109 | 0.016 | 2.11E-10  | 0.0            | 8.45E-01         | 208,370 | IKBKE        |
| 9      | 2   | 7,573,079   | rs75362385  | T  | G     | 0.321 | 0.887 | 0.017 | 8.40E-13  | 68.3           | 7.52E-03         | 208,370 | LOC100506274 |
| 10     | 2   | 30,445,026  | rs7579944   | T  | C     | 0.620 | 0.876 | 0.014 | 1.02E-20  | 10.6           | 3.48E-01         | 208,370 | LBH          |
| 11     | 2   | 33,701,890  | rs13385731  | T  | C     | 0.860 | 1.287 | 0.021 | 1.29E-33  | 36.5           | 1.64E-01         | 208,370 | RASGRP3      |
| 12     | 2   | 65,580,221  | rs11126034  | T  | C     | 0.225 | 1.121 | 0.018 | 2.60E-10  | 30.5           | 2.07E-01         | 208,370 | SPRED2       |
| 13     | 2   | 74,216,515  | rs10207954  | A  | T     | 0.823 | 1.145 | 0.019 | 1.91E-12  | 70.3           | 4.81E-03         | 208,370 | TET3         |
| 14     | 2   | 111,877,174 | rs73954925  | C  | G     | 0.878 | 1.169 | 0.024 | 5.11E-11  | 56.4           | 4.27E-02         | 208,370 | BCL2L11      |
| 15     | 2   | 136,658,345 | rs218174    | A  | G     | 0.379 | 1.121 | 0.015 | 1.83E-13  | 0.0            | 9.96E-01         | 208,370 | DARS         |
| 16     | 2   | 163,082,395 | rs11679244  | A  | C     | 0.153 | 1.119 | 0.020 | 3.04E-08  | 0.0            | 6.32E-01         | 208,370 | FAP          |
| 17     | 2   | 191,943,742 | rs11889341  | T  | C     | 0.348 | 1.407 | 0.014 | 4.64E-123 | 91.7           | 1.07E-11         | 208,370 | STAT4        |
| 18     | 2   | 198,929,806 | rs7572733   | T  | C     | 0.260 | 1.143 | 0.017 | 1.25E-14  | 0.0            | 6.47E-01         | 208,370 | PLCL1        |
| 19     | 2   | 213,593,970 | rs7565158   | T  | G     | 0.450 | 1.096 | 0.015 | 2.88E-10  | 0.0            | 4.23E-01         | 208,370 | ERBB4        |
| 20     | 3   | 28,072,086  | rs438613    | T  | C     | 0.588 | 0.920 | 0.014 | 7.52E-09  | 69.4           | 5.87E-03         | 208,370 | CMC1         |
| 21     | 3   | 72,225,916  | rs7637844   | A  | C     | 0.871 | 0.877 | 0.023 | 1.28E-08  | 0.0            | 9.06E-01         | 208,370 | LINC00870    |
| 22     | 3   | 119,237,726 | rs144104218 | A  | AAAAC | 0.310 | 0.833 | 0.016 | 1.89E-30  | 45.0           | 1.05E-01         | 208,370 | TIMMDC1      |
| 23     | 3   | 169,497,585 | rs1317082   | A  | G     | 0.430 | 1.102 | 0.014 | 1.62E-11  | 58.5           | 3.40E-02         | 208,370 | MYNN         |
| 24     | 4   | 965,720     | rs13101828  | A  | G     | 0.610 | 0.910 | 0.015 | 7.78E-10  | 0.0            | 7.55E-01         | 208,370 | DGKQ         |
| 25     | 4   | 2,700,844   | rs231694    | T  | C     | 0.380 | 1.111 | 0.018 | 9.71E-09  | 23.7           | 2.69E-01         | 57,253  | FAM193A      |
| 26     | 4   | 40,307,587  | rs113284964 | G  | GCTTC | 0.371 | 1.134 | 0.015 | 1.35E-16  | 67.2           | 9.45E-03         | 208,370 | LINC02265    |
| 27     | 4   | 79,644,279  | rs6533951   | A  | G     | 0.350 | 1.111 | 0.016 | 1.25E-10  | 61.4           | 2.38E-02         | 208,370 | LINC01094    |
| 28     | 4   | 84,146,996  | rs6841907   | T  | C     | 0.729 | 0.906 | 0.016 | 1.10E-09  | 43.5           | 1.15E-01         | 208,370 | COQ2         |
| 29     | 4   | 87,944,252  | rs116940334 | T  | G     | 0.119 | 0.833 | 0.029 | 3.15E-10  | 0.0            | 4.37E-01         | 208,370 | AFF1         |
| 30     | 4   | 102,756,099 | rs4643809   | T  | C     | 0.305 | 0.846 | 0.016 | 3.53E-24  | 74.7           | 1.40E-03         | 208,370 | BANK1        |
| 31     | 4   | 109,061,618 | rs58107865  | C  | G     | 0.227 | 0.802 | 0.021 | 6.57E-25  | 1.1            | 4.09E-01         | 208,370 | LEF1         |
| 32     | 5   | 1,282,414   | rs7725218   | A  | G     | 0.391 | 1.132 | 0.015 | 2.47E-17  | 61.5           | 2.35E-02         | 208,370 | TERT         |
| 33     | 5   | 100,141,374 | rs2544920   | A  | T     | 0.226 | 1.122 | 0.019 | 8.74E-10  | 19.6           | 2.85E-01         | 208,370 | ST8SIA4      |

|    |    |             |             |    |              |       |       |       |           |      |          |         |              |
|----|----|-------------|-------------|----|--------------|-------|-------|-------|-----------|------|----------|---------|--------------|
| 34 | 5  | 131,120,338 | rs370449198 | A  | AC           | 0.922 | 0.721 | 0.060 | 4.41E-08  | 0.0  | 4.08E-01 | 187,562 | FNIP1        |
| 35 | 5  | 131,829,578 | rs2549002   | A  | C            | 0.682 | 0.905 | 0.016 | 2.40E-10  | 20.6 | 2.79E-01 | 208,370 | IRF1         |
| 36 | 5  | 133,429,192 | rs6874758   | C  | G            | 0.073 | 1.238 | 0.028 | 3.88E-14  | 0.0  | 5.56E-01 | 208,370 | TCF7         |
| 37 | 5  | 150,458,146 | rs10036748  | T  | C            | 0.760 | 1.194 | 0.017 | 5.98E-26  | 0.0  | 9.47E-01 | 208,370 | TNIP1        |
| 38 | 5  | 158,886,939 | rs2421184   | A  | G            | 0.497 | 1.106 | 0.015 | 6.43E-12  | 41.2 | 1.31E-01 | 208,370 | LINC01845    |
| 39 | 5  | 159,879,978 | rs2431697   | T  | C            | 0.833 | 1.241 | 0.019 | 1.39E-28  | 63.5 | 1.77E-02 | 208,370 | MIR3142      |
| 40 | 6  | 243,302     | rs9503037   | A  | G            | 0.693 | 0.881 | 0.016 | 1.36E-15  | 42.3 | 1.23E-01 | 208,370 | LOC285766    |
| 41 | 6  | 32,423,915  | rs9268807   | C  | G            | 0.208 | 1.604 | 0.021 | 4.90E-117 | 61.9 | 2.23E-02 | 204,105 | HLA          |
| 42 | 6  | 34,828,553  | rs6457796   | T  | C            | 0.864 | 0.808 | 0.022 | 2.68E-22  | 63.7 | 1.71E-02 | 208,370 | UHRF1BP1     |
| 43 | 6  | 36,715,031  | rs34868004  | CA | C            | 0.225 | 1.104 | 0.017 | 4.46E-09  | 40.7 | 1.34E-01 | 208,370 | CPNE5        |
| 44 | 6  | 91,002,494  | rs597325    | A  | G            | 0.548 | 0.906 | 0.015 | 4.60E-11  | 55.9 | 4.51E-02 | 208,370 | BACH2        |
| 45 | 6  | 106,568,034 | rs548234    | T  | C            | 0.705 | 0.819 | 0.015 | 5.54E-39  | 20.5 | 2.79E-01 | 208,370 | PRDM1        |
| 46 | 6  | 116,690,849 | rs9488914   | T  | C            | 0.920 | 0.862 | 0.026 | 1.14E-08  | 65.3 | 1.31E-02 | 208,370 | DSE          |
| 47 | 6  | 138,230,038 | rs148314165 | G  | GT           | 0.059 | 1.711 | 0.028 | 3.48E-84  | 72.7 | 2.61E-03 | 208,370 | TNFAIP3      |
| 48 | 6  | 154,570,651 | rs9322454   | A  | G            | 0.659 | 1.090 | 0.015 | 2.42E-08  | 0.0  | 4.30E-01 | 208,370 | IPCEF1       |
| 49 | 7  | 50,258,479  | rs4598207   | A  | T            | 0.705 | 1.333 | 0.018 | 4.12E-60  | 65.1 | 1.36E-02 | 208,370 | C7orf72      |
| 50 | 7  | 74,126,034  | rs117026326 | T  | C            | 0.175 | 2.137 | 0.021 | 2.20E-298 | 97.1 | 2.20E-28 | 201,819 | LOC101926943 |
| 51 | 7  | 128,576,086 | rs3757387   | T  | C            | 0.863 | 0.693 | 0.020 | 8.73E-79  | 68.3 | 7.58E-03 | 208,370 | IRF5         |
| 52 | 8  | 11,339,965  | rs2736332   | C  | G            | 0.734 | 1.360 | 0.017 | 1.57E-70  | 59.3 | 3.10E-02 | 208,370 | BLK          |
| 53 | 8  | 42,177,163  | rs2272736   | A  | G            | 0.105 | 0.819 | 0.030 | 6.37E-11  | 0.0  | 6.80E-01 | 208,370 | IKBKB        |
| 54 | 8  | 71,330,166  | rs142937720 | A  | AAGTG<br>GCC | 0.383 | 0.894 | 0.016 | 2.27E-12  | 67.9 | 8.12E-03 | 208,370 | NCOA2        |
| 55 | 8  | 72,894,959  | rs17374162  | A  | G            | 0.411 | 0.917 | 0.015 | 3.02E-09  | 35.7 | 1.69E-01 | 208,370 | MSC-AS1      |
| 56 | 8  | 129,425,593 | rs16902895  | A  | G            | 0.678 | 1.122 | 0.016 | 1.48E-13  | 0.0  | 8.01E-01 | 208,370 | LINC00824    |
| 57 | 9  | 4,984,530   | rs1887428   | C  | G            | 0.664 | 0.915 | 0.016 | 2.80E-08  | 59.6 | 3.00E-02 | 208,370 | JAK2         |
| 58 | 9  | 21,267,087  | rs7858766   | T  | C            | 0.538 | 1.139 | 0.016 | 2.25E-15  | 0.0  | 8.25E-01 | 208,370 | IFNA22P      |
| 59 | 10 | 5,910,746   | rs77448389  | A  | G            | 0.913 | 0.855 | 0.025 | 7.30E-10  | 0.0  | 5.84E-01 | 208,370 | ANKRD16      |
| 60 | 10 | 50,025,396  | rs7097397   | A  | G            | 0.651 | 0.810 | 0.016 | 2.23E-40  | 77.7 | 4.34E-04 | 208,370 | WDFY4        |
| 61 | 10 | 63,801,030  | rs7902146   | T  | C            | 0.691 | 0.900 | 0.015 | 3.34E-12  | 0.0  | 7.85E-01 | 208,370 | ARID5B       |
| 62 | 10 | 64,411,288  | rs10995261  | T  | C            | 0.240 | 0.909 | 0.017 | 2.57E-08  | 43.9 | 1.13E-01 | 208,370 | ZNF365       |
| 63 | 10 | 73,466,709  | rs10823829  | T  | C            | 0.718 | 0.910 | 0.016 | 1.05E-09  | 0.0  | 7.71E-01 | 208,370 | CDH23        |
| 64 | 10 | 105,677,911 | rs111447985 | A  | C            | 0.073 | 1.172 | 0.028 | 1.72E-08  | 0.0  | 5.26E-01 | 208,370 | STN1         |
| 65 | 10 | 112,664,114 | rs58164562  | T  | C            | 0.748 | 0.892 | 0.016 | 3.14E-12  | 33.3 | 1.86E-01 | 208,370 | BBIP1        |
| 66 | 11 | 4,113,200   | rs3750996   | A  | G            | 0.834 | 1.167 | 0.022 | 1.89E-12  | 0.0  | 5.22E-01 | 208,370 | STIM1        |
| 67 | 11 | 18,362,382  | rs77885959  | T  | G            | 0.978 | 1.694 | 0.062 | 3.16E-17  | 0.0  | 5.11E-01 | 204,433 | GTF2H1       |
| 68 | 11 | 35,093,029  | rs2785198   | A  | G            | 0.776 | 1.181 | 0.018 | 1.30E-20  | 0.0  | 8.62E-01 | 208,370 | LOC100507144 |
| 69 | 11 | 65,555,524  | rs10896045  | A  | G            | 0.551 | 1.168 | 0.015 | 6.59E-26  | 51.2 | 6.83E-02 | 208,370 | OVOL1        |

|     |    |             |             |     |       |       |       |       |          |      |          |         |              |
|-----|----|-------------|-------------|-----|-------|-------|-------|-------|----------|------|----------|---------|--------------|
| 70  | 11 | 68,816,370  | rs4930642   | A   | G     | 0.252 | 1.145 | 0.019 | 6.16E-13 | 22.1 | 2.68E-01 | 208,370 | TPCN2        |
| 71  | 11 | 72,640,480  | rs77971648  | T   | C     | 0.909 | 1.291 | 0.026 | 3.16E-23 | 38.4 | 1.50E-01 | 208,370 | FCHSD2       |
| 72  | 11 | 118,650,823 | rs377392985 | CAA | C     | 0.341 | 1.161 | 0.017 | 2.86E-19 | 36.8 | 1.61E-01 | 208,370 | DDX6         |
|     |    |             |             | AAA |       |       |       |       |          |      |          |         |              |
|     |    |             |             | AAA |       |       |       |       |          |      |          |         |              |
|     |    |             |             | A   |       |       |       |       |          |      |          |         |              |
| 73  | 11 | 128,305,871 | rs9736939   | A   | G     | 0.381 | 1.265 | 0.015 | 1.23E-58 | 71.7 | 3.36E-03 | 208,370 | ETS1         |
| 74  | 12 | 4,140,876   | rs2540119   | T   | C     | 0.544 | 1.086 | 0.015 | 3.51E-08 | 44.9 | 1.06E-01 | 208,370 | PARP11       |
| 75  | 12 | 12,874,462  | rs4251697   | A   | G     | 0.097 | 0.637 | 0.033 | 1.17E-43 | 79.1 | 2.20E-04 | 208,370 | CDKN1B       |
| 76  | 12 | 102,321,935 | rs4622329   | A   | G     | 0.561 | 1.119 | 0.014 | 4.00E-15 | 9.9  | 3.53E-01 | 208,370 | DRAM1        |
| 77  | 12 | 103,916,080 | rs6539078   | T   | C     | 0.591 | 0.894 | 0.015 | 9.49E-14 | 0.0  | 9.16E-01 | 208,370 | LOC105369945 |
| 78  | 12 | 111,933,545 | rs77465633  | A   | C     | 0.068 | 1.340 | 0.034 | 6.99E-18 | 4.9  | 3.85E-01 | 208,370 | ATXN2        |
| 79  | 12 | 121,368,518 | rs3999421   | A   | T     | 0.506 | 0.910 | 0.016 | 1.29E-09 | 47.3 | 9.13E-02 | 208,370 | XLOC_009911  |
| 80  | 12 | 129,296,103 | rs11059928  | A   | T     | 0.786 | 0.823 | 0.017 | 1.61E-30 | 55.7 | 4.62E-02 | 208,370 | SLC15A4      |
| 81  | 12 | 133,040,182 | rs200521476 | G   | GCATC | 0.812 | 0.875 | 0.023 | 5.66E-09 | 26.7 | 2.35E-01 | 208,370 | FBRSL1       |
|     |    |             |             |     | AC    |       |       |       |          |      |          |         |              |
| 82  | 13 | 41,575,391  | rs57141708  | A   | G     | 0.224 | 1.183 | 0.018 | 6.84E-22 | 72.1 | 3.01E-03 | 208,370 | ELF1         |
| 83  | 14 | 105,412,259 | rs2819426   | C   | G     | 0.331 | 0.824 | 0.017 | 2.51E-30 | 51.1 | 6.89E-02 | 208,370 | AHNAK2       |
| 84  | 15 | 38,846,678  | rs7170151   | T   | C     | 0.563 | 1.107 | 0.015 | 3.20E-12 | 0.0  | 4.33E-01 | 208,370 | RASGRP1      |
| 85  | 15 | 75,091,247  | rs11553760  | T   | C     | 0.235 | 1.111 | 0.017 | 7.32E-10 | 0.0  | 5.80E-01 | 208,370 | CSK          |
| 86  | 15 | 101,529,012 | rs35985016  | A   | G     | 0.930 | 0.843 | 0.030 | 1.95E-08 | 0.0  | 8.97E-01 | 204,433 | LRRK1        |
| 87  | 16 | 11,190,034  | rs34361002  | T   | TAA   | 0.624 | 1.140 | 0.015 | 1.24E-17 | 34.6 | 1.77E-01 | 208,370 | CLEC16A      |
| 88  | 16 | 23,871,457  | rs79401250  | T   | G     | 0.819 | 1.172 | 0.022 | 1.48E-12 | 0.0  | 6.11E-01 | 208,370 | PRKCB        |
| 89  | 16 | 30,813,454  | rs534645300 | A   | AT    | 0.930 | 0.814 | 0.035 | 2.68E-09 | 34.7 | 1.76E-01 | 208,370 | ZNF629       |
| 90  | 16 | 50,089,207  | rs11288784  | G   | GT    | 0.365 | 0.902 | 0.016 | 2.38E-10 | 0.0  | 6.64E-01 | 208,370 | HEATR3       |
| 91  | 16 | 57,390,478  | rs669763    | C   | G     | 0.521 | 1.123 | 0.015 | 2.89E-15 | 11.9 | 3.39E-01 | 208,370 | CCL22        |
| 92  | 16 | 68,554,755  | rs28410471  | A   | T     | 0.181 | 1.128 | 0.022 | 3.14E-08 | 24.5 | 2.51E-01 | 208,370 | ZFP90        |
| 93  | 16 | 79,745,672  | rs11376510  | G   | GT    | 0.737 | 0.898 | 0.017 | 2.23E-10 | 0.0  | 7.19E-01 | 208,370 | MAFTRR       |
| 94  | 16 | 86,019,271  | rs11117432  | A   | G     | 0.088 | 0.728 | 0.027 | 1.27E-32 | 58.4 | 3.44E-02 | 208,370 | IRF8         |
| 95  | 17 | 7,240,391   | rs61759532  | T   | C     | 0.076 | 1.235 | 0.032 | 2.79E-11 | 24.9 | 2.47E-01 | 208,370 | ACAP1        |
| 96  | 17 | 16,839,901  | rs35966917  | A   | G     | 0.423 | 0.914 | 0.015 | 4.66E-09 | 0.0  | 5.99E-01 | 208,370 | TNFRSF13B    |
| 97  | 17 | 47,468,020  | rs2671655   | T   | C     | 0.651 | 1.087 | 0.015 | 4.60E-08 | 0.0  | 7.56E-01 | 208,370 | LOC102724596 |
| 98  | 17 | 76,373,179  | rs113417153 | T   | C     | 0.193 | 0.893 | 0.020 | 1.90E-08 | 2.1  | 4.03E-01 | 208,370 | PGS1         |
| 99  | 18 | 67,543,688  | rs1788097   | T   | C     | 0.392 | 1.096 | 0.015 | 6.28E-10 | 17.9 | 2.98E-01 | 208,370 | CD226        |
| 100 | 18 | 77,386,912  | rs118075465 | A   | G     | 0.147 | 1.140 | 0.020 | 1.16E-10 | 0.0  | 5.43E-01 | 208,370 | LOC284241    |
| 101 | 19 | 948,532     | rs2238577   | T   | C     | 0.455 | 0.885 | 0.016 | 1.83E-14 | 60.8 | 2.57E-02 | 208,370 | ARID3A       |
| 102 | 19 | 6,697,088   | rs5826945   | A   | T     | 0.929 | 0.836 | 0.028 | 9.67E-11 | 50.0 | 7.54E-02 | 208,370 | C3           |

|     |    |             |            |                        |   |       |       |       |          |      |          |         |         |
|-----|----|-------------|------------|------------------------|---|-------|-------|-------|----------|------|----------|---------|---------|
| 103 | 19 | 10,469,919  | rs55882956 | A                      | G | 0.029 | 0.674 | 0.048 | 1.23E-16 | 21.6 | 2.71E-01 | 208,370 | TYK2    |
| 104 | 19 | 18,540,988  | rs11673604 | T                      | C | 0.759 | 1.144 | 0.019 | 4.21E-12 | 0.0  | 8.65E-01 | 208,370 | SSBP4   |
| 105 | 19 | 33,072,768  | rs12461589 | T                      | C | 0.248 | 0.898 | 0.017 | 5.00E-10 | 0.0  | 5.10E-01 | 208,370 | PDCD5   |
| 106 | 19 | 49,851,746  | rs33974425 | CCA<br>GCT<br>GCA<br>T | C | 0.702 | 1.120 | 0.016 | 4.40E-12 | 42.6 | 1.21E-01 | 208,370 | TEAD2   |
| 107 | 19 | 52,127,053  | rs4801882  | A                      | G | 0.532 | 0.882 | 0.014 | 1.86E-18 | 57.2 | 3.95E-02 | 208,370 | SIGLEC5 |
| 108 | 22 | 18,649,356  | rs4819670  | T                      | C | 0.210 | 1.151 | 0.022 | 5.53E-11 | 0.0  | 6.50E-01 | 208,370 | USP18   |
| 109 | 22 | 21,973,319  | rs4821116  | T                      | C | 0.380 | 1.240 | 0.015 | 8.86E-46 | 29.8 | 2.12E-01 | 208,370 | UBE2L3  |
| 110 | 22 | 39,739,187  | rs9611155  | T                      | C | 0.761 | 1.137 | 0.022 | 7.66E-09 | 0.0  | 4.96E-01 | 208,370 | SYNGR1  |
| 111 | X  | 12,839,790  | rs6641111  | C                      | G | 0.694 | 1.191 | 0.017 | 3.27E-25 | 0.0  | 6.45E-01 | 208,360 | PRPS2   |
| 112 | X  | 56,908,702  | rs5914012  | T                      | C | 0.353 | 1.104 | 0.017 | 6.65E-09 | 0.0  | 6.45E-01 | 208,360 | NBDY    |
| 113 | X  | 153,284,192 | rs1059702  | A                      | G | 0.783 | 1.356 | 0.020 | 5.89E-54 | 22.3 | 2.66E-01 | 208,360 | IRAK1   |

Region: region index ID; CHR: chromosome; Position: position in base pair in genome build 19; SNP: Single nucleotide polymorphism; EA: effective allele; NEA: non-effective allele; EAF: effective allele frequency; OR: odds ratio; SE: standard error for odds ratio;  $I^2$ : heterogeneity  $I^2$  statistics at scale of 0-100%;  $P_{het}$ : P-values for chi-squared test of heterogeneity; N: study sample size.

**Supplementary Table 3 | Comparison of minor allele frequencies between East Asians and Europeans for the lead variants and their strong LD proxies within the 46 novel loci**

| Region    | Lead Variants |                  |          |          |              |                    |                    | LD Proxy Variants |          |          |                    |                    | Statistical Power | Effect N      |
|-----------|---------------|------------------|----------|----------|--------------|--------------------|--------------------|-------------------|----------|----------|--------------------|--------------------|-------------------|---------------|
|           | CHR           | Position         | REF      | ALT      | OR           | MAF <sub>EAS</sub> | MAF <sub>NFE</sub> | Position          | REF      | ALT      | MAF <sub>EAS</sub> | MAF <sub>NFE</sub> |                   |               |
| 1         | 1             | 117043302        | A        | G        | 1.117        | 0.426              | 0.106              | 117032783         | G        | A        | 0.361              | 0.492              | 1.00              | 50,072        |
| 2         | 1             | 157108159        | G        | C        | 1.211        | 0.090              | 0.018              | 157114851         | T        | C        | 0.215              | 0.173              | 1.00              | 50,072        |
| 7         | 1             | 201979455        | G        | A        | 1.106        | 0.263              | 0.079              | 201977827         | G        | T        | 0.491              | 0.449              | 1.00              | 50,072        |
| 9         | 2             | 7573079          | G        | T        | 0.887        | 0.379              | 0.058              | 7572607           | T        | A        | 0.456              | 0.432              | 1.00              | 50,072        |
| 14        | 2             | 111877174        | C        | G        | 0.856        | 0.125              | 0.061              | 111862303         | T        | C        | 0.302              | 0.474              | 1.00              | 50,072        |
| 18        | 2             | 198929806        | C        | T        | 1.143        | 0.206              | 0.479              | 198898344         | A        | T        | 0.208              | 0.497              | 1.00              | 50,072        |
| 20        | 3             | 28072086         | T        | C        | 1.087        | 0.459              | 0.476              | 28075985          | T        | C        | 0.459              | 0.477              | 1.00              | 50,072        |
| 21        | 3             | 72225916         | A        | C        | 1.140        | 0.118              | 0.156              | 72214334          | C        | G        | 0.280              | 0.344              | 1.00              | 50,072        |
| 25        | 4             | 2700844          | T        | C        | 1.111        | 0.345              | 0.261              | 2700844           | T        | C        | 0.345              | 0.261              | 1.00              | 50,072        |
| 26        | 4             | 40307587         | G        | GCTTC    | 1.134        | 0.385              | 0.324              | 40279534          | G        | A        | 0.345              | 0.499              | 1.00              | 50,072        |
| 27        | 4             | 79644279         | A        | G        | 1.111        | 0.311              | 0.403              | 79637446          | G        | A        | 0.498              | 0.472              | 1.00              | 50,072        |
| 28        | 4             | 84146996         | T        | C        | 1.104        | 0.277              | 0.297              | 84146727          | T        | C        | 0.438              | 0.485              | 1.00              | 50,072        |
| <b>31</b> | <b>4</b>      | <b>109061618</b> | <b>G</b> | <b>C</b> | <b>0.802</b> | <b>0.249</b>       | <b>0.003</b>       | <b>109061618</b>  | <b>G</b> | <b>C</b> | <b>0.249</b>       | <b>0.003</b>       | <b>0.05</b>       | <b>50,072</b> |
| 34        | 5             | 131120338        | A        | AC       | 1.387        | 0.010              | 0.001              | 131231536         | C        | A        | 0.413              | 0.497              | 1.00              | 50,072        |
| 35        | 5             | 131829578        | C        | A        | 1.105        | 0.358              | 0.334              | 131905734         | C        | CT       | 0.149              | 0.493              | 1.00              | 50,072        |
| 40        | 6             | 243302           | A        | G        | 1.136        | 0.312              | 0.145              | 256959            | G        | A        | 0.433              | 0.495              | 1.00              | 50,072        |
| 43        | 6             | 36715031         | C        | CA       | 1.104        | 0.244              | 0.373              | 36699347          | G        | A        | 0.392              | 0.498              | 1.00              | 50,072        |
| 46        | 6             | 116690849        | C        | T        | 1.159        | 0.074              | 0.382              | 116598853         | A        | G        | 0.063              | 0.495              | 1.00              | 50,072        |
| 48        | 6             | 154570651        | G        | A        | 0.917        | 0.325              | 0.087              | 154583379         | T        | C        | 0.297              | 0.498              | 1.00              | 50,072        |
| 54        | 8             | 71330166         | AAGTGGCC | A        | 0.894        | 0.400              | 0.102              | 71344432          | T        | C        | 0.287              | 0.497              | 1.00              | 50,072        |
| 55        | 8             | 72894959         | G        | A        | 0.917        | 0.406              | 0.230              | 72920538          | T        | C        | 0.366              | 0.480              | 1.00              | 50,072        |
| 56        | 8             | 129425593        | A        | G        | 0.892        | 0.290              | 0.034              | 129445863         | G        | GAT      | 0.328              | 0.435              | 1.00              | 50,072        |
| 58        | 9             | 21267087         | T        | C        | 0.878        | 0.462              | 0.386              | 21235442          | C        | G        | 0.357              | 0.478              | 1.00              | 50,072        |
| 59        | 10            | 5910746          | A        | G        | 1.170        | 0.099              | 0.037              | 5914653           | A        | G        | 0.203              | 0.495              | 1.00              | 50,072        |
| 62        | 10            | 64411288         | C        | T        | 0.909        | 0.253              | 0.143              | 64431973          | CT       | C        | 0.430              | 0.433              | 1.00              | 50,072        |
| 63        | 10            | 73466709         | T        | C        | 1.099        | 0.276              | 0.029              | 73500155          | C        | T        | 0.453              | 0.245              | 1.00              | 50,072        |
| 64        | 10            | 105677911        | C        | A        | 1.172        | 0.068              | 0.002              | 105690267         | G        | A        | 0.209              | 0.410              | 1.00              | 50,072        |
| 65        | 10            | 112664114        | T        | C        | 1.121        | 0.230              | 0.058              | 112607783         | TAAGA    | T        | 0.412              | 0.290              | 1.00              | 50,072        |
| 66        | 11            | 4113200          | A        | G        | 0.857        | 0.217              | 0.000              | 4032665           | A        | G        | 0.372              | 0.496              | 1.00              | 50,072        |
| <b>67</b> | <b>11</b>     | <b>18362382</b>  | <b>T</b> | <b>G</b> | <b>0.590</b> | <b>0.017</b>       | <b>0.000</b>       | <b>18292586</b>   | <b>C</b> | <b>G</b> | <b>0.016</b>       | <b>0.000</b>       | <b>0.03</b>       | <b>50,072</b> |
| 74        | 12            | 4140876          | T        | C        | 0.921        | 0.466              | 0.223              | 4221407           | C        | T        | 0.081              | 0.480              | 1.00              | 50,072        |
| 77        | 12            | 103916080        | T        | C        | 1.119        | 0.394              | 0.176              | 103809931         | C        | G        | 0.324              | 0.488              | 1.00              | 50,072        |
| 79        | 12            | 121368518        | A        | T        | 1.099        | 0.476              | 0.408              | 121344515         | T        | C        | 0.473              | 0.496              | 1.00              | 50,072        |

|     |    |           |            |    |       |       |       |           |   |   |       |       |      |        |
|-----|----|-----------|------------|----|-------|-------|-------|-----------|---|---|-------|-------|------|--------|
| 81  | 12 | 133040182 | GCATCAC    | G  | 1.143 | 0.091 | 0.257 | 133063768 | G | A | 0.130 | 0.493 | 1.00 | 50,072 |
| 86  | 15 | 101529012 | A          | G  | 1.186 | 0.034 | 0.001 | 101506285 | T | C | 0.014 | 0.038 | 1.00 | 50,072 |
| 90  | 16 | 50089207  | GT         | G  | 0.902 | 0.374 | 0.198 | 50273547  | C | T | 0.321 | 0.482 | 1.00 | 50,072 |
| 93  | 16 | 79745672  | G          | GT | 1.113 | 0.274 | 0.322 | 79738917  | C | T | 0.328 | 0.497 | 1.00 | 50,072 |
| 95  | 17 | 7240391   | C          | T  | 1.235 | 0.098 | 0.227 | 7221385   | G | A | 0.056 | 0.431 | 1.00 | 50,072 |
| 97  | 17 | 47468020  | C          | T  | 0.920 | 0.303 | 0.060 | 47372764  | C | T | 0.226 | 0.344 | 1.00 | 50,072 |
| 98  | 17 | 76373179  | C          | T  | 0.893 | 0.207 | 0.062 | 76383671  | C | T | 0.425 | 0.491 | 1.00 | 50,072 |
| 100 | 18 | 77386912  | G          | A  | 1.140 | 0.155 | 0.034 | 77381300  | C | T | 0.156 | 0.493 | 1.00 | 50,072 |
| 101 | 19 | 948532    | C          | T  | 0.885 | 0.497 | 0.144 | 930874    | C | T | 0.440 | 0.411 | 1.00 | 50,072 |
| 102 | 19 | 6697088   | A          | T  | 1.196 | 0.434 | 0.477 | 6721640   | A | C | 0.180 | 0.499 | 1.00 | 50,072 |
| 105 | 19 | 33072768  | C          | T  | 0.898 | 0.237 | 0.002 | 33040205  | T | A | 0.448 | 0.493 | 1.00 | 50,072 |
| 106 | 19 | 49851746  | CCAGCTGCAT | C  | 0.893 | 0.330 | 0.261 | 49755490  | T | C | 0.357 | 0.499 | 1.00 | 50,072 |
| 108 | 22 | 18649356  | T          | C  | 1.15  | 0.16  | 0.36  | 18634776  | C | G | 0.30  | 0.40  | 1.00 | 50,072 |

Lead Variant: the variant with lowest association p-value within each of the 46 novel SLE loci; LD Proxy Variant: the variant that has highest minor allele frequency in gnomAD v3 non-Finnish Europeans among all variants having strong linkage disequilibrium  $r^2 \geq 0.2$  with lead variant in either East Asians or Europeans; Region: index ID for genomic regions; CHR: chromosome; Position: position base pair in genome build 19; REF: reference allele; ALT: alternative allele; MAF<sub>EAS</sub>: minor allele frequency in East Asians from gnomAD v3 database; MAF<sub>NEE</sub>: minor allele frequency in non-Finnish Europeans from gnomAD v3 database; Statistical Power: statistical power in non-Finnish Europeans for LD proxy variant using the same effect size and study sample size as current study; Effect N: effective sample size used for estimating statistical power in Europeans. The two loci in bold denote the ones in which both the lead variants and the LD proxy variants have at least ten fold higher minor allele frequencies in East Asians and whose statistical power is below 10% in European of similar sample size.

Supplementary Table 4 | LD between newly-identified and known missense variants at the same genes

| Gene   | Reported   | Population      | Current    | MAF  |      | Pairwise LD $r^2$                |                                    |
|--------|------------|-----------------|------------|------|------|----------------------------------|------------------------------------|
|        |            |                 |            | EAS  | EUR  | EAS                              | EUR                                |
| TYK2   | rs2304256  | EUR             | rs55882956 | 0.03 | 0    | 0.028                            | 0.000                              |
| NCF2   | rs17849502 | EUR/AFR         | rs13306575 | 0.04 | 0    | rs17849502 is monomorphic in EAS | rs13306575 is monomorphic in EUR   |
|        | rs35937854 | EUR/AFR         | rs13306575 | 0.04 | 0    | rs35937854 is monomorphic in EAS | rs13306575 is monomorphic in EUR   |
|        | rs17849501 | EUR/AFR         | rs13306575 | 0.04 | 0    | rs17849501 is monomorphic in EAS | rs13306575 is monomorphic in EUR   |
|        | rs2274064  | EUR/AFR/HIS/EAS | rs13306575 | 0.35 | 0.47 | 0.024                            | rs13306575 is monomorphic in EUR   |
|        | rs17849502 | EUR/AFR         | rs66977652 | 0.34 | 0.47 | rs17849502 is monomorphic in EAS | rs66977652 is not available in EUR |
|        | rs35937854 | EUR/AFR         | rs66977652 | 0.34 | 0.47 | rs35937854 is monomorphic in EAS | rs66977652 is not available in EUR |
|        | rs17849501 | EUR/AFR         | rs66977652 | 0.34 | 0.47 | rs17849501 is monomorphic in EAS | rs66977652 is not available in EUR |
|        | rs2274064  | EUR/AFR/HIS/EAS | rs66977652 | 0.35 | 0.47 | 0.894                            | 0.992                              |
| OAS1   | rs1051042  | EAS             | rs1131476  | 0.22 | 0.34 | 1.000                            | 1.000                              |
| AHNAK2 | rs4465542  | EAS             | rs2819426  | 0.28 | 0.23 | 0.779                            | 0.310                              |
| IRAK1  | rs1059702  | EAS             | rs1059702  | 0.2  | 0.14 | 1.000                            | 1.000                              |
| WDFY4  | rs7097397  | EAS             | rs7072606  | 0.19 | 0.08 | 0.021                            | 0.034                              |
|        | rs7097397  | EAS             | rs7097397  | 0.33 | 0.39 | 1.000                            | 1.000                              |

Reported: the missense variants reported previously; Population: population (Europeans: EUR; Africans: AFR; East Asians: EAS; Hispanic: HIS) in which the missense variant was originally reported, EUR: European; Current: the missense variants identified in current meta-analysis; MAF: minor allele frequency for the newly identified missense variant in East Asians (EAS) and Europeans (EUR) of 1000 Genomes Project; Pairwise LD  $r^2$ : the LD  $r^2$  between the newly-identified missense variants and previously known missense variant within the same gene in 1000 Genomes Project East Asian (EAS) or European (EUR) samples.

Supplementary Table 5 | Association results for the index variants of the 233 distinct signals within the 113 genomic loci

| Region | Novel | Lead rsID   | rsID        | CHR | Position    | EA | NEA       | EAF   | Unconditional |       |           | Conditional |       |          | N       |
|--------|-------|-------------|-------------|-----|-------------|----|-----------|-------|---------------|-------|-----------|-------------|-------|----------|---------|
|        |       |             |             |     |             |    |           |       | OR            | SE    | P         | OR          | SE    | P        |         |
| 1      | NOVEL | rs9651076   | rs9651076   | 1   | 117,043,302 | A  | G         | 0.431 | 1.117         | 0.015 | 3.26E-13  | 1.117       | 0.015 | 3.63E-13 | 208,370 |
| 2      | NOVEL | rs116785379 | rs116785379 | 1   | 157,108,159 | C  | G         | 0.107 | 1.211         | 0.024 | 6.68E-16  | 1.204       | 0.024 | 4.76E-15 | 208,370 |
| 2      | NOVEL | rs116785379 | rs112806509 | 1   | 157,502,015 | A  | AT        | 0.097 | 0.812         | 0.026 | 1.76E-15  | 0.785       | 0.027 | 1.51E-19 | 208,370 |
| 2      | NOVEL | rs116785379 | rs2317230   | 1   | 157,674,997 | T  | G         | 0.392 | 1.061         | 0.015 | 9.86E-05  | 1.102       | 0.016 | 5.15E-10 | 208,370 |
| 3      | KNOWN | rs76107698  | rs12120358  | 1   | 161,444,369 | A  | T         | 0.893 | 0.842         | 0.026 | 2.96E-11  | 0.851       | 0.026 | 4.89E-10 | 208,370 |
| 3      | KNOWN | rs76107698  | rs111994823 | 1   | 161,470,274 | T  | C         | 0.964 | 1.409         | 0.052 | 3.41E-11  | 1.427       | 0.052 | 6.42E-12 | 208,370 |
| 3      | KNOWN | rs76107698  | rs76107698  | 1   | 161,569,829 | C  | G         | 0.254 | 0.788         | 0.021 | 1.85E-30  | 0.799       | 0.021 | 1.39E-26 | 208,370 |
| 3      | KNOWN | rs76107698  | rs75773410  | 1   | 161,625,798 | A  | G         | 0.923 | 0.774         | 0.033 | 3.84E-15  | 0.802       | 0.033 | 1.81E-11 | 208,370 |
| 4      | KNOWN | rs2205960   | rs2205960   | 1   | 173,191,475 | T  | G         | 0.265 | 1.368         | 0.016 | 3.16E-90  | 1.361       | 0.017 | 7.45E-71 | 208,370 |
| 4      | KNOWN | rs2205960   | rs117278480 | 1   | 173,210,789 | A  | G         | 0.913 | 0.649         | 0.028 | 2.23E-52  | 0.802       | 0.030 | 4.43E-13 | 208,370 |
| 4      | KNOWN | rs2205960   | rs844646    | 1   | 173,216,373 | A  | G         | 0.824 | 1.000         | 0.019 | 9.94E-01  | 0.864       | 0.020 | 7.90E-14 | 208,370 |
| 4      | KNOWN | rs2205960   | rs2039982   | 1   | 173,359,187 | T  | C         | 0.656 | 1.242         | 0.017 | 1.85E-37  | 1.253       | 0.017 | 2.80E-39 | 208,370 |
| 5      | KNOWN | rs13306575  | rs13306575  | 1   | 183,532,437 | A  | G         | 0.047 | 1.311         | 0.035 | 2.28E-14  | 1.357       | 0.036 | 1.48E-17 | 208,370 |
| 5      | KNOWN | rs13306575  | rs66977652  | 1   | 183,540,215 | T  | TA        | 0.623 | 0.907         | 0.015 | 7.76E-11  | 0.892       | 0.015 | 5.01E-14 | 208,370 |
| 6      | KNOWN | rs4143303   | rs4143303   | 1   | 198,670,469 | A  | G         | 0.140 | 0.880         | 0.022 | 3.70E-09  | 0.880       | 0.022 | 2.79E-09 | 208,370 |
| 7      | NOVEL | rs3806357   | rs3806357   | 1   | 201,979,455 | A  | G         | 0.251 | 1.106         | 0.017 | 4.25E-09  | 1.106       | 0.017 | 4.40E-09 | 208,370 |
| 8      | KNOWN | rs4844538   | rs4844538   | 1   | 206,642,720 | A  | T         | 0.713 | 1.109         | 0.016 | 2.11E-10  | 1.108       | 0.016 | 3.09E-10 | 208,370 |
| 9      | NOVEL | rs75362385  | rs75362385  | 2   | 7,573,079   | T  | G         | 0.321 | 0.887         | 0.017 | 8.40E-13  | 0.887       | 0.017 | 8.08E-13 | 208,370 |
| 10     | KNOWN | rs7579944   | rs7579944   | 2   | 30,445,026  | T  | C         | 0.620 | 0.876         | 0.014 | 1.02E-20  | 0.877       | 0.014 | 2.29E-20 | 208,370 |
| 11     | KNOWN | rs13385731  | rs13385731  | 2   | 33,701,890  | T  | C         | 0.860 | 1.287         | 0.021 | 1.29E-33  | 1.285       | 0.021 | 3.79E-33 | 208,370 |
| 12     | KNOWN | rs11126034  | rs11684155  | 2   | 65,581,300  | T  | C         | 0.775 | 0.892         | 0.018 | 2.61E-10  | 0.893       | 0.018 | 3.24E-10 | 208,370 |
| 13     | KNOWN | rs10207954  | rs10207954  | 2   | 74,216,515  | A  | T         | 0.823 | 1.145         | 0.019 | 1.91E-12  | 1.144       | 0.019 | 2.56E-12 | 208,370 |
| 14     | NOVEL | rs73954925  | rs73954925  | 2   | 111,877,174 | C  | G         | 0.878 | 1.169         | 0.024 | 5.11E-11  | 1.169       | 0.024 | 4.79E-11 | 208,370 |
| 15     | KNOWN | rs218174    | rs218174    | 2   | 136,658,345 | A  | G         | 0.379 | 1.121         | 0.015 | 1.83E-13  | 1.121       | 0.016 | 1.92E-13 | 208,370 |
| 16     | KNOWN | rs11679244  | rs11679244  | 2   | 163,082,395 | A  | C         | 0.153 | 1.119         | 0.020 | 3.04E-08  | 1.119       | 0.020 | 3.22E-08 | 208,370 |
| 17     | KNOWN | rs11889341  | rs11889341  | 2   | 191,943,742 | T  | C         | 0.348 | 1.407         | 0.014 | 4.64E-123 | 1.367       | 0.015 | 2.65E-99 | 208,370 |
| 17     | KNOWN | rs11889341  | rs71403211  | 2   | 191,948,986 | T  | TA        | 0.884 | 1.462         | 0.026 | 3.16E-49  | 1.323       | 0.026 | 1.81E-26 | 208,370 |
| 18     | NOVEL | rs7572733   | rs11684176  | 2   | 198,954,774 | T  | C         | 0.250 | 1.146         | 0.018 | 1.50E-14  | 1.148       | 0.018 | 1.02E-14 | 208,370 |
| 19     | KNOWN | rs7565158   | rs7565158   | 2   | 213,593,970 | T  | G         | 0.450 | 1.096         | 0.015 | 2.88E-10  | 1.098       | 0.015 | 1.13E-10 | 208,370 |
| 19     | KNOWN | rs7565158   | rs2371790   | 2   | 213,884,666 | A  | G         | 0.224 | 1.107         | 0.018 | 6.48E-09  | 1.110       | 0.018 | 2.41E-09 | 208,370 |
| 20     | NOVEL | rs438613    | rs438613    | 3   | 28,072,086  | T  | C         | 0.588 | 0.920         | 0.014 | 7.52E-09  | 0.920       | 0.014 | 6.99E-09 | 208,370 |
| 21     | NOVEL | rs7637844   | rs7637844   | 3   | 72,225,916  | A  | C         | 0.871 | 0.877         | 0.023 | 1.28E-08  | 0.877       | 0.023 | 1.25E-08 | 208,370 |
| 22     | KNOWN | rs144104218 | rs144104218 | 3   | 119,237,726 | A  | AAAA<br>C | 0.310 | 0.833         | 0.016 | 1.89E-30  | 0.833       | 0.016 | 1.32E-30 | 208,370 |
| 23     | KNOWN | rs1317082   | rs1317082   | 3   | 169,497,585 | A  | G         | 0.430 | 1.102         | 0.014 | 1.62E-11  | 1.102       | 0.014 | 1.71E-11 | 208,370 |
| 24     | KNOWN | rs13101828  | rs13101828  | 4   | 965,720     | A  | G         | 0.610 | 0.910         | 0.015 | 7.78E-10  | 0.909       | 0.015 | 5.63E-10 | 208,370 |
| 25     | NOVEL | rs231694    | rs231694    | 4   | 2,700,844   | T  | C         | 0.380 | 1.111         | 0.018 | 9.71E-09  | 1.112       | 0.018 | 8.02E-09 | 57,253  |
| 26     | NOVEL | rs113284964 | rs113284964 | 4   | 40,307,587  | G  | GCTTC     | 0.371 | 1.134         | 0.015 | 1.35E-16  | 1.134       | 0.015 | 1.51E-16 | 208,370 |
| 27     | NOVEL | rs6533951   | rs6533951   | 4   | 79,644,279  | A  | G         | 0.350 | 1.111         | 0.016 | 1.25E-10  | 1.110       | 0.016 | 1.71E-10 | 208,370 |



|    |       |             |             |   |             |   |      |       |       |       |          |        |       |           |         |
|----|-------|-------------|-------------|---|-------------|---|------|-------|-------|-------|----------|--------|-------|-----------|---------|
| 27 | NOVEL | rs6533951   | rs2867700   | 4 | 81,084,349  | A | G    | 0.833 | 1.113 | 0.020 | 5.83E-08 | 1.115  | 0.020 | 3.70E-08  | 208,370 |
| 28 | NOVEL | rs6841907   | rs11099582  | 4 | 84,142,744  | A | G    | 0.266 | 1.103 | 0.016 | 1.40E-09 | 1.103  | 0.016 | 1.10E-09  | 208,370 |
| 29 | KNOWN | rs116940334 | rs144261754 | 4 | 87,904,688  | T | TAAA | 0.290 | 0.899 | 0.017 | 3.45E-10 | 0.897  | 0.017 | 1.54E-10  | 208,370 |
|    |       |             |             |   |             |   | A    |       |       |       |          |        |       |           |         |
| 30 | KNOWN | rs4643809   | rs4643809   | 4 | 102,756,099 | T | C    | 0.305 | 0.846 | 0.016 | 3.53E-24 | 0.844  | 0.016 | 4.69E-25  | 208,370 |
| 31 | NOVEL | rs58107865  | rs956237    | 4 | 109,046,960 | A | G    | 0.320 | 1.107 | 0.015 | 4.47E-11 | 1.151  | 0.017 | 4.47E-17  | 208,370 |
| 31 | NOVEL | rs58107865  | rs57634688  | 4 | 109,111,805 | T | C    | 0.366 | 1.044 | 0.016 | 6.55E-03 | 1.109  | 0.017 | 1.50E-09  | 208,370 |
| 32 | KNOWN | rs7725218   | rs7725218   | 5 | 1,282,414   | A | G    | 0.391 | 1.132 | 0.015 | 2.47E-17 | 1.132  | 0.015 | 2.57E-17  | 208,370 |
| 33 | KNOWN | rs2544920   | rs2544920   | 5 | 100,141,374 | A | T    | 0.226 | 1.122 | 0.019 | 8.74E-10 | 1.122  | 0.019 | 8.66E-10  | 208,370 |
| 34 | NOVEL | rs370449198 | rs370449198 | 5 | 131,120,338 | A | AC   | 0.922 | 0.721 | 0.060 | 4.41E-08 | -      | -     | -         | 187,562 |
| 35 | NOVEL | rs2549002   | rs2549002   | 5 | 131,829,578 | A | C    | 0.682 | 0.905 | 0.016 | 2.40E-10 | 0.908  | 0.016 | 8.61E-10  | 208,370 |
| 36 | KNOWN | rs6874758   | rs115267018 | 5 | 133,421,109 | C | G    | 0.134 | 0.850 | 0.025 | 9.08E-11 | 0.865  | 0.025 | 8.29E-09  | 208,370 |
| 36 | KNOWN | rs6874758   | rs6874758   | 5 | 133,429,192 | C | G    | 0.073 | 1.238 | 0.028 | 3.88E-14 | 1.217  | 0.028 | 4.22E-12  | 208,370 |
| 36 | KNOWN | rs6874758   | rs138305363 | 5 | 133,714,873 | A | G    | 0.980 | 0.622 | 0.087 | 4.07E-08 | 0.623  | 0.087 | 4.49E-08  | 183,009 |
| 37 | KNOWN | rs10036748  | rs10036748  | 5 | 150,458,146 | T | C    | 0.760 | 1.194 | 0.017 | 5.98E-26 | 1.194  | 0.017 | 6.08E-26  | 208,370 |
| 38 | KNOWN | rs2421184   | rs2421184   | 5 | 158,886,939 | A | G    | 0.497 | 1.106 | 0.015 | 6.43E-12 | 1.105  | 0.015 | 8.42E-12  | 208,370 |
| 39 | KNOWN | rs2431697   | rs2431697   | 5 | 159,879,978 | T | C    | 0.833 | 1.241 | 0.019 | 1.39E-28 | 1.239  | 0.020 | 3.76E-28  | 208,370 |
| 40 | NOVEL | rs9503037   | rs9503037   | 6 | 243,302     | A | G    | 0.693 | 0.881 | 0.016 | 1.36E-15 | 0.881  | 0.016 | 1.32E-15  | 208,370 |
| 41 | KNOWN | rs9268807   | rs79774308  | 6 | 25,411,022  | A | G    | 0.960 | 1.452 | 0.060 | 5.76E-10 | 1.630  | 0.061 | 7.51E-16  | 205,565 |
| 41 | KNOWN | rs9268807   | rs9295676   | 6 | 25,928,376  | T | G    | 0.598 | 1.105 | 0.015 | 7.94E-11 | 1.097  | 0.016 | 6.67E-09  | 208,370 |
| 41 | KNOWN | rs9268807   | rs77285596  | 6 | 28,410,143  | T | G    | 0.917 | 1.362 | 0.034 | 2.20E-19 | 1.646  | 0.042 | 3.71E-32  | 208,370 |
| 41 | KNOWN | rs9268807   | rs1033568   | 6 | 29,257,967  | A | G    | 0.429 | 1.081 | 0.016 | 1.34E-06 | 1.106  | 0.017 | 1.36E-09  | 208,370 |
| 41 | KNOWN | rs9268807   | rs111508444 | 6 | 29,603,512  | A | G    | 0.945 | 1.522 | 0.047 | 2.41E-19 | 1.559  | 0.052 | 9.30E-18  | 208,370 |
| 41 | KNOWN | rs9268807   | rs75460055  | 6 | 29,889,250  | T | C    | 0.039 | 1.020 | 0.064 | 7.61E-01 | 0.470  | 0.087 | 4.92E-18  | 60,058  |
| 41 | KNOWN | rs9268807   | rs534723171 | 6 | 29,909,823  | T | G    | 0.061 | 0.996 | 0.057 | 9.41E-01 | 2.735  | 0.088 | 1.55E-30  | 199,552 |
| 41 | KNOWN | rs9268807   | rs2523968   | 6 | 29,939,148  | A | T    | 0.429 | 1.058 | 0.017 | 8.11E-04 | 1.132  | 0.018 | 4.23E-12  | 204,105 |
| 41 | KNOWN | rs9268807   | rs1264585   | 6 | 30,285,650  | A | T    | 0.233 | 1.074 | 0.021 | 7.13E-04 | 1.206  | 0.025 | 1.17E-13  | 204,105 |
| 41 | KNOWN | rs9268807   | rs3131933   | 6 | 30,933,864  | T | C    | 0.808 | 0.922 | 0.019 | 2.07E-05 | 0.891  | 0.020 | 6.65E-09  | 204,105 |
| 41 | KNOWN | rs9268807   | rs566731348 | 6 | 30,994,889  | A | G    | 0.951 | 1.889 | 0.092 | 3.65E-12 | 1.779  | 0.092 | 3.63E-10  | 43,187  |
| 41 | KNOWN | rs9268807   | rs75881311  | 6 | 31,102,273  | A | T    | 0.082 | 1.064 | 0.032 | 5.14E-02 | 1.279  | 0.034 | 2.54E-13  | 57,253  |
| 41 | KNOWN | rs9268807   | rs112262437 | 6 | 31,247,406  | C | G    | 0.994 | 1.204 | 0.130 | 1.53E-01 | 6.006  | 0.165 | 1.90E-27  | 18,003  |
| 41 | KNOWN | rs9268807   | rs111743557 | 6 | 31,299,497  | T | TTG  | 0.888 | 0.869 | 0.034 | 3.79E-05 | 0.729  | 0.036 | 2.10E-18  | 204,105 |
| 41 | KNOWN | rs9268807   | rs2523483   | 6 | 31,353,792  | T | G    | 0.939 | 1.214 | 0.046 | 2.11E-05 | 4.665  | 0.067 | 2.83E-117 | 204,105 |
| 41 | KNOWN | rs9268807   | rs28359827  | 6 | 31,360,643  | A | AT   | 0.077 | 1.024 | 0.038 | 5.34E-01 | 2.916  | 0.060 | 1.94E-71  | 60,058  |
| 41 | KNOWN | rs9268807   | rs2516465   | 6 | 31,414,906  | T | G    | 0.095 | 1.105 | 0.040 | 1.30E-02 | 2.113  | 0.051 | 5.93E-48  | 190,039 |
| 41 | KNOWN | rs9268807   | rs4458721   | 6 | 31,415,852  | T | C    | 0.249 | 1.181 | 0.026 | 2.73E-10 | 1.226  | 0.029 | 2.66E-12  | 48,606  |
| 41 | KNOWN | rs9268807   | rs2263318   | 6 | 31,432,006  | A | G    | 0.059 | 0.597 | 0.057 | 1.05E-19 | 0.315  | 0.081 | 4.29E-46  | 187,234 |
| 41 | KNOWN | rs9268807   | rs2256974   | 6 | 31,555,392  | A | C    | 0.375 | 0.842 | 0.017 | 2.23E-25 | 0.850  | 0.019 | 2.36E-18  | 204,105 |
| 41 | KNOWN | rs9268807   | rs542914466 | 6 | 31,581,037  | A | G    | 0.009 | 1.099 | 0.165 | 5.68E-01 | 18.321 | 0.227 | 1.54E-37  | 39,250  |
| 41 | KNOWN | rs9268807   | rs3115674   | 6 | 31,799,076  | T | G    | 0.983 | 0.652 | 0.075 | 1.43E-08 | 0.639  | 0.076 | 4.52E-09  | 204,105 |
| 41 | KNOWN | rs9268807   | rs117217736 | 6 | 31,808,728  | T | C    | 0.991 | 0.479 | 0.103 | 1.06E-12 | 0.164  | 0.138 | 3.36E-39  | 183,297 |
| 41 | KNOWN | rs9268807   | rs554383943 | 6 | 31,975,258  | C | G    | 0.986 | 3.634 | 0.176 | 2.47E-13 | 12.668 | 0.207 | 1.24E-34  | 158,113 |
| 41 | KNOWN | rs9268807   | rs200283861 | 6 | 31,994,723  | A | G    | 0.277 | 1.203 | 0.019 | 2.51E-23 | 1.154  | 0.020 | 1.36E-12  | 204,105 |
| 41 | KNOWN | rs9268807   | rs113720465 | 6 | 32,005,355  | A | G    | 0.052 | 0.849 | 0.053 | 2.00E-03 | 0.447  | 0.071 | 5.71E-30  | 201,300 |

|    |       |           |                                   |   |            |                  |                               |       |       |       |           |       |       |           |         |
|----|-------|-----------|-----------------------------------|---|------------|------------------|-------------------------------|-------|-------|-------|-----------|-------|-------|-----------|---------|
| 41 | KNOWN | rs9268807 | rs7774739                         | 6 | 32,009,301 | A                | G                             | 0.993 | 0.848 | 0.108 | 1.24E-01  | 0.483 | 0.113 | 1.33E-10  | 60,058  |
| 41 | KNOWN | rs9268807 | rs146280229                       | 6 | 32,017,607 | C                | G                             | 0.007 | 1.448 | 0.086 | 1.59E-05  | 1.815 | 0.088 | 9.56E-12  | 201,300 |
| 41 | KNOWN | rs9268807 | rs565981183                       | 6 | 32,111,023 | CA               | C                             | 0.876 | 1.192 | 0.026 | 1.23E-11  | 1.261 | 0.028 | 3.59E-16  | 204,105 |
| 41 | KNOWN | rs9268807 | rs9281714                         | 6 | 32,254,259 | T                | TTTTA<br>TATAT<br>ATATA<br>TA | 0.974 | 1.419 | 0.073 | 1.82E-06  | 1.658 | 0.074 | 1.08E-11  | 57,253  |
| 41 | KNOWN | rs9268807 | rs145396511                       | 6 | 32,299,458 | T                | C                             | 0.989 | 1.251 | 0.076 | 3.41E-03  | 1.574 | 0.077 | 4.63E-09  | 204,105 |
| 41 | KNOWN | rs9268807 | rs368529276                       | 6 | 32,321,473 | A                | G                             | 0.961 | 2.522 | 0.103 | 3.52E-19  | 5.109 | 0.127 | 9.70E-38  | 183,297 |
| 41 | KNOWN | rs9268807 | rs146003878                       | 6 | 32,357,239 | A                | T                             | 0.016 | 0.925 | 0.070 | 2.63E-01  | 1.678 | 0.079 | 4.54E-11  | 204,105 |
| 41 | KNOWN | rs9268807 | rs9268486                         | 6 | 32,368,560 | T                | C                             | 0.248 | 0.936 | 0.022 | 3.03E-03  | 1.384 | 0.030 | 7.90E-27  | 57,253  |
| 41 | KNOWN | rs9268807 | rs574027387                       | 6 | 32,379,313 | A                | ACAC<br>AC                    | 0.673 | 0.973 | 0.028 | 3.20E-01  | 1.376 | 0.032 | 3.25E-23  | 25,361  |
| 41 | KNOWN | rs9268807 | rs9268807                         | 6 | 32,423,915 | C                | G                             | 0.208 | 1.604 | 0.021 | 4.90E-117 | 1.667 | 0.028 | 9.79E-73  | 204,105 |
| 41 | KNOWN | rs9268807 | rs9268989                         | 6 | 32,435,549 | A                | G                             | 0.378 | 0.856 | 0.021 | 6.49E-14  | 0.549 | 0.037 | 1.83E-59  | 60,058  |
| 41 | KNOWN | rs9268807 | rs9269029                         | 6 | 32,437,544 | A                | C                             | 0.176 | 0.866 | 0.026 | 2.33E-08  | 5.664 | 0.057 | 1.82E-205 | 60,058  |
| 41 | KNOWN | rs9268807 | rs34452045                        | 6 | 32,442,118 | G                | GC                            | 0.145 | 0.694 | 0.031 | 3.39E-31  | 0.549 | 0.039 | 1.97E-54  | 204,105 |
| 41 | KNOWN | rs9268807 | 6:32449301:T<br><:INS:ME:ALU<br>> | 6 | 32,449,301 | <INS:M<br>E:ALU> | T                             | 0.128 | 0.616 | 0.038 | 7.84E-37  | 0.595 | 0.043 | 8.46E-34  | 62,672  |
| 41 | KNOWN | rs9268807 | rs9269207                         | 6 | 32,449,896 | T                | C                             | 0.622 | 0.754 | 0.019 | 6.00E-48  | 0.376 | 0.046 | 4.36E-101 | 204,105 |
| 41 | KNOWN | rs9268807 | rs9269233                         | 6 | 32,451,762 | A                | C                             | 0.230 | 1.170 | 0.024 | 3.40E-11  | 0.676 | 0.034 | 5.68E-30  | 60,058  |
| 41 | KNOWN | rs9268807 | rs9270371                         | 6 | 32,558,190 | T                | G                             | 0.306 | 0.886 | 0.026 | 4.04E-06  | 0.521 | 0.036 | 4.05E-75  | 200,168 |
| 41 | KNOWN | rs9268807 | rs2647078                         | 6 | 32,566,096 | C                | G                             | 0.806 | 0.803 | 0.023 | 8.51E-21  | 0.208 | 0.047 | 7.63E-244 | 204,105 |
| 41 | KNOWN | rs9268807 | rs1966002                         | 6 | 32,581,684 | T                | G                             | 0.454 | 1.337 | 0.025 | 8.43E-31  | 1.722 | 0.033 | 6.75E-60  | 57,253  |
| 41 | KNOWN | rs9268807 | rs116352702                       | 6 | 32,594,661 | A                | G                             | 0.954 | 0.752 | 0.066 | 1.38E-05  | 0.543 | 0.071 | 7.62E-18  | 56,121  |
| 41 | KNOWN | rs9268807 | rs9273190                         | 6 | 32,613,418 | A                | T                             | 0.364 | 1.026 | 0.025 | 2.89E-01  | 1.790 | 0.037 | 1.10E-54  | 200,168 |
| 41 | KNOWN | rs9268807 | rs140780894                       | 6 | 32,625,384 | T                | G                             | 0.224 | 1.086 | 0.029 | 4.23E-03  | 1.410 | 0.038 | 3.72E-19  | 200,168 |
| 41 | KNOWN | rs9268807 | rs9274384                         | 6 | 32,632,635 | A                | C                             | 0.727 | 1.065 | 0.023 | 6.22E-03  | 1.415 | 0.030 | 5.26E-31  | 200,168 |
| 41 | KNOWN | rs9268807 | rs189311301                       | 6 | 32,655,916 | C                | G                             | 0.991 | 2.233 | 0.127 | 2.92E-10  | 2.486 | 0.129 | 1.85E-12  | 201,300 |
| 41 | KNOWN | rs9268807 | rs34723256                        | 6 | 32,658,694 | A                | T                             | 0.059 | 1.064 | 0.038 | 9.82E-02  | 2.282 | 0.047 | 3.59E-68  | 60,058  |
| 41 | KNOWN | rs9268807 | rs113523948                       | 6 | 32,663,158 | C                | G                             | 0.063 | 0.819 | 0.055 | 3.02E-04  | 0.578 | 0.058 | 3.16E-21  | 204,105 |
| 41 | KNOWN | rs9268807 | rs36030018                        | 6 | 32,667,964 | C                | G                             | 0.109 | 0.944 | 0.029 | 4.46E-02  | 1.586 | 0.037 | 2.55E-36  | 204,105 |
| 41 | KNOWN | rs9268807 | rs17206287                        | 6 | 32,674,725 | A                | G                             | 0.858 | 1.200 | 0.026 | 2.04E-12  | 1.501 | 0.037 | 2.02E-27  | 66,937  |
| 41 | KNOWN | rs9268807 | rs3135461                         | 6 | 32,680,122 | A                | G                             | 0.841 | 0.726 | 0.024 | 1.88E-39  | 0.711 | 0.031 | 1.93E-27  | 62,672  |
| 41 | KNOWN | rs9268807 | rs9275599                         | 6 | 32,682,429 | T                | C                             | 0.032 | 0.919 | 0.051 | 9.77E-02  | 1.585 | 0.056 | 1.97E-16  | 204,105 |
| 41 | KNOWN | rs9268807 | rs11426605                        | 6 | 32,708,364 | T                | TA                            | 0.966 | 0.902 | 0.051 | 4.26E-02  | 0.648 | 0.055 | 2.52E-15  | 57,253  |
| 41 | KNOWN | rs9268807 | rs7753017                         | 6 | 32,727,325 | A                | G                             | 0.237 | 0.745 | 0.021 | 5.33E-43  | 0.804 | 0.026 | 5.99E-17  | 204,105 |
| 41 | KNOWN | rs9268807 | rs574879686                       | 6 | 32,749,489 | A                | G                             | 0.018 | 0.701 | 0.073 | 1.11E-06  | 0.635 | 0.075 | 1.16E-09  | 204,105 |
| 41 | KNOWN | rs9268807 | rs144227975                       | 6 | 32,777,915 | CTTT             | C                             | 0.665 | 0.995 | 0.017 | 7.83E-01  | 0.864 | 0.019 | 4.42E-15  | 204,105 |
| 41 | KNOWN | rs9268807 | rs115910061                       | 6 | 33,044,015 | T                | G                             | 0.059 | 0.721 | 0.047 | 4.82E-12  | 0.655 | 0.049 | 2.98E-18  | 208,370 |
| 41 | KNOWN | rs9268807 | rs1431403                         | 6 | 33,047,031 | T                | C                             | 0.390 | 0.848 | 0.017 | 1.14E-22  | 0.816 | 0.018 | 5.30E-29  | 208,370 |
| 41 | KNOWN | rs9268807 | rs3846852                         | 6 | 33,413,007 | A                | G                             | 0.016 | 1.364 | 0.067 | 3.58E-06  | 1.515 | 0.068 | 1.23E-09  | 57,253  |
| 41 | KNOWN | rs9268807 | rs554962164                       | 6 | 33,955,501 | A                | C                             | 0.982 | 1.964 | 0.134 | 5.18E-07  | 2.241 | 0.135 | 2.11E-09  | 187,562 |

|    |       |             |             |   |             |    |                     |       |       |       |           |       |       |          |         |
|----|-------|-------------|-------------|---|-------------|----|---------------------|-------|-------|-------|-----------|-------|-------|----------|---------|
| 42 | KNOWN | rs6457796   | rs111658701 | 6 | 34,228,565  | T  | C                   | 0.949 | 1.356 | 0.067 | 5.58E-06  | 1.489 | 0.068 | 3.93E-09 | 187,562 |
| 42 | KNOWN | rs6457796   | rs6457796   | 6 | 34,828,553  | T  | C                   | 0.864 | 0.808 | 0.022 | 2.68E-22  | 0.808 | 0.023 | 6.31E-21 | 208,370 |
| 42 | KNOWN | rs6457796   | rs10484578  | 6 | 35,246,319  | A  | G                   | 0.628 | 1.131 | 0.016 | 3.73E-14  | 1.108 | 0.017 | 8.26E-10 | 208,370 |
| 43 | NOVEL | rs34868004  | rs56285849  | 6 | 36,704,293  | T  | C                   | 0.956 | 1.350 | 0.056 | 9.19E-08  | 1.425 | 0.057 | 3.77E-10 | 205,565 |
| 43 | NOVEL | rs34868004  | rs34868004  | 6 | 36,715,031  | CA | C                   | 0.225 | 1.104 | 0.017 | 4.46E-09  | 1.116 | 0.017 | 1.04E-10 | 208,370 |
| 44 | KNOWN | rs597325    | rs3857496   | 6 | 90,719,164  | T  | C                   | 0.814 | 1.116 | 0.019 | 7.66E-09  | 1.116 | 0.019 | 8.73E-09 | 208,370 |
| 44 | KNOWN | rs597325    | rs597325    | 6 | 91,002,494  | A  | G                   | 0.548 | 0.906 | 0.015 | 4.60E-11  | 0.907 | 0.015 | 4.80E-11 | 208,370 |
| 45 | KNOWN | rs548234    | rs548234    | 6 | 106,568,034 | T  | C                   | 0.705 | 0.819 | 0.015 | 5.54E-39  | 0.819 | 0.015 | 6.54E-39 | 208,370 |
| 46 | NOVEL | rs9488914   | rs9488914   | 6 | 116,690,849 | T  | C                   | 0.920 | 0.862 | 0.026 | 1.14E-08  | 0.862 | 0.026 | 1.10E-08 | 208,370 |
| 47 | KNOWN | rs148314165 | rs75163761  | 6 | 138,157,489 | T  | C                   | 0.042 | 1.631 | 0.048 | 5.23E-24  | 1.484 | 0.049 | 5.38E-16 | 187,562 |
| 47 | KNOWN | rs148314165 | rs9494894   | 6 | 138,228,520 | T  | C                   | 0.941 | 0.586 | 0.027 | 3.48E-84  | 0.600 | 0.028 | 1.98E-76 | 208,370 |
| 48 | NOVEL | rs9322454   | rs9322454   | 6 | 154,570,651 | A  | G                   | 0.659 | 1.090 | 0.015 | 2.42E-08  | 1.090 | 0.015 | 2.26E-08 | 208,370 |
| 49 | KNOWN | rs4598207   | rs62447171  | 7 | 50,309,890  | A  | G                   | 0.292 | 0.767 | 0.016 | 8.97E-60  | 0.790 | 0.017 | 1.49E-43 | 208,370 |
| 49 | KNOWN | rs4598207   | rs10239000  | 7 | 50,332,196  | A  | G                   | 0.242 | 1.189 | 0.017 | 1.51E-25  | 1.107 | 0.017 | 4.46E-09 | 208,370 |
| 50 | KNOWN | rs117026326 | rs10716716  | 7 | 73,607,942  | G  | GT                  | 0.159 | 1.151 | 0.023 | 8.49E-10  | 1.198 | 0.023 | 3.32E-15 | 208,370 |
| 50 | KNOWN | rs117026326 | rs372942110 | 7 | 73,629,019  | T  | TAATA<br>TATAT<br>A | 0.008 | 2.294 | 0.142 | 5.62E-09  | 2.278 | 0.143 | 8.02E-09 | 47,452  |
| 50 | KNOWN | rs117026326 | rs78290495  | 7 | 73,697,541  | T  | C                   | 0.965 | 0.799 | 0.047 | 2.00E-06  | 0.760 | 0.047 | 6.96E-09 | 204,433 |
| 50 | KNOWN | rs117026326 | rs530634980 | 7 | 73,910,241  | T  | C                   | 0.016 | 2.016 | 0.081 | 5.10E-18  | 1.900 | 0.081 | 2.81E-15 | 199,014 |
| 50 | KNOWN | rs117026326 | rs13244581  | 7 | 73,995,034  | C  | G                   | 0.092 | 0.667 | 0.044 | 1.59E-20  | 0.690 | 0.044 | 3.45E-17 | 201,819 |
| 50 | KNOWN | rs117026326 | rs116991837 | 7 | 74,003,710  | A  | G                   | 0.016 | 2.654 | 0.124 | 3.82E-15  | 2.803 | 0.125 | 1.26E-16 | 183,488 |
| 50 | KNOWN | rs117026326 | rs150724213 | 7 | 74,020,343  | A  | G                   | 0.010 | 3.882 | 0.171 | 2.51E-15  | 2.628 | 0.172 | 2.00E-08 | 18,619  |
| 50 | KNOWN | rs117026326 | rs7800325   | 7 | 74,032,651  | T  | C                   | 0.826 | 0.449 | 0.022 | 1.04E-280 | 0.686 | 0.031 | 2.19E-33 | 204,433 |
| 50 | KNOWN | rs117026326 | rs67955681  | 7 | 74,039,668  | T  | TA                  | 0.157 | 0.849 | 0.026 | 3.68E-10  | 0.793 | 0.028 | 1.32E-16 | 208,370 |
| 50 | KNOWN | rs117026326 | rs68008267  | 7 | 74,087,465  | T  | C                   | 0.025 | 1.406 | 0.049 | 2.65E-12  | 1.360 | 0.052 | 3.81E-09 | 204,433 |
| 50 | KNOWN | rs117026326 | rs79171842  | 7 | 74,098,622  | A  | T                   | 0.990 | 0.405 | 0.091 | 3.02E-23  | 0.400 | 0.094 | 1.57E-22 | 190,367 |
| 50 | KNOWN | rs117026326 | rs143176121 | 7 | 74,108,439  | T  | C                   | 0.980 | 0.292 | 0.071 | 1.58E-66  | 0.574 | 0.074 | 6.92E-14 | 204,433 |
| 50 | KNOWN | rs117026326 | rs117026326 | 7 | 74,126,034  | T  | C                   | 0.175 | 2.137 | 0.021 | 2.20E-298 | 1.490 | 0.028 | 1.27E-45 | 201,819 |
| 50 | KNOWN | rs117026326 | rs587680541 | 7 | 74,195,634  | T  | TC                  | 0.014 | 4.140 | 0.085 | 4.24E-62  | 2.296 | 0.088 | 5.46E-21 | 197,554 |
| 50 | KNOWN | rs117026326 | rs199789198 | 7 | 74,196,185  | A  | C                   | 0.073 | 3.098 | 0.038 | 2.57E-194 | 1.493 | 0.045 | 3.87E-19 | 201,819 |
| 50 | KNOWN | rs117026326 | rs587621258 | 7 | 75,079,055  | A  | G                   | 0.008 | 1.854 | 0.119 | 2.27E-07  | 2.082 | 0.120 | 9.41E-10 | 56,121  |
| 50 | KNOWN | rs117026326 | rs794368    | 7 | 75,185,985  | A  | G                   | 0.567 | 1.185 | 0.016 | 1.54E-26  | 1.111 | 0.016 | 4.52E-11 | 208,370 |
| 50 | KNOWN | rs117026326 | rs77009341  | 7 | 75,188,681  | C  | G                   | 0.037 | 2.089 | 0.044 | 6.39E-62  | 1.962 | 0.045 | 2.98E-51 | 208,370 |
| 50 | KNOWN | rs117026326 | rs118048475 | 7 | 75,257,371  | T  | C                   | 0.975 | 1.186 | 0.086 | 4.63E-02  | 2.302 | 0.106 | 3.68E-15 | 187,562 |
| 50 | KNOWN | rs117026326 | rs4573208   | 7 | 75,278,547  | A  | G                   | 0.149 | 1.173 | 0.020 | 1.53E-15  | 1.149 | 0.020 | 3.83E-12 | 208,370 |
| 50 | KNOWN | rs117026326 | rs146063533 | 7 | 75,321,461  | T  | C                   | 0.028 | 1.612 | 0.059 | 9.44E-16  | 2.149 | 0.074 | 3.11E-25 | 187,562 |
| 51 | KNOWN | rs3757387   | rs3757387   | 7 | 128,576,086 | T  | C                   | 0.863 | 0.693 | 0.020 | 8.73E-79  | 0.758 | 0.021 | 2.13E-39 | 208,370 |
| 51 | KNOWN | rs3757387   | rs41298401  | 7 | 128,578,307 | C  | G                   | 0.785 | 1.294 | 0.018 | 5.04E-45  | 1.219 | 0.019 | 3.91E-26 | 208,370 |
| 51 | KNOWN | rs3757387   | rs78724056  | 7 | 128,654,051 | T  | G                   | 0.039 | 1.596 | 0.039 | 1.69E-32  | 1.279 | 0.042 | 3.78E-09 | 208,370 |
| 51 | KNOWN | rs3757387   | rs28364822  | 7 | 128,695,982 | A  | T                   | 0.028 | 1.672 | 0.060 | 1.19E-17  | 1.664 | 0.060 | 2.86E-17 | 187,562 |
| 52 | KNOWN | rs2736332   | rs2736332   | 8 | 11,339,965  | C  | G                   | 0.734 | 1.360 | 0.017 | 1.57E-70  | 1.359 | 0.017 | 2.14E-70 | 208,370 |
| 53 | KNOWN | rs2272736   | rs117627999 | 8 | 42,104,240  | T  | C                   | 0.083 | 0.827 | 0.034 | 1.62E-08  | 0.827 | 0.034 | 1.64E-08 | 208,370 |
| 54 | NOVEL | rs142937720 | rs11347613  | 8 | 71,309,696  | G  | GA                  | 0.368 | 0.888 | 0.017 | 2.34E-12  | 0.887 | 0.017 | 1.60E-12 | 208,370 |

|    |       |             |             |    |             |    |             |       |       |       |          |       |       |          |         |
|----|-------|-------------|-------------|----|-------------|----|-------------|-------|-------|-------|----------|-------|-------|----------|---------|
| 55 | NOVEL | rs17374162  | rs10111413  | 8  | 72,891,748  | A  | G           | 0.415 | 0.918 | 0.014 | 3.05E-09 | 0.917 | 0.014 | 1.95E-09 | 208,370 |
| 56 | NOVEL | rs16902895  | rs16902895  | 8  | 129,425,593 | A  | G           | 0.678 | 1.122 | 0.016 | 1.48E-13 | 1.122 | 0.016 | 1.31E-13 | 208,370 |
| 57 | KNOWN | rs1887428   | rs1887428   | 9  | 4,984,530   | C  | G           | 0.664 | 0.915 | 0.016 | 2.80E-08 | 0.915 | 0.016 | 3.03E-08 | 208,370 |
| 58 | NOVEL | rs7858766   | rs7858766   | 9  | 21,267,087  | T  | C           | 0.538 | 1.139 | 0.016 | 2.25E-15 | 1.139 | 0.016 | 1.96E-15 | 208,370 |
| 59 | NOVEL | rs77448389  | rs77448389  | 10 | 5,910,746   | A  | G           | 0.913 | 0.855 | 0.025 | 7.30E-10 | 0.855 | 0.025 | 7.05E-10 | 208,370 |
| 60 | KNOWN | rs7097397   | rs7072606   | 10 | 49,933,974  | T  | C           | 0.809 | 0.884 | 0.018 | 2.22E-12 | 0.856 | 0.018 | 1.63E-18 | 208,370 |
| 60 | KNOWN | rs7097397   | rs7097397   | 10 | 50,025,396  | A  | G           | 0.651 | 0.810 | 0.016 | 2.23E-40 | 0.796 | 0.016 | 2.21E-46 | 208,370 |
| 61 | KNOWN | rs7902146   | rs7902146   | 10 | 63,801,030  | T  | C           | 0.691 | 0.900 | 0.015 | 3.34E-12 | 0.899 | 0.015 | 1.72E-12 | 208,370 |
| 62 | NOVEL | rs10995261  | rs10995254  | 10 | 64,401,836  | T  | G           | 0.707 | 1.092 | 0.016 | 4.47E-08 | 1.096 | 0.016 | 1.37E-08 | 208,370 |
| 63 | NOVEL | rs10823829  | rs10823829  | 10 | 73,466,709  | T  | C           | 0.718 | 0.910 | 0.016 | 1.05E-09 | 0.911 | 0.016 | 2.02E-09 | 208,370 |
| 64 | NOVEL | rs111447985 | rs11599734  | 10 | 103,963,397 | C  | G           | 0.479 | 0.918 | 0.016 | 5.89E-08 | 0.917 | 0.016 | 3.53E-08 | 208,370 |
| 64 | NOVEL | rs111447985 | rs111447985 | 10 | 105,677,911 | A  | C           | 0.073 | 1.172 | 0.028 | 1.72E-08 | 1.176 | 0.028 | 9.86E-09 | 208,370 |
| 65 | NOVEL | rs58164562  | rs58164562  | 10 | 112,664,114 | T  | C           | 0.748 | 0.892 | 0.016 | 3.14E-12 | 0.891 | 0.016 | 2.37E-12 | 208,370 |
| 66 | NOVEL | rs3750996   | rs3750996   | 11 | 4,113,200   | A  | G           | 0.834 | 1.167 | 0.022 | 1.89E-12 | 1.167 | 0.022 | 1.86E-12 | 208,370 |
| 67 | NOVEL | rs77885959  | rs77885959  | 11 | 18,362,382  | T  | G           | 0.978 | 1.694 | 0.062 | 3.16E-17 | 1.694 | 0.063 | 3.41E-17 | 204,433 |
| 68 | KNOWN | rs2785198   | rs2732540   | 11 | 35,095,486  | A  | G           | 0.224 | 0.847 | 0.018 | 1.30E-20 | 0.874 | 0.019 | 4.17E-13 | 208,370 |
| 68 | KNOWN | rs2785198   | rs11032994  | 11 | 35,111,157  | A  | G           | 0.256 | 1.147 | 0.016 | 1.12E-17 | 1.110 | 0.017 | 3.55E-10 | 208,370 |
| 69 | KNOWN | rs10896045  | rs10896045  | 11 | 65,555,524  | A  | G           | 0.551 | 1.168 | 0.015 | 6.59E-26 | 1.171 | 0.015 | 7.96E-27 | 208,370 |
| 70 | KNOWN | rs4930642   | rs4930642   | 11 | 68,816,370  | A  | G           | 0.252 | 1.145 | 0.019 | 6.16E-13 | 1.146 | 0.019 | 4.08E-13 | 208,370 |
| 71 | KNOWN | rs77971648  | rs77971648  | 11 | 72,640,480  | T  | C           | 0.909 | 1.291 | 0.026 | 3.16E-23 | 1.293 | 0.026 | 1.39E-23 | 208,370 |
| 72 | KNOWN | rs377392985 | rs480958    | 11 | 118,577,990 | A  | G           | 0.624 | 0.871 | 0.015 | 3.42E-19 | 0.890 | 0.016 | 1.51E-13 | 208,370 |
| 72 | KNOWN | rs377392985 | rs4936441   | 11 | 118,725,660 | C  | G           | 0.137 | 0.823 | 0.024 | 5.71E-16 | 0.858 | 0.025 | 4.65E-10 | 208,370 |
| 73 | KNOWN | rs9736939   | rs11501246  | 11 | 128,314,424 | A  | G           | 0.623 | 0.791 | 0.015 | 1.58E-58 | 0.793 | 0.015 | 1.08E-57 | 208,370 |
| 73 | KNOWN | rs9736939   | rs684150    | 11 | 128,594,161 | T  | C           | 0.381 | 0.914 | 0.014 | 4.32E-10 | 0.912 | 0.015 | 1.87E-10 | 208,370 |
| 74 | NOVEL | rs2540119   | rs2540119   | 12 | 4,140,876   | T  | C           | 0.544 | 1.086 | 0.015 | 3.51E-08 | 1.088 | 0.015 | 1.90E-08 | 208,370 |
| 75 | KNOWN | rs4251697   | rs10845602  | 12 | 12,825,237  | A  | G           | 0.710 | 1.210 | 0.016 | 5.77E-31 | 1.140 | 0.017 | 7.07E-14 | 208,370 |
| 75 | KNOWN | rs4251697   | rs4251697   | 12 | 12,874,462  | A  | G           | 0.097 | 0.637 | 0.033 | 1.17E-43 | 0.693 | 0.035 | 2.05E-26 | 208,370 |
| 76 | KNOWN | rs4622329   | rs4622329   | 12 | 102,321,935 | A  | G           | 0.561 | 1.119 | 0.014 | 4.00E-15 | 1.123 | 0.014 | 7.88E-16 | 208,370 |
| 77 | NOVEL | rs6539078   | rs6539078   | 12 | 103,916,080 | T  | C           | 0.591 | 0.894 | 0.015 | 9.49E-14 | 0.893 | 0.015 | 4.68E-14 | 208,370 |
| 78 | KNOWN | rs77465633  | rs77465633  | 12 | 111,933,545 | A  | C           | 0.068 | 1.340 | 0.034 | 6.99E-18 | 1.362 | 0.034 | 1.04E-19 | 208,370 |
| 78 | KNOWN | rs77465633  | rs1131476   | 12 | 113,357,209 | A  | G           | 0.756 | 1.110 | 0.017 | 1.25E-09 | 1.120 | 0.017 | 4.84E-11 | 208,370 |
| 79 | NOVEL | rs3999421   | rs7139263   | 12 | 118,428,976 | A  | G           | 0.510 | 1.083 | 0.015 | 9.82E-08 | 1.086 | 0.015 | 3.38E-08 | 208,370 |
| 79 | NOVEL | rs3999421   | rs35743748  | 12 | 121,228,629 | CT | C           | 0.444 | 1.101 | 0.016 | 2.45E-09 | 1.101 | 0.016 | 2.55E-09 | 208,370 |
| 80 | KNOWN | rs11059928  | rs11059928  | 12 | 129,296,103 | A  | T           | 0.786 | 0.823 | 0.017 | 1.61E-30 | 0.823 | 0.017 | 2.28E-30 | 208,370 |
| 81 | NOVEL | rs200521476 | rs200521476 | 12 | 133,040,182 | G  | GCATC<br>AC | 0.812 | 0.875 | 0.023 | 5.66E-09 | -     | -     | -        | 208,370 |
| 82 | KNOWN | rs57141708  | rs57141708  | 13 | 41,575,391  | A  | G           | 0.224 | 1.183 | 0.018 | 6.84E-22 | 1.183 | 0.018 | 6.52E-22 | 208,370 |
| 83 | KNOWN | rs2819426   | rs2819426   | 14 | 105,412,259 | C  | G           | 0.331 | 0.824 | 0.017 | 2.51E-30 | 0.824 | 0.017 | 3.57E-30 | 208,370 |
| 84 | KNOWN | rs7170151   | rs7170151   | 15 | 38,846,678  | T  | C           | 0.563 | 1.107 | 0.015 | 3.20E-12 | 1.093 | 0.015 | 2.22E-09 | 208,370 |
| 84 | KNOWN | rs7170151   | rs12900640  | 15 | 38,974,548  | A  | C           | 0.464 | 1.101 | 0.014 | 2.42E-11 | 1.085 | 0.015 | 1.90E-08 | 208,370 |
| 85 | KNOWN | rs11553760  | rs11553760  | 15 | 75,091,247  | T  | C           | 0.235 | 1.111 | 0.017 | 7.32E-10 | 1.111 | 0.017 | 7.67E-10 | 208,370 |
| 86 | NOVEL | rs35985016  | rs35985016  | 15 | 101,529,012 | A  | G           | 0.930 | 0.843 | 0.030 | 1.95E-08 | 0.843 | 0.030 | 1.95E-08 | 204,433 |
| 87 | KNOWN | rs34361002  | rs34361002  | 16 | 11,190,034  | T  | TAA         | 0.624 | 1.140 | 0.015 | 1.24E-17 | 1.140 | 0.015 | 1.33E-17 | 208,370 |
| 88 | KNOWN | rs79401250  | rs79401250  | 16 | 23,871,457  | T  | G           | 0.819 | 1.172 | 0.022 | 1.48E-12 | 1.171 | 0.023 | 2.06E-12 | 208,370 |

|     |       |             |             |    |             |   |    |       |       |       |          |       |       |          |         |
|-----|-------|-------------|-------------|----|-------------|---|----|-------|-------|-------|----------|-------|-------|----------|---------|
| 89  | KNOWN | rs534645300 | rs534645300 | 16 | 30,813,454  | A | AT | 0.930 | 0.814 | 0.035 | 2.68E-09 | 0.815 | 0.035 | 3.28E-09 | 208,370 |
| 90  | NOVEL | rs11288784  | rs11288784  | 16 | 50,089,207  | G | GT | 0.365 | 0.902 | 0.016 | 2.38E-10 | 0.901 | 0.016 | 1.40E-10 | 208,370 |
| 91  | KNOWN | rs669763    | rs669763    | 16 | 57,390,478  | C | G  | 0.521 | 1.123 | 0.015 | 2.89E-15 | 1.124 | 0.015 | 1.91E-15 | 208,370 |
| 92  | KNOWN | rs28410471  | rs28410471  | 16 | 68,554,755  | A | T  | 0.181 | 1.128 | 0.022 | 3.14E-08 | 1.128 | 0.022 | 3.09E-08 | 208,370 |
| 93  | NOVEL | rs11376510  | rs11376510  | 16 | 79,745,672  | G | GT | 0.737 | 0.898 | 0.017 | 2.23E-10 | 0.899 | 0.017 | 2.84E-10 | 208,370 |
| 94  | KNOWN | rs11117432  | rs447632    | 16 | 85,967,640  | A | G  | 0.495 | 0.851 | 0.015 | 7.23E-28 | 0.870 | 0.015 | 1.61E-20 | 208,370 |
| 94  | KNOWN | rs11117432  | rs11117432  | 16 | 86,019,271  | A | G  | 0.088 | 0.728 | 0.027 | 1.27E-32 | 0.759 | 0.027 | 2.42E-24 | 208,370 |
| 95  | NOVEL | rs61759532  | rs61759532  | 17 | 7,240,391   | T | C  | 0.076 | 1.235 | 0.032 | 2.79E-11 | 1.230 | 0.032 | 6.22E-11 | 208,370 |
| 96  | KNOWN | rs35966917  | rs35966917  | 17 | 16,839,901  | A | G  | 0.423 | 0.914 | 0.015 | 4.66E-09 | 0.916 | 0.015 | 1.04E-08 | 208,370 |
| 97  | NOVEL | rs2671655   | rs2671655   | 17 | 47,468,020  | T | C  | 0.651 | 1.087 | 0.015 | 4.60E-08 | 1.087 | 0.015 | 4.60E-08 | 208,370 |
| 98  | NOVEL | rs113417153 | rs113417153 | 17 | 76,373,179  | T | C  | 0.193 | 0.893 | 0.020 | 1.90E-08 | 0.893 | 0.020 | 1.91E-08 | 208,370 |
| 99  | KNOWN | rs1788097   | rs1788097   | 18 | 67,543,688  | T | C  | 0.392 | 1.096 | 0.015 | 6.28E-10 | 1.093 | 0.015 | 1.90E-09 | 208,370 |
| 100 | NOVEL | rs118075465 | rs118075465 | 18 | 77,386,912  | A | G  | 0.147 | 1.140 | 0.020 | 1.16E-10 | 1.136 | 0.020 | 3.23E-10 | 208,370 |
| 101 | NOVEL | rs2238577   | rs10414086  | 19 | 937,136     | T | C  | 0.374 | 0.885 | 0.016 | 2.75E-14 | 0.883 | 0.016 | 1.29E-14 | 208,370 |
| 102 | NOVEL | rs5826945   | rs11085192  | 19 | 6,689,065   | T | C  | 0.927 | 0.840 | 0.027 | 1.18E-10 | 0.838 | 0.027 | 6.07E-11 | 208,370 |
| 103 | KNOWN | rs55882956  | rs55882956  | 19 | 10,469,919  | A | G  | 0.029 | 0.674 | 0.048 | 1.23E-16 | 0.668 | 0.048 | 2.55E-17 | 208,370 |
| 104 | KNOWN | rs11673604  | rs11673604  | 19 | 18,540,988  | T | C  | 0.759 | 1.144 | 0.019 | 4.21E-12 | 1.144 | 0.019 | 3.02E-12 | 208,370 |
| 105 | NOVEL | rs12461589  | rs12461589  | 19 | 33,072,768  | T | C  | 0.248 | 0.898 | 0.017 | 5.00E-10 | 0.898 | 0.017 | 5.42E-10 | 208,370 |
| 106 | NOVEL | rs33974425  | rs8108669   | 19 | 49,845,895  | T | C  | 0.299 | 0.893 | 0.016 | 4.68E-12 | 0.892 | 0.016 | 1.99E-12 | 208,370 |
| 107 | KNOWN | rs4801882   | rs3794986   | 19 | 52,047,314  | T | G  | 0.428 | 0.890 | 0.015 | 1.46E-14 | 0.894 | 0.015 | 1.74E-13 | 208,370 |
| 107 | KNOWN | rs4801882   | rs4801882   | 19 | 52,127,053  | A | G  | 0.532 | 0.882 | 0.014 | 1.86E-18 | 0.888 | 0.014 | 1.59E-16 | 208,370 |
| 108 | NOVEL | rs4819670   | rs4819670   | 22 | 18,649,356  | T | C  | 0.210 | 1.151 | 0.022 | 5.53E-11 | 1.155 | 0.022 | 2.17E-11 | 208,370 |
| 109 | KNOWN | rs4821116   | rs5754344   | 22 | 21,963,786  | A | G  | 0.622 | 0.805 | 0.015 | 1.81E-45 | 0.804 | 0.015 | 6.20E-46 | 208,370 |
| 110 | KNOWN | rs9611155   | rs9611155   | 22 | 39,739,187  | T | C  | 0.761 | 1.137 | 0.022 | 7.66E-09 | 1.137 | 0.022 | 7.33E-09 | 208,370 |
| 111 | KNOWN | rs6641111   | rs6641111   | 23 | 12,839,790  | C | G  | 0.694 | 1.191 | 0.017 | 3.27E-25 | 1.190 | 0.017 | 4.40E-25 | 208,360 |
| 111 | KNOWN | rs6641111   | rs4830478   | 23 | 12,918,288  | A | G  | 0.797 | 1.136 | 0.021 | 1.91E-09 | 1.135 | 0.021 | 3.11E-09 | 205,555 |
| 112 | KNOWN | rs5914012   | rs5914012   | 23 | 56,908,702  | T | C  | 0.353 | 1.104 | 0.017 | 6.65E-09 | 1.104 | 0.017 | 6.65E-09 | 208,360 |
| 113 | KNOWN | rs1059702   | rs1059702   | 23 | 153,284,192 | A | G  | 0.783 | 1.356 | 0.020 | 5.89E-54 | 1.352 | 0.020 | 1.07E-52 | 208,360 |
| 113 | KNOWN | rs1059702   | rs5945199   | 23 | 153,749,857 | A | G  | 0.104 | 0.778 | 0.036 | 2.90E-12 | 0.789 | 0.036 | 4.44E-11 | 202,941 |

Region: index ID for the genomic locus; Novel: index of the novelty for the genomic locus; Lead rsID: dbSNP rsID for the lead variant within the genomic locus; rsID: dbSNP ID for index variant of the association distinct signal; CHR: chromosome; Position: position in base pair in genome build 19; EA: effective allele; NEA: non-effective allele; EAF: effective allele frequency; OR: odds ratio in the association study; SE: standard error of odds ratio in the association study; P: p-value in the association study; N: study sample size.

**Supplementary Table 6 | Putative causal variants with high posterior probability (PiP  $\geq$  0.1) or with highest PiP within 95% credible sets for 57 genomic loci**

| Region | Novel | Signal SNP  | Credible Set ID | Credible Set Size | Causal SNP  | SNP PiP | Nearest Gene | Consequence    |
|--------|-------|-------------|-----------------|-------------------|-------------|---------|--------------|----------------|
| 1      | NOVEL | rs9651076   | 1               | 31                | rs9651076   | 0.1422  | CD58         | intergenic     |
| 1      | NOVEL | rs9651076   | 1               | 31                | rs10801908  | 0.1201  | CD58         | intronic       |
| 2      | NOVEL | rs112806509 | 1               | 72                | rs112806509 | 0.0667  | FCRL5        | intronic       |
| 2      | NOVEL | rs116785379 | 2               | 3                 | rs116785379 | 0.4422  | ETV3         | UTR5           |
| 2      | NOVEL | rs116785379 | 2               | 3                 | rs80237341  | 0.2680  | ETV3         | intergenic     |
| 2      | NOVEL | rs116785379 | 2               | 3                 | rs77868288  | 0.2491  | ETV3         | intergenic     |
| 2      | NOVEL | rs2317230   | 3               | 18                | rs2317230   | 0.2005  | FCRL3        | intergenic     |
| 5      | KNOWN | rs13306575  | 1               | 1                 | rs13306575  | 1.0000  | NCF2         | exonic         |
| 5      | KNOWN | rs66977652  | 2               | 16                | rs66977652  | 0.1757  | NCF2         | intronic       |
| 6      | KNOWN | rs4143303   | 1               | 106               | rs4143303   | 0.0920  | PTPRC        | intronic       |
| 7      | NOVEL | rs3806357   | 1               | 4                 | rs3806357   | 0.8728  | ELF3-AS1     | ncRNA_exonic   |
| 8      | KNOWN | rs4844538   | 1               | 8                 | rs4844538   | 0.2773  | IKBKE        | upstream       |
| 8      | KNOWN | rs4844538   | 1               | 8                 | rs6540432   | 0.2276  | IKBKE        | intergenic     |
| 9      | NOVEL | rs75362385  | 1               | 22                | rs75362385  | 0.0947  | LOC100506274 | ncRNA_intronic |
| 11     | KNOWN | rs13385731  | 1               | 2                 | rs13385731  | 0.7957  | RASGRP3      | intronic       |
| 11     | KNOWN | rs13385731  | 1               | 2                 | rs13425999  | 0.2043  | RASGRP3      | intronic       |
| 12     | KNOWN | rs11684155  | 1               | 42                | rs11126034  | 0.0513  | SPRED2       | intronic       |
| 13     | KNOWN | rs10207954  | 1               | 18                | rs10207954  | 0.1346  | TET3         | intronic       |
| 13     | KNOWN | rs10207954  | 1               | 18                | rs2421690   | 0.1124  | DGUOK-AS1    | ncRNA_intronic |
| 13     | KNOWN | rs10207954  | 1               | 18                | rs141389817 | 0.1106  | DGUOK-AS1    | ncRNA_intronic |
| 15     | KNOWN | rs218174    | 1               | 31                | rs218174    | 0.1204  | DARS         | intergenic     |
| 16     | KNOWN | rs11679244  | 1               | 3                 | rs11679244  | 0.5623  | FAP          | intronic       |
| 16     | KNOWN | rs11679244  | 1               | 3                 | rs2075302   | 0.3764  | FAP          | intronic       |
| 18     | NOVEL | rs11684176  | 1               | 106               | rs7572733   | 0.0577  | PLCL1        | intronic       |
| 19     | KNOWN | rs7565158   | 1               | 3                 | rs7565158   | 0.6258  | LINC01878    | intergenic     |
| 19     | KNOWN | rs7565158   | 1               | 3                 | rs12612794  | 0.3117  | LINC01878    | intergenic     |
| 19     | KNOWN | rs2371790   | 2               | 29                | rs2371790   | 0.1120  | IKZF2        | intronic       |
| 19     | KNOWN | rs2371790   | 2               | 29                | rs12694291  | 0.1038  | IKZF2        | intronic       |
| 20     | NOVEL | rs438613    | 1               | 13                | rs438613    | 0.0985  | LINC01980    | intergenic     |
| 21     | NOVEL | rs7637844   | 1               | 4                 | rs7637844   | 0.6651  | LINC00870    | intergenic     |
| 21     | NOVEL | rs7637844   | 1               | 4                 | rs11707718  | 0.1976  | LINC00870    | intergenic     |
| 23     | KNOWN | rs1317082   | 1               | 24                | rs1317082   | 0.0833  | MYNN         | intronic       |
| 24     | KNOWN | rs13101828  | 1               | 9                 | rs13101828  | 0.2102  | DGKQ         | intronic       |
| 24     | KNOWN | rs13101828  | 1               | 9                 | rs11724804  | 0.1255  | DGKQ         | intronic       |
| 24     | KNOWN | rs13101828  | 1               | 9                 | rs62294486  | 0.1228  | DGKQ         | intronic       |

|    |       |             |   |     |             |        |           |                |
|----|-------|-------------|---|-----|-------------|--------|-----------|----------------|
| 24 | KNOWN | rs13101828  | 1 | 9   | rs1377586   | 0.1181 | DGKQ      | exonic         |
| 25 | NOVEL | rs231694    | 1 | 35  | rs231694    | 0.2060 | FAM193A   | intronic       |
| 25 | NOVEL | rs231694    | 1 | 35  | rs529432    | 0.1464 | FAM193A   | intronic       |
| 25 | NOVEL | rs231694    | 1 | 35  | rs231708    | 0.1037 | FAM193A   | intronic       |
| 26 | NOVEL | rs113284964 | 1 | 4   | rs113284964 | 0.3720 | LINC02265 | intergenic     |
| 26 | NOVEL | rs113284964 | 1 | 4   | rs13136820  | 0.3298 | LINC02265 | intergenic     |
| 26 | NOVEL | rs113284964 | 1 | 4   | rs11736377  | 0.1991 | LINC02265 | intergenic     |
| 32 | KNOWN | rs7725218   | 1 | 6   | rs7725218   | 0.3410 | TERT      | intronic       |
| 32 | KNOWN | rs7725218   | 1 | 6   | rs7726159   | 0.2658 | TERT      | intronic       |
| 32 | KNOWN | rs7725218   | 1 | 6   | rs4449583   | 0.2132 | TERT      | intronic       |
| 33 | KNOWN | rs2544920   | 1 | 88  | rs2544920   | 0.0388 | ST8SIA4   | intergenic     |
| 35 | NOVEL | rs2549002   | 1 | 54  | rs2549002   | 0.0379 | IRF1      | intergenic     |
| 37 | KNOWN | rs10036748  | 1 | 4   | rs10036748  | 0.3873 | TNIP1     | intronic       |
| 37 | KNOWN | rs10036748  | 1 | 4   | rs7708392   | 0.2806 | TNIP1     | intronic       |
| 37 | KNOWN | rs10036748  | 1 | 4   | rs6889239   | 0.2712 | TNIP1     | intronic       |
| 38 | NOVEL | rs2421184   | 1 | 12  | rs2421184   | 0.2607 | LINC01845 | ncRNA_intronic |
| 38 | NOVEL | rs2421184   | 1 | 12  | rs4921502   | 0.1990 | LINC01845 | ncRNA_intronic |
| 38 | NOVEL | rs2421184   | 1 | 12  | rs6556425   | 0.1212 | LINC01845 | intergenic     |
| 39 | KNOWN | rs2431697   | 1 | 2   | rs2431697   | 0.6581 | MIR3142HG | intergenic     |
| 39 | KNOWN | rs2431697   | 1 | 2   | rs2431700   | 0.3419 | MIR3142HG | intergenic     |
| 40 | NOVEL | rs9503037   | 1 | 18  | rs9503037   | 0.2160 | LOC285766 | intergenic     |
| 40 | NOVEL | rs9503037   | 1 | 18  | rs9503029   | 0.1504 | LOC285766 | intergenic     |
| 44 | KNOWN | rs597325    | 1 | 3   | rs597325    | 0.8673 | BACH2     | intronic       |
| 44 | KNOWN | rs3857496   | 2 | 16  | rs12664550  | 0.1013 | BACH2     | intronic       |
| 46 | NOVEL | rs9488914   | 1 | 3   | rs9488914   | 0.4760 | DSE       | intronic       |
| 46 | NOVEL | rs9488914   | 1 | 3   | rs9387400   | 0.4271 | DSE       | intronic       |
| 55 | NOVEL | rs10111413  | 1 | 11  | rs17374162  | 0.1580 | MSC-AS1   | ncRNA_intronic |
| 55 | NOVEL | rs10111413  | 1 | 11  | rs10111413  | 0.1565 | MSC-AS1   | ncRNA_intronic |
| 55 | NOVEL | rs10111413  | 1 | 11  | rs1036963   | 0.1219 | MSC-AS1   | ncRNA_intronic |
| 55 | NOVEL | rs10111413  | 1 | 11  | rs7004602   | 0.1030 | MSC-AS1   | ncRNA_intronic |
| 55 | NOVEL | rs10111413  | 1 | 11  | rs10090715  | 0.1008 | MSC-AS1   | ncRNA_intronic |
| 56 | NOVEL | rs16902895  | 1 | 35  | rs16902895  | 0.0778 | LINC00824 | ncRNA_intronic |
| 57 | KNOWN | rs1887428   | 1 | 169 | rs1887428   | 0.4455 | JAK2      | upstream       |
| 58 | NOVEL | rs7858766   | 1 | 73  | rs7858766   | 0.0549 | IFNA22P   | intergenic     |
| 62 | NOVEL | rs10995254  | 1 | 21  | rs10995261  | 0.0958 | ZNF365    | intronic       |
| 63 | NOVEL | rs10823829  | 1 | 11  | rs10823829  | 0.1980 | CDH23     | exonic         |
| 63 | NOVEL | rs10823829  | 1 | 11  | rs7912167   | 0.1923 | CDH23     | intronic       |
| 65 | NOVEL | rs58164562  | 1 | 23  | rs58164562  | 0.1813 | BBIP1     | intronic       |
| 66 | NOVEL | rs3750996   | 1 | 1   | rs3750996   | 0.9893 | STIM1     | UTR3           |
| 67 | NOVEL | rs77885959  | 1 | 1   | rs77885959  | 0.9764 | GTF2H1    | intronic       |
| 71 | KNOWN | rs77971648  | 1 | 6   | rs77971648  | 0.4840 | FCHSD2    | intronic       |

|     |       |             |   |     |             |        |              |            |
|-----|-------|-------------|---|-----|-------------|--------|--------------|------------|
| 71  | KNOWN | rs77971648  | 1 | 6   | rs11235622  | 0.2456 | FCHSD2       | intronic   |
| 73  | KNOWN | rs11501246  | 1 | 11  | rs9736939   | 0.1745 | ETS1         | intergenic |
| 73  | KNOWN | rs11501246  | 1 | 11  | rs11501246  | 0.1399 | ETS1         | intergenic |
| 73  | KNOWN | rs11501246  | 1 | 11  | rs9736922   | 0.1399 | ETS1         | intergenic |
| 73  | KNOWN | rs11501246  | 1 | 11  | rs61909064  | 0.1049 | ETS1         | intergenic |
| 73  | KNOWN | rs11501246  | 1 | 11  | rs61909063  | 0.1009 | ETS1         | intergenic |
| 73  | KNOWN | rs684150    | 2 | 11  | rs684150    | 0.4529 | FLI1         | intronic   |
| 73  | KNOWN | rs684150    | 2 | 11  | rs587862    | 0.1306 | FLI1         | intronic   |
| 73  | KNOWN | rs684150    | 2 | 11  | rs615671    | 0.1158 | FLI1         | intronic   |
| 74  | NOVEL | rs2540119   | 1 | 11  | rs2540119   | 0.2871 | PARP11       | intergenic |
| 74  | NOVEL | rs2540119   | 1 | 11  | rs10848975  | 0.1913 | PARP11       | intergenic |
| 74  | NOVEL | rs2540119   | 1 | 11  | rs9788147   | 0.1582 | PARP11       | intergenic |
| 74  | NOVEL | rs2540119   | 1 | 11  | rs11062982  | 0.1362 | PARP11       | intergenic |
| 76  | KNOWN | rs4622329   | 1 | 1   | rs4622329   | 0.9604 | DRAM1        | intergenic |
| 78  | KNOWN | rs77465633  | 1 | 2   | rs77465633  | 0.9338 | ATXN2        | intronic   |
| 78  | KNOWN | rs1131476   | 2 | 115 | rs1131476   | 0.0239 | OAS1         | exonic     |
| 84  | KNOWN | rs7170151   | 1 | 10  | rs7170151   | 0.1836 | RASGRP1      | intronic   |
| 84  | KNOWN | rs7170151   | 1 | 10  | rs4924273   | 0.1813 | RASGRP1      | intronic   |
| 84  | KNOWN | rs7170151   | 1 | 10  | rs8035957   | 0.1260 | RASGRP1      | intronic   |
| 84  | KNOWN | rs7170151   | 1 | 10  | rs11348849  | 0.1013 | RASGRP1      | intronic   |
| 84  | KNOWN | rs12900640  | 2 | 9   | rs12900640  | 0.5383 | C15orf53     | intergenic |
| 84  | KNOWN | rs12900640  | 2 | 9   | rs145489243 | 0.1285 | C15orf53     | intergenic |
| 86  | NOVEL | rs35985016  | 1 | 2   | rs35985016  | 0.9295 | LRRK1        | exonic     |
| 88  | KNOWN | rs79401250  | 1 | 3   | rs79401250  | 0.6229 | PRKCB        | intronic   |
| 88  | KNOWN | rs79401250  | 1 | 3   | rs4592664   | 0.3026 | PRKCB        | intronic   |
| 91  | KNOWN | rs669763    | 1 | 9   | rs669763    | 0.2347 | CCL22        | intergenic |
| 91  | KNOWN | rs669763    | 1 | 9   | rs223886    | 0.1287 | CCL22        | intergenic |
| 91  | KNOWN | rs669763    | 1 | 9   | rs598366    | 0.1278 | CCL22        | intronic   |
| 91  | KNOWN | rs669763    | 1 | 9   | rs223887    | 0.1221 | CCL22        | intergenic |
| 91  | KNOWN | rs669763    | 1 | 9   | rs223889    | 0.1108 | CCL22        | upstream   |
| 93  | NOVEL | rs11376510  | 1 | 30  | rs11376510  | 0.2451 | MAFTRR       | intergenic |
| 95  | NOVEL | rs61759532  | 1 | 1   | rs61759532  | 0.9999 | ACAP1        | intronic   |
| 96  | KNOWN | rs35966917  | 1 | 22  | rs35966917  | 0.1572 | TNFRSF13B    | intergenic |
| 96  | KNOWN | rs35966917  | 1 | 22  | rs66516966  | 0.1105 | TNFRSF13B    | intergenic |
| 97  | NOVEL | rs2671655   | 1 | 1   | rs2671655   | 0.9900 | LOC102724596 | intergenic |
| 98  | NOVEL | rs113417153 | 1 | 18  | rs113417153 | 0.1655 | PGS1         | intergenic |
| 98  | NOVEL | rs113417153 | 1 | 18  | rs72899798  | 0.1313 | PGS1         | intergenic |
| 98  | NOVEL | rs113417153 | 1 | 18  | rs72911373  | 0.1260 | PGS1         | intergenic |
| 99  | KNOWN | rs1788097   | 1 | 22  | rs1788097   | 0.1007 | CD226        | intronic   |
| 100 | NOVEL | rs118075465 | 1 | 5   | rs118075465 | 0.3197 | LOC284241    | intergenic |
| 100 | NOVEL | rs118075465 | 1 | 5   | rs62096783  | 0.1825 | LOC284241    | intergenic |



|     |       |             |   |     |            |        |           |            |
|-----|-------|-------------|---|-----|------------|--------|-----------|------------|
| 100 | NOVEL | rs118075465 | 1 | 5   | rs62096781 | 0.1784 | LOC284241 | intergenic |
| 100 | NOVEL | rs118075465 | 1 | 5   | rs62096782 | 0.1460 | LOC284241 | intergenic |
| 100 | NOVEL | rs118075465 | 1 | 5   | rs2363126  | 0.1285 | LOC284241 | intergenic |
| 101 | NOVEL | rs10414086  | 1 | 15  | rs2238577  | 0.1668 | ARID3A    | intronic   |
| 101 | NOVEL | rs10414086  | 1 | 15  | rs10411830 | 0.1182 | ARID3A    | intronic   |
| 101 | NOVEL | rs10414086  | 1 | 15  | rs10414086 | 0.1115 | ARID3A    | intronic   |
| 108 | NOVEL | rs4819670   | 1 | 19  | rs4819670  | 0.0897 | USP18     | intronic   |
| 112 | KNOWN | rs5914012   | 1 | 815 | rs5914012  | 0.0050 | NBDY      | intergenic |

This table only contains the putative causal variants with SNP posterior probability larger than 0.1 and the putative causal variants with highest SNP posterior probability for each locus. Region: index ID for the genomic locus; Novel: index of the novelty for the genomic locus; Signal SNP: the rsID for all the index variants of distinct association signals. The rsIDs are separated by semicolon; Credible Set ID: index ID for the 95% credible set of causal variants; Credible Set Size: number of putative causal variants in the 95% credible set; Causal SNP: candidate putative causal variant ID; SNP PiP: posterior probability for the candidate variant to be true causal variant; Consequence: functional consequence of the candidate putative causal variant on the nearest gene.

**Supplementary Table 7 | Genetic correlation between SLE and 98 complex diseases/traits in Biobank Japan**

| Trait                                     | $r_g$   | se     | P-value  | $h^2_{SNP}$ | $h^2_{SNP}$ se | N      | FDR      |
|-------------------------------------------|---------|--------|----------|-------------|----------------|--------|----------|
| Rheumatoid arthritis                      | 0.4365  | 0.0752 | 6.38E-09 | 0.0147      | 0.0032         | 212453 | 6.25E-07 |
| Albumin/globulin ratio                    | -0.2417 | 0.0567 | 2.04E-05 | 0.0947      | 0.0108         | 98626  | 1.98E-03 |
| Non-albumin protein                       | 0.2376  | 0.0573 | 3.35E-05 | 0.098       | 0.0114         | 98538  | 3.22E-03 |
| Graves' disease                           | 0.3183  | 0.0822 | 1.00E-04 | 0.0142      | 0.0029         | 212453 | 9.50E-03 |
| Total protein                             | 0.1706  | 0.0504 | 7.00E-04 | 0.0816      | 0.0074         | 113509 | 6.58E-02 |
| Zinc sulfate turbidity test               | 0.3907  | 0.1379 | 4.60E-03 | 0.0874      | 0.0388         | 12303  | 4.28E-01 |
| Interventricular septum thickness         | -0.0038 | 0.1031 | 9.70E-01 | 0.0577      | 0.0275         | 19318  | 0.9703   |
| Drug eruption                             | 0.5256  | 0.806  | 5.14E-01 | 0.0008      | 0.0021         | 210081 | 1        |
| Epilepsy                                  | 0.2767  | 0.1799 | 1.24E-01 | 0.0024      | 0.0021         | 212453 | 1        |
| Cirrhosis                                 | 0.2063  | 0.2017 | 3.06E-01 | 0.0025      | 0.0023         | 212453 | 1        |
| Chronic obstructive pulmonary disease     | 0.1505  | 0.0794 | 5.80E-02 | 0.0119      | 0.0028         | 204907 | 1        |
| pulmonary tuberculosis                    | 0.1272  | 0.1341 | 3.43E-01 | 0.0029      | 0.0019         | 212453 | 1        |
| Chronic heart failure                     | 0.1066  | 0.0759 | 1.60E-01 | 0.0115      | 0.0025         | 212453 | 1        |
| Lactate dehydrogenase                     | 0.0879  | 0.0647 | 1.74E-01 | 0.0334      | 0.0052         | 126319 | 1        |
| Aspartate aminotransferase                | 0.0845  | 0.046  | 6.61E-02 | 0.07        | 0.0089         | 134154 | 1        |
| Asthma                                    | 0.0753  | 0.0566 | 1.84E-01 | 0.0224      | 0.0031         | 209808 | 1        |
| Osteoporosis                              | 0.0753  | 0.0856 | 3.79E-01 | 0.0084      | 0.0023         | 212453 | 1        |
| Alkaline phosphatase                      | 0.0694  | 0.043  | 1.07E-01 | 0.0964      | 0.0282         | 105030 | 1        |
| Hemoglobin                                | 0.0637  | 0.0496 | 1.99E-01 | 0.07        | 0.0068         | 108769 | 1        |
| Activated partial thromboplastin time     | 0.0626  | 0.0833 | 4.53E-01 | 0.0545      | 0.017          | 37767  | 1        |
| Cerebral aneurysm                         | 0.0612  | 0.071  | 3.89E-01 | 0.0155      | 0.0029         | 195203 | 1        |
| Red blood cell count                      | 0.0529  | 0.0446 | 2.35E-01 | 0.1225      | 0.0128         | 108794 | 1        |
| Cervical cancer                           | 0.0515  | 0.1034 | 6.19E-01 | 0.0123      | 0.0047         | 90336  | 1        |
| Hematocrit                                | 0.0486  | 0.0467 | 2.99E-01 | 0.0757      | 0.0072         | 108757 | 1        |
| Myocardial infarction                     | 0.0473  | 0.0382 | 2.16E-01 | 0.0566      | 0.0079         | 212453 | 1        |
| Relative wall thickness                   | 0.0448  | 0.0799 | 5.75E-01 | 0.0918      | 0.0272         | 19311  | 1        |
| C-reactive protein                        | 0.0443  | 0.1158 | 7.02E-01 | 0.0221      | 0.0092         | 75391  | 1        |
| Esophageal cancer                         | 0.0343  | 0.0653 | 5.99E-01 | 0.0129      | 0.0049         | 197045 | 1        |
| Mean corpuscular hemoglobin concentration | 0.0331  | 0.0511 | 5.17E-01 | 0.0563      | 0.0103         | 108728 | 1        |
| Adult Height                              | 0.0295  | 0.0235 | 2.09E-01 | 0.3563      | 0.0193         | 159148 | 1        |
| Serum creatinine                          | 0.0284  | 0.0394 | 4.72E-01 | 0.1051      | 0.0099         | 142097 | 1        |

|                                                |         |        |          |        |        |        |   |
|------------------------------------------------|---------|--------|----------|--------|--------|--------|---|
| Pancreatic cancer                              | 0.0196  | 0.16   | 9.03E-01 | 0.002  | 0.0025 | 196187 | 1 |
| Arrhythmia                                     | 0.0194  | 0.0447 | 6.64E-01 | 0.0311 | 0.0058 | 212453 | 1 |
| Pulse pressure                                 | 0.0178  | 0.049  | 7.17E-01 | 0.0534 | 0.0051 | 136249 | 1 |
| Type2 diabetes                                 | 0.0169  | 0.0322 | 5.99E-01 | 0.1061 | 0.0088 | 210865 | 1 |
| Posterior wall thickness                       | 0.0142  | 0.072  | 8.44E-01 | 0.1068 | 0.0262 | 19373  | 1 |
| Systolic blood pressure                        | 0.0116  | 0.0394 | 7.68E-01 | 0.0792 | 0.0074 | 136597 | 1 |
| Arteriosclerosis obliterans                    | 0.0105  | 0.0617 | 8.66E-01 | 0.0162 | 0.0025 | 212453 | 1 |
| Low-density-lipoprotein cholesterol            | 0.01    | 0.0697 | 8.86E-01 | 0.0623 | 0.0183 | 72866  | 1 |
| Mean arterial pressure                         | 0.0095  | 0.04   | 8.13E-01 | 0.0754 | 0.0075 | 136482 | 1 |
| Body mass index                                | 0.0094  | 0.0303 | 3.11E-01 | 0.1708 | 0.0085 | 158284 | 1 |
| Diastolic blood pressure                       | 0.0044  | 0.0431 | 9.19E-01 | 0.0628 | 0.0064 | 136615 | 1 |
| Estimated glomerular filtration rate           | -0.0062 | 0.0395 | 8.75E-01 | 0.1008 | 0.0094 | 143658 | 1 |
| Left ventricular internal dimension in systole | -0.0063 | 0.0674 | 9.26E-01 | 0.1503 | 0.0247 | 19586  | 1 |
| Creatine kinase                                | -0.0068 | 0.0427 | 8.74E-01 | 0.1016 | 0.0105 | 106080 | 1 |
| Nephrotic syndrome                             | -0.0074 | 0.1475 | 9.60E-01 | 0.0031 | 0.0023 | 212453 | 1 |
| Stable angina                                  | -0.0086 | 0.0579 | 8.81E-01 | 0.0262 | 0.0031 | 212453 | 1 |
| Chloride                                       | -0.0094 | 0.0509 | 8.53E-01 | 0.0593 | 0.0071 | 126402 | 1 |
| Alanine aminotransferase                       | -0.0103 | 0.0452 | 8.20E-01 | 0.0637 | 0.0085 | 134182 | 1 |
| Total cholesterol                              | -0.0122 | 0.0588 | 8.36E-01 | 0.0542 | 0.0117 | 128305 | 1 |
| Uterine fibroid                                | -0.0131 | 0.0815 | 8.73E-01 | 0.0231 | 0.0055 | 100964 | 1 |
| Cataract                                       | -0.0132 | 0.0923 | 8.86E-01 | 0.0071 | 0.0023 | 212453 | 1 |
| Eosinophil count                               | -0.0133 | 0.0651 | 8.38E-01 | 0.0861 | 0.0145 | 62076  | 1 |
| Mean corpuscular hemoglobin                    | -0.015  | 0.0433 | 7.29E-01 | 0.1645 | 0.0243 | 108054 | 1 |
| γ-glutamyl transferase                         | -0.0157 | 0.0503 | 7.54E-01 | 0.1172 | 0.0215 | 118309 | 1 |
| Gastric cancer                                 | -0.0176 | 0.0756 | 8.16E-01 | 0.0123 | 0.0031 | 202308 | 1 |
| Total bilirubin                                | -0.0197 | 0.0537 | 7.13E-01 | 0.06   | 0.0188 | 110207 | 1 |
| Basophil count                                 | -0.0236 | 0.0639 | 7.12E-01 | 0.0694 | 0.0171 | 62076  | 1 |
| High-density-lipoprotein cholesterol           | -0.0248 | 0.0577 | 6.68E-01 | 0.1131 | 0.0362 | 70657  | 1 |
| Blood urea nitrogen                            | -0.0261 | 0.0446 | 5.59E-01 | 0.0758 | 0.0077 | 139818 | 1 |
| Triglyceride                                   | -0.0262 | 0.0384 | 4.96E-01 | 0.1242 | 0.0332 | 105597 | 1 |
| Mean corpuscular volume                        | -0.0263 | 0.0451 | 5.59E-01 | 0.185  | 0.0259 | 108256 | 1 |
| Potassium                                      | -0.0279 | 0.0475 | 5.57E-01 | 0.0544 | 0.0079 | 132938 | 1 |
| cerebral infarction                            | -0.0287 | 0.0633 | 6.50E-01 | 0.0168 | 0.0028 | 210054 | 1 |
| Ejection fraction                              | -0.0287 | 0.0869 | 7.41E-01 | 0.0866 | 0.0242 | 19516  | 1 |
| Platelet count                                 | -0.0309 | 0.0429 | 4.72E-01 | 0.1593 | 0.0219 | 108208 | 1 |

|                                                 |         |        |          |        |        |        |   |
|-------------------------------------------------|---------|--------|----------|--------|--------|--------|---|
| Prothrombin time                                | -0.0328 | 0.0704 | 6.42E-01 | 0.0599 | 0.0236 | 58110  | 1 |
| Atopic dermatitis                               | -0.0347 | 0.0888 | 6.96E-01 | 0.0119 | 0.0026 | 212036 | 1 |
| Chronic hepatitis C                             | -0.0349 | 0.1    | 7.28E-01 | 0.0077 | 0.0023 | 212453 | 1 |
| Left ventricular mass                           | -0.0356 | 0.0695 | 6.09E-01 | 0.1515 | 0.0274 | 19076  | 1 |
| Calcium                                         | -0.0379 | 0.0675 | 5.75E-01 | 0.0531 | 0.0105 | 71701  | 1 |
| Unstable angina                                 | -0.0387 | 0.0647 | 5.49E-01 | 0.0151 | 0.0025 | 212453 | 1 |
| Glaucoma                                        | -0.0429 | 0.0684 | 5.31E-01 | 0.0139 | 0.0025 | 212453 | 1 |
| Neutrophil count                                | -0.0439 | 0.0517 | 3.97E-01 | 0.1216 | 0.0147 | 62076  | 1 |
| Left ventricular mass index                     | -0.047  | 0.0832 | 5.72E-01 | 0.1159 | 0.0274 | 17837  | 1 |
| Blood sugar                                     | -0.0534 | 0.0599 | 3.73E-01 | 0.0511 | 0.0089 | 93146  | 1 |
| Left ventricular internal dimension in diastole | -0.059  | 0.0704 | 4.02E-01 | 0.1476 | 0.0239 | 19676  | 1 |
| Colorectal cancer                               | -0.061  | 0.0792 | 4.41E-01 | 0.0144 | 0.0026 | 202807 | 1 |
| White blood cell count                          | -0.0616 | 0.0448 | 1.69E-01 | 0.1074 | 0.0104 | 107964 | 1 |
| Fractional shortening                           | -0.0641 | 0.0882 | 4.68E-01 | 0.0794 | 0.022  | 19580  | 1 |
| Sodium                                          | -0.0715 | 0.05   | 1.53E-01 | 0.0563 | 0.0067 | 127304 | 1 |
| Pollinosis                                      | -0.0719 | 0.0889 | 4.19E-01 | 0.0073 | 0.0023 | 212453 | 1 |
| Phosphorus                                      | -0.0736 | 0.0779 | 3.45E-01 | 0.0497 | 0.0126 | 42793  | 1 |
| Uric acid                                       | -0.0764 | 0.0376 | 4.22E-02 | 0.1643 | 0.0502 | 109029 | 1 |
| Lung cancer                                     | -0.0873 | 0.1079 | 4.18E-01 | 0.0048 | 0.0023 | 212453 | 1 |
| Monocyte count                                  | -0.0948 | 0.061  | 1.20E-01 | 0.092  | 0.0121 | 62076  | 1 |
| Lymphocyte count                                | -0.1041 | 0.0532 | 5.04E-02 | 0.0855 | 0.0107 | 62076  | 1 |
| Urolithiasis                                    | -0.115  | 0.0596 | 5.35E-02 | 0.0187 | 0.0032 | 212453 | 1 |
| Keloid                                          | -0.1166 | 0.0867 | 1.79E-01 | 0.0084 | 0.0022 | 212453 | 1 |
| Endometrial cancer                              | -0.1169 | 0.1303 | 3.70E-01 | 0.0085 | 0.0049 | 90730  | 1 |
| Prostate cancer                                 | -0.1208 | 0.0569 | 3.38E-02 | 0.0461 | 0.0069 | 109347 | 1 |
| Fibrinogen                                      | -0.1227 | 0.186  | 5.10E-01 | 0.0235 | 0.0248 | 18348  | 1 |
| Albumin                                         | -0.1261 | 0.055  | 2.20E-02 | 0.0623 | 0.0072 | 102223 | 1 |
| Hemoglobin A1c                                  | -0.1403 | 0.0553 | 1.12E-02 | 0.1102 | 0.0194 | 42790  | 1 |
| breast cancer                                   | -0.142  | 0.0687 | 3.89E-02 | 0.0273 | 0.0056 | 95283  | 1 |
| Chronic hepatitis B                             | -0.1649 | 0.107  | 1.23E-01 | 0.0055 | 0.0023 | 212453 | 1 |
| Hepatic cancer                                  | -0.2594 | 0.2805 | 3.55E-01 | 0.0015 | 0.0024 | 197611 | 1 |
| Ovarian cancer                                  | -0.2892 | 0.3235 | 3.71E-01 | 0.0028 | 0.0046 | 90451  | 1 |

$r_g$ : genetic correlation estimation in LD score regression; se: standard error of  $r_g$  estimation;  $h^2_{SNP}$  and  $h^2_{SNP}$  se: SNP-based heritability estimation for trait and its standard error; N: study sample size for trait; FDR: Benjamini-Hochberg false discovery rate.
